# Supplementary material for: Synergistic pathways for reducing food loss and waste along the food supply chain reconcile SDG 12.3 with distributive justice
Source: Research Square preprint supplement (doi:10.21203/rs.3.rs-8465985/v1), 2026-01-28
Supplement: Supplementary file 1 [file 1aa242ba109cdb1127ba5e5e.docx]

# Synergistic pathways for reducing food loss and waste along the food supply chain reconcile SDG 12.3 with distributive justice

Yan Xia1,2, Ziyan Yang1,2, Zhongcheng Guan1,2, Yifan Sun3, Su Zhang2, Qiang Ji1,2, Xiang Gao4,5, Cuihong Yang4,5, Huijuan Wang3,*, Jiaofeng Pan1,2,**

1Institutes of Science and Development, Chinese Academy of Sciences, Beijing, China. 2School of Public Policy and Management, University of Chinese Academy of Sciences, Beijing, China. 3School of Statistic and Mathematics, Central University of Finance and Economics, Beijing, China. 4State Key Laboratory of Mathematical Sciences, Academy of Mathematics and Systems Science, Chinese Academy of Sciences, Beijing, China. 5School of Economics and Management, University of Chinese Academy of Sciences, Beijing, China. *Corresponding author's email: huijuan-wang@163.com. ******Corresponding author's email: jfpan@cashq.ac.cn.

**Supplementary Information**

Contents

[1 System definition 4](#_Toc1102812218)

[1.1 Definition of food loss and waste 4](#_Toc33590669)

[1.2 Food categories and food supply chain 4](#_Toc1917658369)

[2 Literature review 5](#_Toc649633607)

[2.1 Food loss and waste (FLW) 5](#_Toc585171501)

[2.2 Distributive justice theory and SDG 12.3 7](#_Toc1649797694)

[2.3 Theory of distributive justice and global environmental governance 9](#_Toc1988476641)

[2.4 Theoretical framework construction 10](#_Toc1186390673)

[3 Construction of global food trade matrix 11](#_Toc282378716)

[4 Tracing Food Loss & Waste along global food supply chains 12](#_Toc219942)

[4.1 Direct FLW & Nutrition embedded in FLW: Mass balance analysis 12](#_Toc1549081547)

[5 Nutrition embedded in FLW 14](#_Toc1469307848)

[6 Tracking environmental burden within a MRIO framework 14](#_Toc742544483)

[7 Driving factors of FLW:SDA 16](#_Toc917653064)

[8 FLW Responsibility allocation：CBA & PBA 18](#_Toc1914977541)

[9 Equity assessment 19](#_Toc690113998)

[9.1 Equity of FLW responsibility allocation 19](#_Toc186786939)

[10 Target allocation schemes based on distributive justice 20](#_Toc1854475506)

[10.1 Target allocation schemes 20](#_Toc1739660431)

[10.1.1 Contribution Principle 20](#_Toc483009912)

[10.1.2 Contribution Principle 21](#_Toc459405324)

[10.1.3 Historical Responsibility Principle 21](#_Toc1021569503)

[10.1.4 Shared Responsibility Principle 22](#_Toc386879156)

[10.2 Scheme Comparison 22](#_Toc1844975423)

[10.2.1 Multi-Dimensional Consistency Indicator 23](#_Toc985555328)

[10.2.2 Principle Balance Indicator 23](#_Toc687028385)

[11 Scenario simulation analysis 24](#_Toc2013980423)

[11.1 Scenario analysis model 24](#_Toc331725347)

[11.2 Scenario Settings 24](#_Toc440359417)

[12 Data 30](#_Toc892073957)

[12.1 Food Loss and Waste Data 30](#_Toc1503655592)

[12.2 Grouping of different economies 33](#_Toc351976848)

[12.3 Social cost of carbon emissions embedded in FLW 34](#_Toc1504920498)

[12.4 SDG12.3 Allocation Schem 36](#_Toc136415520)

[13 Additional Tables and Figures 37](#_Toc1370593291)

[13.1 Supplementary Tables 37](#_Toc1651844115)

[References 39](#_Toc2022936036)

# System definition

Based on a mass balance approach combined with input output analysis, we quantify FLW across five stages of the food supply chain (FSC) for 95 food commodities in 49 countries or regions, using the latest EXIOBASE global multi regional input output (MRIO) database (version 3.8.2). We further assess the associated losses of nutrients as well as the inequalities in resource-environment-economic impacts induced by FLW. Food loss (FL) occurs during the agricultural production, post-harvest handling and storage, and manufacturing stages, whereas food waste (FW) arises at the distribution and retail and consumption stages.

## Definition of food loss and waste

The FAO Codex Alimentarius provides a clear definition of food: “Food means any substance, whether processed, semi-processed or raw, which is intended for human consumption, and includes drink, chewing gum, and any substance that has been used in the manufacture, preparation or treatment of ‘food’, but does not include cosmetics, tobacco, or substances used only as drugs.”

Although there is no universally accepted definition of food loss (FL) and food waste (FW), the Food and Agriculture Organization of the United Nations distinguishes between the two. FL refers to a reduction in the quantity of edible food intended for human consumption that occurs during the production, post-harvest handling and storage, and manufacturing stages, excluding non-food uses such as feed and seed. FW, in contrast, refers to food discarded at the distribution, retail, and consumption stages and is largely associated with the behaviour of retailers and consumers; it may also include losses occurring at distribution points1-2. In most cases, FLW involves the removal of edible food from the FSC prior to human consumption, including food that is rejected or discarded3-4. In addition, FLW may also encompass unavoidable inedible by-products generated during food production5-6. In our study, however, FLW associated with non-edible fractions is not considered. We focus exclusively on FLW arising from food production intended for human consumption and exclude non-food uses at the production stage, including feed, seed, and industrial uses.

## Food categories and food supply chain

Based on the FAO food scope and considering maximum data availability, we investigate FLW for 95 food commodities. For subsequent analyses, these commodities are further aggregated into 12 food groups (see Data S2). The 12 food groups are: (1) Cereals（for example, Paddy Rice，Wheat and Grains）; (2) Fruit &Vegetables（for example, Cassava and products, Potatoes and products and Sweet potatoes）; (3) Oilseeds（for example, Sunflower seed, Rape and Mustardseed and Sesameseed）; (4) Sugar cane/beet（for example, Sugar cane, Sugar beet and Sugar non-centrifugal）; (5) Other crops（for example, Coffee and products, Cocoa Beans and products and Tea (including mate)）; (6) Meat & meat products（for example, Bovine Meat, Pigmeat and Poultry Meat）; (7) Other animal products（for example, Honey and Fats and Animals,Raw）; (8) Fish（for example, Freshwater Fish, Demersal Fish and Pelagic Fish）; (9) Vegetable oils（for example, Soyabean Oil, Groundnut Oil and Sunflowerseed Oi）; (10) Dairy（for example, Butter and Ghee Cream)；(11) Food products（for example, Infant food）; (12) Beverages（for example, Wine and Beer Beverages, Fermented).

The food supply chain (FSC) refers to the sequential stages and operations from primary food production to final consumption, encompassing a series of processes such as crop cultivation and livestock rearing, food processing, packaging, storage, transportation and retail. The FSC is characterized by its complexity, dynamic nature and interconnected structure. We examine FLW flows across the complete five stages of the global FSC: agricultural production, post-harvest handling and storage, manufacturing, distribution and retail, and consumption.

Agricultural production represents the starting point of the FSC and involves the production of crops and livestock. The post-harvest handling and storage stage covers transportation from fields to storage facilities, storage and preliminary processing. Food undergoes further processing during the manufacturing stage. The distribution and retail stage refers to the movement of food from processing facilities or warehouses to retailers. The consumption stage includes food waste generated in households and food service establishments.

# Literature review

## Food loss and waste (FLW)

The UNEP Food Waste Index Report 2024 provides the latest global assessment and estimates that approximately 1.05 billion tonnes of food were wasted worldwide in 2022. Of this total, 60% occurred at the household level, 28% in food service and 12% in retail, corresponding to an average of about 79 kg of food waste per capita per year. This amount is equivalent to more than one billion edible meals being discarded every day. Previous studies indicate that around 30% of global food production is lost or wasted along the production and consumption chain. Approximately 14% occurs at the production stage, 15% arises from processing and distribution and 1% occurs during storage and transportation. An additional approximately 14% is attributed to waste at the consumption stage. In high-income countries, this share can reach as high as 35%37-38. In high-income economies such as the United States and the United Kingdom, agricultural mechanization and well developed cold chain systems have substantially reduced upstream losses. However, overproduction, stringent food standards, aggressive marketing strategies and consumers’ discretionary behaviour in food purchasing, storage and dietary choices contribute to more prevalent waste at the consumption stage39-40. By contrast, in low and middle income countries, the overall proportion of food waste is relatively lower. Nevertheless, limited mechanization, inadequate cold chain infrastructure and logistics, together with underdeveloped market systems, lead to more severe food losses during production, storage and transportation.

The existing research on FLW is not just a simple moral requirement of "not wasting food", it has profound and urgent multiple strategic significance. FLW reflects systemic failures within food systems. The production of food that is ultimately not consumed results in the inefficient use of finite resources and imposes substantial resource-environment-economic burdens on food systems that are already under pressure41-44.

FLW occurring across all stages of the FSC, including production, harvesting, manufacturing, retail and consumption, is closely connected to many of the major global crises currently faced by humanity. These crises include the waste of water and land resources45, climate change46, rapid biodiversity loss47, overburdened waste management systems48, environmental pollution49, energy waste50, poverty and the loss of livelihoods51. From the perspective of ecological footprints, the global blue water footprint associated with FLW is estimated at 250 billion cubic metres, accounting for 24% of the total water used in global crop production. Its land footprint reaches 1.4 billion hectares, representing 28% of the total global agricultural land area52. Agri food systems contribute approximately one third of global anthropogenic greenhouse gas emissions53-55. Greenhouse gas emissions associated with FLW from production to final disposal account for nearly half of the total life cycle emissions of the food system56. If FLW were considered as an independent country or region, its greenhouse gas emissions would rank as the third largest globally, following the United States and China57. The substantial economic losses caused by FLW for producers, consumers, governments and society as a whole are also significant. Globally, annual economic losses attributable to FLW are estimated to reach 1.2 trillion United States dollars58. For smallholder farmers, particularly in developing countries, large scale FLW can pose severe threats to livelihoods and income security. Therefore, reducing FLW is a core objective and a key performance indicator for building an efficient, resilient, inclusive and sustainable global agri food system. The challenge is directly linked to whether humanity can feed nearly ten billion people by 2050 without further degrading the Earth’s ecological systems.

Early research on FLW primarily focused on nutrient losses related to hunger and undernutrition driven by deficiencies in macronutrients such as energy and protein59. In contrast, much less attention has been paid to hidden hunger caused by FLW, which arises from deficiencies in micronutrients such as vitamins and minerals. Hidden hunger affects more than two billion people worldwide60 and is more than twice as prevalent as overt hunger, particularly in low income countries and among vulnerable populations60-61. Although less visible, the consequences of hidden hunger are more severe and long lasting. Compared with energy deficits, micronutrient deficiencies are harder to reverse through short term interventions and have lasting effects on child development, maternal health and labour productivity63-64. For example, vitamin A deficiency weakens immune function and affects about 30% of children aged six to fifty nine months globally65. Hidden hunger is therefore not only a public health issue but also a constraint on health care spending efficiency, human capital formation and national development, which further deepens inequalities across countries. While several studies have estimated per capita micronutrient availability66-68, data linking FLW to micronutrient losses remain scarce.

Existing studies have used a range of approaches to quantify FLW, including bottom up methods such as life cycle assessment17 and top down approaches such as mass balance analysis13 and input output analysis14. While life cycle assessment benefits from detailed product specific data, its limitations include subjective choices of system boundaries, which can lead to truncation of the full product system and associated truncation errors. Multi regional input output models offer a key advantage through their comprehensive coverage of the global economy, thereby addressing several limitations of life cycle assessment. MRIO models can track FLW generated within a country and distinguish domestic environmental pressures driven by local consumption from those embodied abroad. They explicitly account for trade flows, country specific production technologies and environmental intensities across different goods and services. As a result, an increasing number of studies have used MRIO tables to quantify FLW16 and to assess the environmental footprints of food systems at national13, regional12 and global14-15 scales. With accelerating globalization and expanding international food trade, the global food supply chain has become a central focus for research on FLW in agri food systems and its associated environmental impacts. A summary of existing studies that quantify FLW and its environmental impacts is provided in Table S1.

Table S1 Literature review on the quantification of FLW and its environmental impacts

| Author | Research object | Method | Data | FLW | | Environmental analysis included | | | | |
| --- | --- | --- | --- | --- | --- | --- | --- | --- | --- | --- |
| Food products | Sectors producing FLW | GHG | Water | Energy | Land | Nutrition |
| Gatto et al. (2024)14 | Global | IO | GTAP-FBS | All (11) | All (5) | √ | √ | √ | √ | √ |
| Li et al.  (2021)13 | China | Mass balance | Field research and literature | All (7) | All (6) | √ | √ | √ | √ |  |
| Osei-Owusu et al. (2020)12 | European Union | IO | Exiobase | All (11) | All (4) | √ | √ | √ | √ |  |
| Read et al.  (2020)16 | The United States | IO | BEA* | All (10) | All (4) | √ | √ | √ | √ | √ |
| Zhu et al. （2023）17 | Global | LCA | FAO | All (4) | All (8) | √ |  |  |  |  |

* The Bureau of Economic Analysis of the United States

## Distributive justice theory and SDG 12.3

The allocation of responsibility has long been a central concern in both academic and policy debates. Most existing studies are grounded in the polluter pays principle, which assigns responsibility for mitigation and environmental costs to the location where losses occur. However, the global food trade system has intensified asymmetries in responsibility allocation. Many net food exporting countries in the developing world experience substantial food losses during production, storage and transportation, yet do not receive corresponding benefits because these products are largely exported to meet consumption demand in high-income countries14. In other words, the location where losses occur often does not coincide with the location where consumption benefits are realized. Assigning responsibility solely on the basis of where losses occur may therefore exacerbate inequalities in global food governance.

Against this backdrop, Sustainable Development Goal 12.3 explicitly calls for halving food waste at the retail and consumption stages by 2030 while also reducing losses along supply chains. This target provides an important direction for global action, but its formulation places a strong emphasis on aggregate reduction and does not distinguish between the obligations or roles of different actors. On the one hand, levels of consumption stage waste are substantially higher in high-income countries than in low income countries14,16, indicating that responsibilities are not evenly distributed at the global level. On the other hand, developing countries face higher marginal costs and more limited capacity to reduce losses due to constraints in technology, infrastructure and institutional capacity. Without differentiated responsibility arrangements, such a uniform target risks obscuring asymmetries across countries in historical consumption patterns, current capabilities and development priorities, and may ultimately reinforce inequalities in implementation. Therefore, insights from climate governance, particularly the principle of common but differentiated responsibilities and respective capabilities, could inform the design of more equitable FLW reduction targets by explicitly accounting for national development levels, consumption patterns and capacity to act, thereby enhancing both policy legitimacy and fairness.

However, the existing monitoring framework for SDG 12.3, which consists of the Food Loss Index under indicator 12.3.1a and the Food Waste Index under indicator 12.3.1b, exhibits clear shortcomings with respect to equity. These indicators are primarily designed to harmonize measurement approaches, improve data comparability and track temporal trends, but they provide limited guidance on how responsibility for reduction should be allocated across countries or actors. For example, the UNEP Food Waste Index Report offers methodological guidance for quantifying food waste at the household, food service and retail levels, yet it does not address normative questions regarding which actors should bear greater responsibility for reduction70. Similarly, the FAO Food Loss Index focuses on technical definitions and data quality rather than comparative responsibility across countries. As a result, SDG 12.3 functions in practice more as a technical measurement tool than as a governance mechanism that balances efficiency with equity. In summary, the current monitoring framework places greater emphasis on aggregate reduction while giving insufficient attention to equity considerations. Within the broader SDG framework, however, equity is repeatedly emphasized as a core value. SDG 17 explicitly recognizes that countries differ in their starting points and capacities when advancing sustainable development, reflecting the principle of common but differentiated responsibilities and respective capabilities71. This provides a clear normative basis for incorporating equity into the implementation of SDG 12.3.

The equitable allocation of responsibility is central to the effective implementation of the Sustainable Development Goals. Existing literature commonly draws on three core principles from distributive justice theory to frame responsibility allocation. The first is the polluter pays principle, which holds that those who generate pollution should bear the associated mitigation costs and environmental externalities. This principle was institutionalized in policy recommendations by the OECD in the 1970s and has since become a cornerstone of international environmental governance. The second is the capability principle, which is explicitly reflected in SDG 10 and SDG 17 and emphasizes that differences in economic and technological capacity should be considered when sharing responsibility for collective goals. The third is the principle of historical responsibility, which links current obligations to accumulated past environmental impacts and is frequently invoked alongside equity in the Rio Declaration and subsequent climate agreements.

Experience from carbon emissions governance shows that countries with high emissions, high consumption levels and stronger mitigation capacity are typically assigned greater reduction obligations, whereas developing countries receive greater flexibility and support due to lower historical emissions and more pressing development needs. This logic is directly applicable to the allocation of responsibility for FLW. Assigning responsibility solely on the basis of where losses occur tends to place a disproportionate burden on developing producer countries, while overlooking their role in supplying international consumption markets. Incorporating the principles of equity, capability and historical responsibility into the responsibility framework of SDG 12.3 would therefore help address the lack of explicit differentiation in the current target formulation and ensure consistency with the broader SDG commitment to equity and the principle of leaving no one behind.

## Theory of distributive justice and global environmental governance

Food loss and waste not only undermines food security but also generates substantial transboundary environmental externalities. Governance of FLW has therefore moved beyond the scope of individual countries and exhibits the characteristics of a global public good. Reducing FLW yields domestic benefits while simultaneously contributing to global food security and climate objectives. In this context, the equitable allocation of responsibility across countries emerges as a key issue for the implementation of SDG 12.3.

Within global environmental governance, climate regimes provide the most developed framework for addressing equity. Owing to wide differences across countries in historical emissions, economic capacity and stages of development, responsibility allocation cannot follow a uniform approach. The principle of common but differentiated responsibilities and respective capabilities has therefore become a central norm. It was first established in Article 3 of the United Nations Framework Convention on Climate Change and was reaffirmed in both the preamble and operative provisions of the Paris Agreement in 2015. The literature widely recognizes that this principle integrates the polluter pays principle, the capability principle and the principle of historical responsibility. By combining these elements, it preserves the universality of global climate goals while granting greater flexibility and support to developing countries, thereby enhancing the legitimacy of climate governance. The framework offers important institutional insights for the governance of FLW. Countries with high levels of consumption and waste should assume greater reduction obligations, whereas developing countries should receive financial, technological and capacity building support to address high loss rates associated with inadequate infrastructure.

These experiences provide important insights for international governance of food loss and waste (FLW). Firstly, FLW also possesses the characteristics of a global public good. It not only affects global food security, but also brings cross-border externalities of climate, land, and water resources. If the responsibility is solely based on the "place of loss", it often places excessive burden on developing and producing countries in the global trade chain, while ignoring the actual contribution of the consumer end (especially high-income countries) to waste. Secondly, drawing on the CBDR-RC in climate governance and the Special and Differential Treatment (S&DT) in agricultural agreements, a differentiated framework can be constructed for FLW's responsibility allocation: developed countries with high consumption, high waste, and lower reduction costs should bear higher reduction obligations, while developing countries need to obtain funding, technology, and cold chain infrastructure support in international mechanisms.

## Theoretical framework construction

Based on the above analysis, our study proposes a equity assessment framework based on CBA, which aims to integrate CBA with principles of distributive equity to comprehensively assess the equity of responsibility for FLW. The framework is constructed around four core dimensions: Spatial Equity, Time Equity, Subject Equity, and Ability Equity.

First, the Spatial Equity dimension focuses on the allocation of FLW responsibility among countries and regions. It evaluates differences in responsibility for FLW across regions, ensuring that responsibility allocation at the global scale reflects equitable spatial distribution. Second, the Time Equity dimension is based on historical consumption patterns and accumulates FLW responsibility over time for different countries and regions. By accounting for the impacts of past consumption behaviors on current responsibility allocation, this dimension ensures that historical responsibility is appropriately reflected. Third, the Subject Equity dimension examines the allocation of responsibility among different income groups and lifestyles. By recognizing heterogeneity in consumption patterns and FLW generation across social groups, this dimension ensures a more equitable distribution of responsibility at the societal level. Finally, the Ability Equity dimension considers differences in countries’ development levels and their capacity to bear FLW-related environmental costs. By accounting for disparities in economic development, technological capacity, and environmental carrying capacity, this dimension adjusts responsibility allocation according to countries’ actual abilities to bear FLW and environmental burdens.

By integrating these four dimensions into a unified evaluation framework, this model not only provides a robust theoretical basis for assessing the equity of global FLW responsibility, but also offers practical and operational guidance for the formulation of equitable and effective policy interventions.


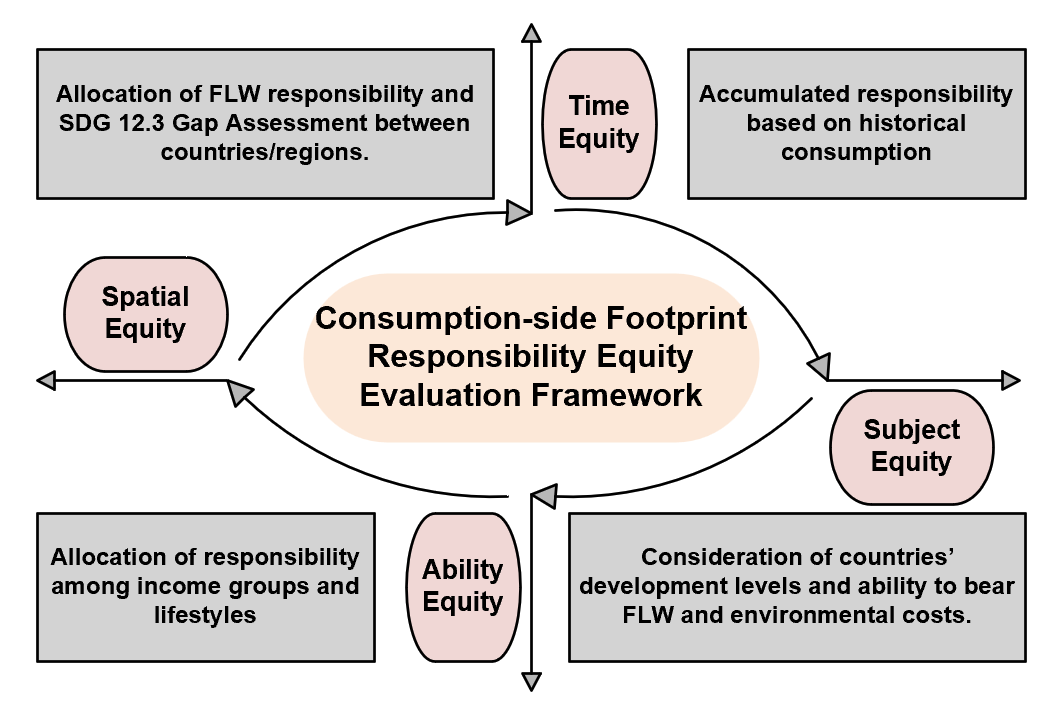


Figure S1 Theoretical framework.

# Construction of global food trade matrix

Following previous studies12, we identify food-related intermediate consumption stages within the EXIOBASE database, in which food products serve as inputs to agri-food and non-agri-food sectors, as well as the final consumption stage, where households purchase food for direct consumption. In the intermediate consumption stage, 26 agri-food sectors are identified, including 15 agriculture-related sectors and 11 food processing sectors (Table S3). In addition, 16 supplementary EXIOBASE sectors, such as hotels and public institutions, are included.

Following Chepeliev (2022)21 and Gatto (2024)14, food and non food uses reported in the FAO Food Balance Sheets (FBS) are mapped to corresponding sectors in EXIOBASE. Specifically, self-consumption in agriculture is mapped to seed, self-consumption in livestock production is mapped to feed, all processed food products are linked to food processing sectors, and food consumption activities are associated with the food service sector. Although some primary agricultural products are used by industrial sectors, these uses correspond to non food purposes and therefore do not provide food to final consumers. The EXIOBASE industry sectors are mapped to different stages of the food supply chain as shown in Table S3. Food uses, and non-food uses, including seed, feed, and Other uses, are detailed in Data S3. Based on this classification, national food-use structures are disaggregated. Specifically, total quantities of different food uses reported in the FAO Food Balance Sheets are combined with the inputoutput structure of EXIOBASE, and food uses are further allocated across countries and sectors according to each country’ s import structure.

Furthermore, we adjust the import structure within the agri-food matrix to achieve trade balance. To enhance the consistency and accuracy of trade data, we incorporate bilateral trade data from FAOSTAT. In constructing bilateral trade flows, we prioritize “imports” over “exports” as the primary basis. This choice stems from the greater accuracy typically found in importing countries' trade reports, as they rely on this data for tariff collection and statistical accounting. After obtaining detailed bilateral trade flows, we revise the agri-food import structure constructed in EXIOBASE based on each importing country's share of origin. This ensures the multi-regional input output model ultimately established exhibits higher trade flow matching and structural consistency at the global level. The FBS classification for food products is broader. For instance, rice and products in the FAO Food Balance Sheets encompasses items such as rice, husked rice, bran of rice, and flour of rice from FAO bilateral trade data, all ultimately reported as primary equivalents. Ultimately, we collect bilateral trade data for 406 agricultural products across 183 countries from 2010 to 2022. Based on FAO Item codes, we map these bilateral trade data to the 95 food categories and 49 countries in the Agri-Food Matrix (Data S3).

Table S3. Activities in the EXIOBASE mapped to the food supply chain stages.

| Food supply chain stage | Resolved EXIOBASE activity |
| --- | --- |
| Primary agriculture production | Cultivation of paddy rice  Cultivation of wheat  Cultivation of cereal grains n.e.c  Cultivation of vegetables, fruit, nuts  Cultivation of oil seeds  Cultivation of sugar cane, sugar beet  Cultivation of plant-based fibres  Cultivation of crops n.e.c  Cattle farming  Pigs farming  Poultry farming  Meat animals n.e.c  Animal products n.e.c  Raw milk  Fishing, operating of fish hatcheries and fishfarms; service activities incidental to fishing |
| Manufacturing | Manufacturing of meat cattle  Manufacturing of meat pigs  Manufacturing of meat poultry  Production of meat products n.e.c  Manufacturing vegetable oils and fats  Manufacturing of dairy products  Processed rice  Sugar refining  Manufacturing of Food products n.e.c  Manufacture of beverages  Manufacture of fish products |
| Food service | Hotels and restaurants  Transport via railways  Other land transport  Transport via pipelines  Sea and coastal water transport  Inland water transport  Air transport  Supporting and auxiliary transport activities; activities of travel agencies  Other service activities  Private households with employed persons |
| Institutional | Other business activities  Public administration and defence; compulsory social security  Education  Health and social work  Recreational, cultural and sporting activities  Extra-territorial organizations and bodies |

# Tracing Food Loss & Waste along global food supply chains

## Direct FLW & Nutrition embedded in FLW: Mass balance analysis

To trace the flows of FLW along the FSC, we construct a global food balance database, which is linked to the five stages of FSC, namely agricultural production, post-harvest handling and storage, manufacturing, distribution and retail and consumption. We further apply a mass balance approach to quantify FLW across the whole FSC (Fig. S2).

The starting point of the model is Agricultural Production. Firstly, the domestic supply (including food and non food) is:

Here, denotes the total food supply. Following the FAO definition of food, our study excludes non food uses when accounting for FLW. Accordingly, the net food supply at the agricultural production stage in country r is defined as:

In the agricultural production stage, the food supply reported in the FBS is the total amount of food loss taken into account during the production stage. Therefore, the food loss of Agricultural Production is:

Here,  denotes the amount of loss of food item*i* in country *r* at stage 1 (agricultural production), and   represents the food loss rate at this stage. The FL quantities at the remaining four stages are as follows:

Here, *t=2,3,4,5* denote the stages of post-harvest handling and storage, manufacturing, distribution and retail, and consumption, respectively.  represents the net inflow at stage *t*：

Here,   denotes the cumulative FLW from stage 1 to stage *t-1*. Finally, we map the direct FLW to the corresponding FSC stages in the EXIOBASE input output framework. Detailed information on the mapping procedure is provided in Data S5.


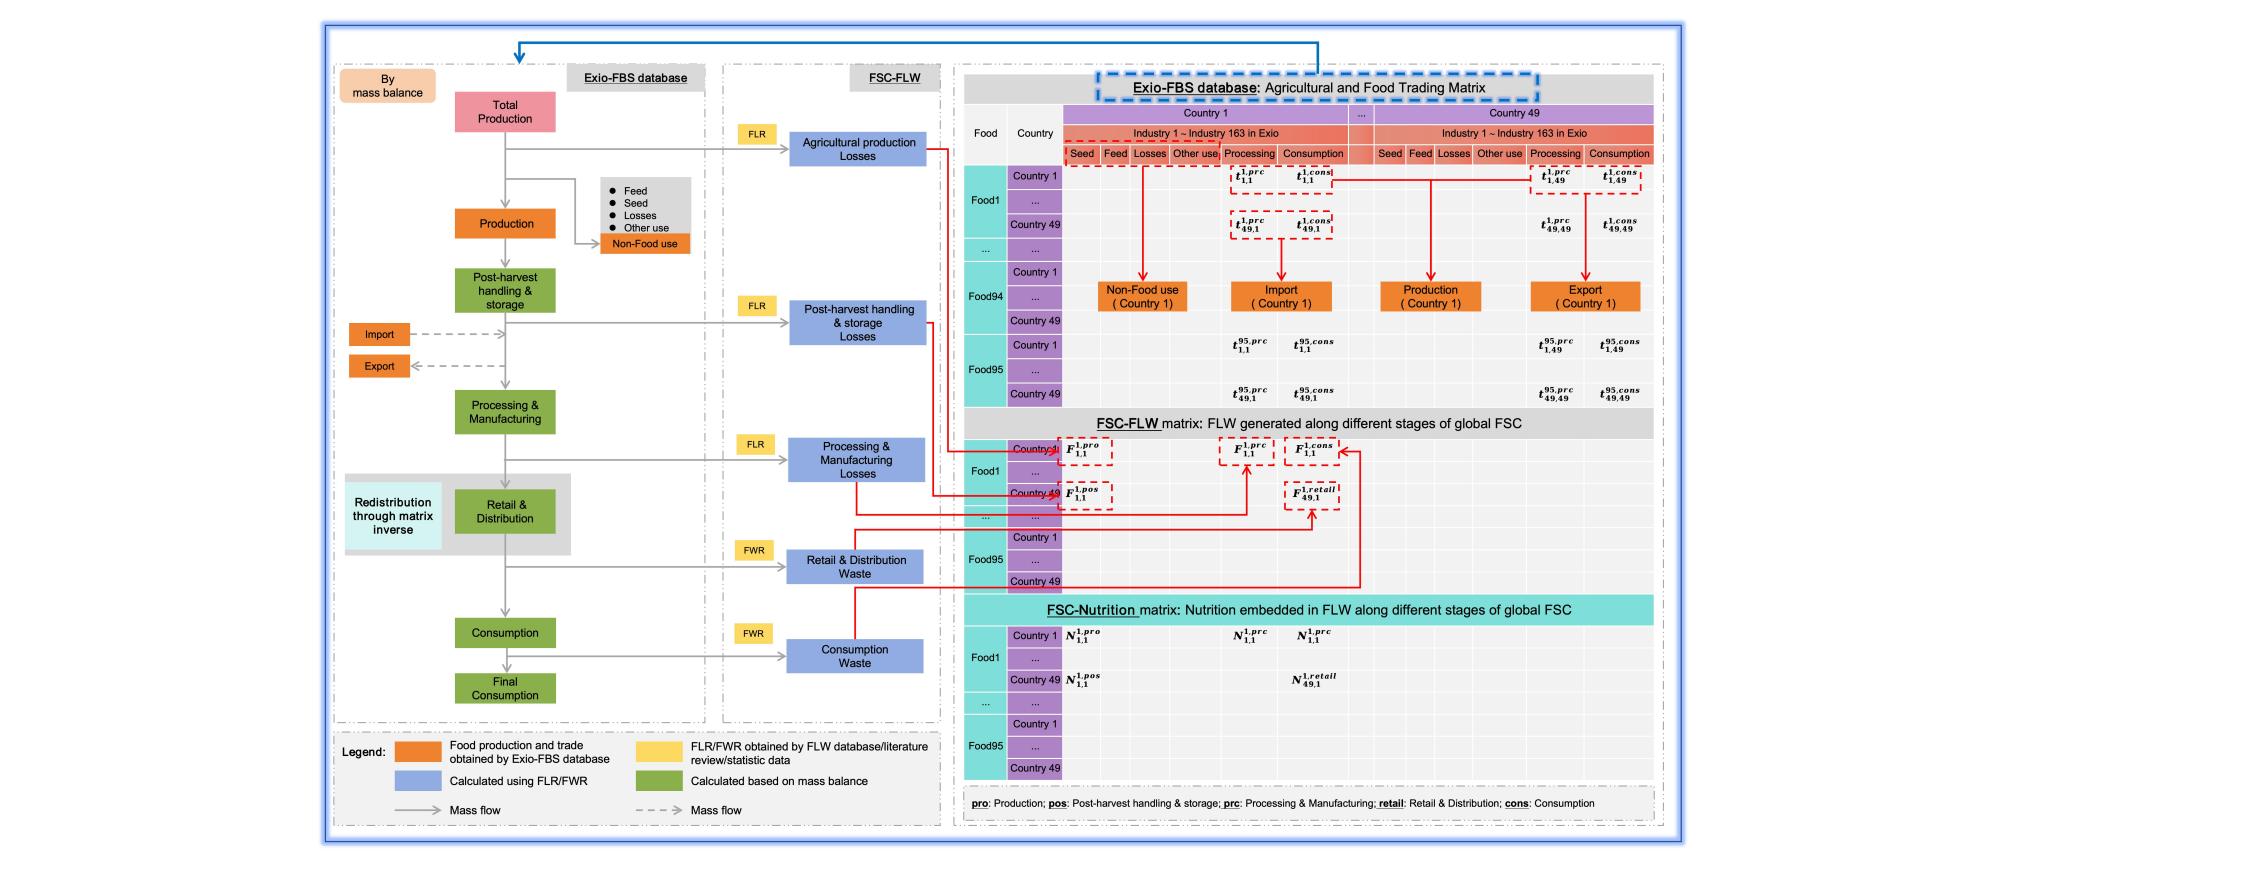


Figure S2 Measurement of direct FLW matrix generated along different stages of global FSC and nutrition matrix embedded in FLW. Calculation methods and data sources for tracking FLW in the food Supply Chain. FLR denotes food loss rates in Agricultural Production, Post-harvest handling and storage, and Manufacturing; FWR represents food waste rates in the Distribution and Retail and Consumption stages.

# Nutrition embedded in FLW

Next, based on the estimated FLW data for 95 food items across 49 countries or regions, we compile macronutrient factors, including calories, protein, fat, and carbohydrates, as well as micronutrient factors, including calcium, iron, magnesium, zinc, vitamin C, vitamin B6, vitamin B12, and vitamin A, per 100 grams of both primary and processed products for these 95 food categories from multiple data sources. These nutrient factors are used to assess nutrient losses embedded in FLW. For food item *i* (i=1,2,…,95) in country *r* (*r=1,2,…,49*), the flows of nutrients lost due to FLW are defined as follows:

denotes the content of nutrient *j* per 100 grams, where j=1,2,3,…,12 correspond to calories, protein, fat, carbohydrates, calcium, iron, magnesium, zinc, vitamin C, vitamin B6, vitamin B12, and vitamin A, respectively.

# Tracking environmental burden within a MRIO framework

Input output analysis is a top down approach that uses intersectoral transaction data to describe complex interdependencies among industries. By incorporating environmental information associated with each sector, such as greenhouse gas emissions or land use, input output tables can be environmentally extended. Environmentally extended multi regional input output (EEMRIO) analysis traces traded goods and services, together with the associated material requirements, along global FSC back to primary extraction, thereby capturing both direct and indirect environmental pressures associated with final consumption in a given country. Using standard economic accounting, the input output system can be expressed as:

Here,  denotes total output,  is the matrix of direct input coefficients,  is the Leontief inverse matrix, and  is the vector of final demand. We then incorporate environmental information into the model as follows:

Here, represents the environmental burdens embodied in FLW associated with the flows of goods and services among sectors.  is a diagonal matrix of environmental loss intensities induced by FLW per unit of food consumption, where each diagonal element represents environmental burden type *m* embedded in food loss per unit of sectoral output. The environmental burdens considered include green water consumption in agriculture, blue water consumption in agriculture, land use for crops, forests, and pasture, and greenhouse gas emissions measured as GWP100.

Here, denotes total output across all sectors, and denotes food consumption. is derived accordingly. represents the original sectoral environmental satellite account for environmental burden type , such as GHG emissions, water use, or land occupation, capturing environmental pressures generated by all production activities. To further identify environmental burdens attributable specifically to food system related production activities, we follow previous studies12,79 and apply an input structure based production side weighting approach. By calculating the share of inputs associated with the food system in each sector, denoted by , the environmental satellite accounts are proportionally scaled to obtain .

Specifically, we first calculate the share of food system related inputs for each sector based on the intermediate input matrix：

where denotes the intermediate input supplied from sector *i* to sector *j*. If sector *j* itself belongs to the food system, such as agriculture, food manufacturing, or food services, *1*. Otherwise, the coefficient is determined by the proportion of intermediate inputs that sector *j* purchases from food related sectors. Accordingly,  reflects the share of sector *j* output that is supported by the food system.

The environmental satellite accounts are subsequently scaled using this proportion to obtain the matrix of environmental burdens attributable to the food system:

*=*

Accordingly,  represents the component associated with food system production activities. The we effectively retain only the environmental pressures linked to food system related output across sectors, thereby extracting the production side environmental satellite account of the food system.

# Driving factors of FLW:SDA

By applying structural decomposition analysis (SDA) to total FLW, changes in nutrient losses associated with FLW can be attributed to production side and consumption side driving factors. It allows the identification of beneficiaries of FLW transfer and provides insight into the mechanisms underlying FLW redistribution in global agricultural trade. Let FLW in a given country at two time points *t1* and *t0* be denoted by  and , respectively. The difference in the environmental burdens associated with FLW between the two periods can then be calculated as:

Different algebraic rearrangements yield different SDA decomposition results. We adopt the polar decomposition approach, under which . This allows two alternative decomposition forms to be derived as follows:

Taking the average of the two forms, that is, applying the two stage polar average decomposition method, yields:

(+)

Following the approach of Liu Ruixiang et al. (2017), the Leontief inverse matrix is decomposed into three components: the domestic multiplier coefficient matrix, the feedback coefficient matrix, and the spillover coefficient matrix, such that , where *，，*, and  and  denote the diagonal matrices formed by the main diagonal elements of matrices *A* and *B*, respectively. Accordingly, FLW can be decomposed into three components: FLW domestic multiplier effect, FLW feedback effect, FLW transfer effect.

，，

 represents the domestic Leontief inverse matrix and captures the domestic multiplier effect arising from the use of domestically produced intermediate inputs in country *s*.  represents the feedback effect, reflecting the impact on country *s* generated by the use of imported intermediate products.  denotes the transfer effect of FLW, referring to the external effects generated when a country exports intermediate products to foreign economies.

Correspondingly, *Y* can be decomposed into three components: consumption (), investment (), and exports (). Accordingly, FLW can be decomposed into three effects: the consumption expansion effect, the investment expansion effect, and the export expansion effect. The export expansion effect is further decomposed into the component associated with exports for final consumption () and the component associated with exports of capital goods or production inputs ():

Accordingly, changes in FLW in a given country can be decomposed as follows:

Here, 、、、、、、) denote, respectively, FLW direct effect、FLW domestic multiplier effect、FLW feedback effect、FLW transfer effect、Domestic consumption expansion effect、Domestic investment expansion effect、Export-driven consumption effect、Export-driven investment effect。

# FLW Responsibility allocation：CBA & PBA

In global accounting of responsibility for FLW, two main allocation approaches are commonly used: production-based accounting (PBA) and consumption-based accounting (CBA). These approaches assign responsibility in markedly different ways.

Under PBA, responsibility for FLW is fully attributed to the country where food is produced. Exporting countries therefore account not only for losses and waste associated with domestic consumption, but also for those arising from production to supply exports. This framing underscores the importance of improving efficiency and technology on the production side, but it can also place a disproportionate burden on agricultural exporting countries, particularly low income, agriculture-dependent economies.

Here, denotes food loss caused by domestic production. It is measured as reductions in the quantity of edible food intended for human consumption. These reductions occur during primary production, post-harvest handling and storage, and processing. denotes food waste caused by domestic consumption. It refers to food discarded during distribution, retail and consumption. It is closely linked to retailer and consumer behaviors.

By contrast, CBA reallocates FLW across borders through international trade. It focuses on the trade-embodied part of production-stage FLW. If food is produced for export and ultimately consumed in an importing country, the associated production-stage FLW is assigned to the importing country. The assignment follows the direction of trade flows. In this way, the exporting country incurs the direct production losses. However, responsibility is shifted to the final consuming country. This approach highlights the role of consumer demand in driving global FLW. It also makes the implied responsibility of high-income importing countries more visible, especially when consumption is excessive.

Here, denotes production-stage food loss from food produced for domestic consumption in country *i*. denotes production-stage food loss that occurs in the exporting country *j*, for food produced to meet consumption in country *i*.

This difference in allocation affects more than responsibility estimates. It also changes how environmental and economic losses are assessed. Under PBA, the multi-dimensional impacts of FLW are concentrated in producing countries. These impacts include losses of water and land resources, greenhouse-gas emissions, and economic costs. Under CBA, the embedded environmental footprints and economic losses are attributed to importing countries. This shift changes national FLW intensity indicators. It changes the loss associated with each unit of consumption. As a result, the same trade-driven FLW can imply different patterns of equity. PBA highlights the environmental and economic burdens borne by producing countries. CBA instead stresses how consumption patterns drive global resource use and environmental pressure.

Building on this divergence, we compare multi-dimensional losses under PBA and CBA. We consider resource losses (for example, water and land), environmental burdens (greenhouse-gas emissions), and economic impacts (potential environmental costs and direct economic losses). Our aim is to identify systematic biases in FLW responsibility allocation under international trade. We also assess how these accounting choices shape the estimated gap to SDG 12.3. This comparison helps clarify both the direction and the magnitude of responsibility shifts. It also provides empirical evidence to support fairer burden-sharing mechanisms for FLW reduction. Such mechanisms are needed to better achieve SDG 12.3.

# Equity assessment

## Equity of FLW responsibility allocation

To quantify inequality in FLW responsibility across countries and food groups, we use the Gini coefficient as the main indicator. The Gini coefficient was originally developed to measure income inequality. It ranges from 0 to 1. Higher values indicate a more unequal distribution.

In this study, we weight countries by population. We construct a population-weighted Lorenz curve using per-capita FLW as the allocation variable, and then compute the Gini coefficient. This approach provides a clear view of how concentrated global FLW reduction responsibility is across countries. The Gini coefficient is given by:

Here, denotes the Lorenz curve. It describes the relationship between the cumulative population share, 𝑥, and the cumulative share of responsibility. In practice, we use national population as the weight and total FLW as the allocation variable. Countries are ranked in ascending order of GDP per capita. After discretization, the Gini coefficient can be written as:

Here, is the cumulative share of population, and is the cumulative share of responsibility. denotes the population of country *j*, and denotes its total FLW. This metric quantifies the equity gap in the global allocation of FLW responsibility. When GG approaches 0, responsibility is more evenly distributed. When GG approaches 1, responsibility is highly concentrated in a small number of countries. By comparing CBA and PBA, we identify differences in overall responsibility allocation. We also reveal structural inequality across food groups driven by trade. These results provide key quantitative evidence for assessing equity in progress towards SDG 12.3.

# Target allocation schemes based on distributive justice

## Target allocation schemes

To evaluate the efficiency of food loss and waste (FLW) reduction across countries under different scenarios, we design four responsibility allocation schemes based on principles of justice. The aim is to assess national progress toward SDG 12.3 from a more equitable perspective, rather than relying solely on the single global target of halving FLW. This framework also responds to the core principle of “common but differentiated responsibilities and respective capabilities” emphasized in SDG 17. Specifically, the four schemes include: (i) the contribution responsibility scheme, which highlights direct responsibility arising from current consumption patterns; (ii) the capacity responsibility scheme, which accounts for differences in economic and institutional development and assigns greater obligations to countries with stronger capacities; (iii) the historical responsibility scheme, which incorporates long-term accumulated waste footprints, drawing on the logic of historical equity widely applied in climate governance; and (iv) the sharing responsibility scheme, which integrates contribution, capability, and historical responsibility using the entropy-weight method. This integrated scheme reduces bias associated with any single dimension and provides a more comprehensive and objective allocation framework. By comparing these four responsibility allocation schemes, the study systematically reveals how responsibility sharing differs under alternative equity principles and identifies countries that may be under- or over-burdened under existing pathways. This analysis provides stronger theoretical support for enhancing both the equity and feasibility of achieving SDG 12.3.

- - 1. **Contribution Principle**

Following the “polluter pays” principle, countries with higher current levels of food waste should assume larger reduction obligations. This approach highlights the direct responsibility of consumption patterns and emphasizes the idea that those who waste more should bear greater responsibility. It helps prevent high-consumption countries from shifting reduction costs while continuing to place excessive pressure on global resources. The core logic of this scheme is to directly link current waste intensity to future responsibility shares, thereby revealing a positive association between waste behavior and responsibility allocation in cross-country comparisons. In practice, such an allocation framework encourages high-waste countries to prioritize reduction policies and improves resource efficiency within food systems.

Under the contribution-based principle, the share of FLW reduction responsibility assigned to country *i* is defined as:

Here, denotes the total reduction required to achieve the global target; represents the final food loss and waste of country *i* in 2022; and is the sum of baseline FLW across all countries, which serves as the normalization denominator.

- - 1. **Contribution Principle**

Under the capability-based principle, countries with higher income levels and more advanced development are assigned greater FLW reduction responsibilities. The core of this approach is to establish an equal baseline and then adjust responsibilities according to cross-country differences in economic development, ensuring that obligations are not excessively concentrated in a small number of powerful countries but are instead distributed fairly within an overall equity framework. The theoretical basis of this principle draws on the concept of “common but differentiated responsibilities and respective capabilities” (CBDR-RC) in global governance. It recognizes that countries with stronger economic capacity are better positioned to contribute through financing, technological support, and policy innovation. As a result, this principle not only helps ease tensions in global responsibility sharing but also provides policy and resource flexibility for low income countries.

Here, denotes the Human Development Index of country *i* (range: 0–1). This index integrates life expectancy at birth, educational attainment, and gross national income per capita, providing a comprehensive measure of a country’s socioeconomic development level.

Human Development Index data were obtained from the Human Development Report published by the United Nations Development Programme (UNDP). HDI is a composite indicator covering three dimensions—life expectancy at birth, education, and gross national income per capita—with higher values indicating higher levels of human development. The dataset covers more than 190 countries and regions and has been updated annually since 1990, with the most recent release for 2022/2023. The data are available through the UNDP Human Development Data Center: <https://hdr.undp.org/data-center>。

- - 1. **Historical Responsibility Principle**

Under the principle of historical responsibility, the accumulated footprints of long-term high-consumption and high-waste countries are incorporated into current responsibility sharing. This logic closely parallels the concept of “historical emissions responsibility” in climate governance, emphasizing that the long-term occupation of global public resources during a country’s development cannot be ignored. By accounting for cumulative historical food waste, this approach helps correct inequities arising from responsibility shifting and prevents high-waste countries from externalizing the costs of past consumption onto others. Such an allocation framework reflects the principle of intergenerational equity and provides a responsibility assessment approach for future global food system governance that is aligned with climate governance practices.

Here, represents the cumulative amount of food loss and waste in country *i* over the period 2010–2022.

- - 1. **Shared Responsibility Principle**

The shared responsibility scheme jointly considers responsibilities on both the production and consumption sides and incorporates capability and historical dimensions. We apply the entropy weight method (EWM) to objectively determine indicator weights from multi-source data. The main advantage of this approach is that it avoids subjective weighting and assigns greater influence to indicators with higher information variability, thereby improving the scientific robustness and acceptability of the allocation results. The principle of shared responsibility reflects a multidimensional equity logic. It neither places excessive burdens on less developed countries due to limited capacity nor allows high-waste countries to evade obligations because of historical legacies. This framework emphasizes horizontal fairness among countries and vertical fairness across generations, offering an integrated approach for building a global food loss and waste governance system that balances both efficiency and equity.

Here, *,,*and denote the weights of the respective indicators, as determined using the entropy weight method.

- 1. **Scheme Comparison**

To compare the overall performance of different responsibility-sharing schemes under the three justice principles of contribution, capability, and historical responsibility, this study builds on the three single-principle schemes (the contribution responsibility scheme, the capacity responsibility scheme, and the historical responsibility scheme) and further develops two evaluation indicators: multi-dimensional consistency and principle balance. Both indicators are derived from rank correlations among the schemes, do not rely on subjective weighting, and are entirely data-driven.

- - 1. **Multi-Dimensional Consistency Indicator**

First, to assess the overall alignment of each responsibility-sharing scheme with the three single-principle schemes, we construct a multi-dimensional consistency indicator using Spearman’s rank correlation coefficient. Let the allocation results of a given scheme *,* and the rankings under the three single principles be , and . For scheme k and principle *p∈{C,A,H}* (representing contribution, capability, and historical responsibility, respectively), the Spearman rank correlation coefficient is calculated as:

The consistency of scheme *k* with each of the three principles is then measured by the Spearman coefficients*,*, and :

Here, denotes the rank of country *i* under principle (i.e., C, A, or H). Based on this, multi-dimensional consistency is defined as the arithmetic mean of the three correlations:

*+ + )*

A higher value of this indicator indicates that scheme *k* better reflects all three justice principles in the ranking of country responsibilities, demonstrating a stronger foundation of multi-dimensional equity.

- - 1. **Principle Balance Indicator**

Second, to further identify whether a scheme disproportionately favors any single principle, we construct a principle balance indicator based on the dispersion of the three Spearman correlation coefficients. Specifically, the standard deviation of , , and is used to measure the degree of skewness of scheme *k* across the three principles:

Here, is the mean of the three correlation coefficients, corresponding to the multi-dimensional consistency indicator. A smaller standard deviation indicates that the scheme maintains a more balanced relationship across the three principles, without sacrificing alignment with any principle due to a strong correlation in another, thereby reflecting higher overall principle coordination.

By combining these two complementary indicators, the study evaluates each responsibility-sharing scheme in terms of both overall alignment with the three principles and balance among principles, providing a rigorous quantitative basis for comparing the equity features of different responsibility allocation pathways.

# Scenario simulation analysis

## Scenario analysis model

To explore the dynamic mechanisms of FLW at the global scale, we develop a scenario analysis framework based on a multi-regional input–output (MRIO) framework. This framework enables a systematic representation of how changes in final demand propagate through successive stages of the supply chain, including agricultural production, food processing, wholesale circulation, and retail distribution, and are gradually transmitted and amplified. In this way, it reveals the pathways and magnitudes of FLW under different policy interventions and consumption patterns. The core structure of the model is expressed as follows.

In this formulation, denotes the total amount of food loss and waste. represents the direct FLW intensity matrix, which measures direct food loss and waste per unit of output. denotes the Leontief inverse matrix, which captures intersectoral dependencies and indirect effects across industries within the food supply chain. represents the vector of final demand in the economy, including household consumption and government expenditure.

Based on this model, the transmission effects of FLW across different stages of the food supply chain can be quantitatively assessed within a multi-regional and multi-sectoral system. The framework further allows us to evaluate changes in FLW under different scenario settings, such as dietary structure shifts, policy interventions, and trade adjustments. In other words, the model not only reveals the distributional characteristics of FLW along global supply chains, but also provides a scientific basis for designing targeted FLW reduction policies and sustainable development strategies.

## Scenario Settings

To systematically assess changes in food loss and waste (FLW) under different policy interventions and economic development pathways, and to examine their mechanisms of influence on resource use and environmental impacts, we develop a scenario simulation framework based on structural decomposition analysis (SDA). The scenario design is structured around three key variables. The first is FLW intensity (A_flw), which represents the level of food loss and waste generated per unit of consumption and captures both structural and behavioral characteristics of the food system. The second variable is technological progress (B), which reflects production efficiency and sources of risk within the food system. The third variable is final demand (C), which represents consumption expansion driven by population growth and economic development.

FLW intensity (A_flw) incorporates structural and behavioral factors within the food system, including nutritional transition and dietary structure transformation. In line with the FLW reduction targets proposed by the United Nations, we define two levels of reduction potential, namely low reduction at 10% and high reduction at 50%. We further differentiate mitigation pathways across different stages of the food system, including Agricultural Production, Post-harvest handling and storage, Manufacturing, Distribution and Retail, and Consumption, as well as integrated whole supply chain governance. These scenarios are designed to evaluate the potential environmental benefits of FLW control measures across the entire supply chain. For the technological progress variable (B), we specify scenario parameters based on the three effects identified through SDA decomposition.

We characterize technological progress (B) through three SDA-based effects. First, the self-sufficiency ratio (L) is used to measure internal supply capacity within the food system and reflects the contribution of technological progress, improvements in agricultural productivity, and optimized resource use to national food security. Second, import dependency (M) captures the sensitivity of the food system to international market fluctuations and reflects external risks and vulnerabilities under conditions of globalization. Third, trade dependence (N) describes the degree to which the food system is embedded within the overall economic structure at the macro level. This indicator highlights that food supply and demand are influenced not only by direct imports, but also by indirect shocks transmitted through cross-sectoral and cross-border economic linkages. Final demand (C) represents changes in consumption and investment demand associated with population growth and economic expansion. We incorporate gross domestic product projections from the International Monetary Fund World Economic Outlook Database April 2024 as the driving force of consumption expansion to construct final demand growth scenarios for different countries and regions up to 2030. This approach enables the dynamic representation of the demand-side impacts of economic growth on the food system.

Based on these settings, we construct a total of eight scenario layers and 23 scenario combinations, as summarized in Table S4. These scenarios capture interactive pathways across dietary structures, FLW reduction intensity, supply chain stages, technological progress, and consumption and investment expansion trends. Simulation results reveal the structural contributions and dominant driving factors of FLW changes under different scenarios, providing quantitative evidence to support global food system transformation, improved resource use efficiency, and mitigation of environmental pressures. In particular, the findings offer important insights into waste reduction pathways relevant to achieving the Sustainable Development Goals, including Zero Hunger (SDG 2) and Responsible Consumption and Production (SDG 12).

**TableS4 Scenario parameter setting**

| **Scenario** | | **FLW intensity (A_flw)** | | | | | | | **B** | | | **Final demand (C)** | | |
| --- | --- | --- | --- | --- | --- | --- | --- | --- | --- | --- | --- | --- | --- | --- |
| **Scenario category** | **Scenario intensity** | **Nutrition**  **structure** | **Dietary structure** | **Food supply chain stages** | | | | | **L:**  **Self-sufficiency** | **M:Import dependency** | **N:Trade dependency** | **Consumption structure** | **Investment structure** | **Demand scale** |
| **P1** | **P2** | **P3** | **P4** | **P5** |
| **S1**  **Baseline scenario** | **-** | Based on 2022 structure | | No FLW reduction measures | | | | | Based on 2022 structure | | | Based on 2022 structure | | 2030 projected value |
| **S2**  **Dietary guideline scenario** | **-** | Sustainable healthy diets | Based on 2022 structure | No FLW reduction measures | | | | | Based on 2022 structure | | | Based on 2022 structure | | 2030 projected value |
| **S3**  **Dietary structure transition scenario** | **-** | Based on 2022 structure | Dietary structure transition | No FLW reduction measures | | | | | Based on 2022 structure | | | Based on 2022 structure | | 2030 projected value |
| **S4**  **FLW reduction scenario** | **S4.a1**  **(Low)** | Based on 2022 structure | Based on 2022 structure | -10% | No FLW reduction measures | | | | Based on 2022 structure | | | Based on 2022 structure | | 2030 projected value |
| **S4.a2**  **(High)** | -50% |
| **S4.b1**  **(Low)** | No FLW reduction measures | -10% | No FLW reduction measures | | |
| **S4.b2**  **(High)** | -50% |
| **S4.c1**  **(Low)** | No FLW reduction measures | | -10% | No FLW reduction measures | |
| **S4.c2**  **(High)** | -50% |
| **S4.d1**  **(Low)** | No FLW reduction measures | | | -10% | No FLW reduction measures |
| **S4.d2**  **(High)** | -50% |
| **S4.e1**  **(Low)** | No FLW reduction measures | | | | -10% |
| **S4.e2**  **(High)** | -50% |
| **S4.f1**  **(Low)** | -10% | | | | |
| **S4.f2**  **(High)** | -50% | | | | |
| **S5**  **Technical coefficient adjustment scenarios** | **S5.a** | Based on 2022 structure | | No FLW reduction measures | | | | | 2030 projected value | Based on 2022 structure | Based on 2022 structure | Based on 2022 structure | | 2030 projected value |
| **S5.b** | Based on 2022 structure | 2030 projected value | Based on 2022 structure |
| **S5.c** | Based on 2022 structure | Based on 2022 structure | 2030 projected value |
| **S5.d** | 2030 projected value | | |
| **S6**  **Consumption transition scenario** | **-** | Based on 2022 structure | | No FLW reduction measures | | | | | Based on 2022 structure | | | 2030 projected value | Based on 2022 structure | 2030 projected value |
| **S7**  **Investment transition scenario** | **-** | Based on 2022 structure | | No FLW reduction measures | | | | | Based on 2022 structure | | | Based on 2022 structure | 2030 projected value | 2030 projected value |
| **S8**  **Synergy scenarios** | **S8.a1**  **(Weak)** | Sustainable healthy diets | Dietary structure transition | -10% | | | | | 2030 projected value | | | 2030 projected value | | 2030 projected value |
|  | **S8.a2**  **(Strong)** | Sustainable healthy diets | Dietary structure transition | -50% | | | | | 2030 projected value | | | 2030 projected value | | 2030 projected value |
| **Data source** | | | | | | | | | | | | | | |
| **Nutrition structure** | | Based on relevant research data from Willett et al. (2019) published in The Lancet72 | | | | | | | | | | | | |
| **Food structure** | | Based on dietary structure from the FAO Food Balance Sheets (FBS) in 202276 | | | | | | | | | | | | |
| **Reduction intensity** | | Parameter settings for FLW scenario simulations are adapted from Li et al. (2021), published in Nature Food13 | | | | | | | | | | | | |
| **Self-sufficiency** | | The 2030 structure is projected based on historical structures from 2010 to 2022 derived from the EXIOBASE database. | | | | | | | | | | | | |
| **Import dependency** | | The 2030 structure is projected based on historical structures from 2010 to 2022 derived from the EXIOBASE database. | | | | | | | | | | | | |
| **Trade dependency** | | The 2030 structure is projected based on historical structures from 2010 to 2022 derived from the EXIOBASE database. | | | | | | | | | | | | |
| **Consumption structure** | | Based on consumption structure from the Exiobase database77 | | | | | | | | | | | | |
| **Investment structure** | | Based on investment structure from the Exiobase database77 | | | | | | | | | | | | |
| **Demand scale** | | Based on GDP growth rates projected by the IMF75 | | | | | | | | | | | | |
| **Population in 2030** | | Based on World Population Prospects 2024 Revision (WPP 2024) released by the Population Division of the United Nations Department of Economic and Social Affairs. This dataset provides annual estimates and projections from 1950 to 2100, covering 237 countries and regions worldwide. Projections are based on multiple demographic scenarios. We adopt the “Medium variant” as the final population size figure. | | | | | | | | | | | | |

Notes:

P1: Agricultural Production; P2: Post-harvest handling And storage; P3: Manufacturing; P4: Distribution and Retail; P5: Consumption.

Structure transition is achieved by assuming structural convergence of each income group toward the next higher income group, while high-income countries remain unchanged. Specifically, low income countries adopt the structural pattern of lower middle income countries; Lower middle income countries follow the trajectory of upper middle income countries; and upper middle income countries converge toward the structure of high-income countries. For example, under dietary structural transformation, it is assumed that low income countries will adopt the same food consumption patterns by 2030 as currently observed in lower middle income countries, with similar assumptions applied sequentially to each income group.

Table S5. Overview of scenarios and key characteristics

| Scenario code | Scenario name | Key characteristics |
| --- | --- | --- |
| S1 | Baseline scenario | All structures and parameters remain at 2022 levels |
| S2 | Dietary guideline scenario | Adoption of sustainable healthy diets |
| S3 | Dietary structure transition scenario | Stepwise dietary structure transition by income group |
| S4.a1 | Production stage low FLW reduction scenario | 10% FLW reduction at production stage (P1) |
| S4.a2 | Production stage high FLW reduction scenario | 50% FLW reduction at production stage (P1) |
| S4.b1 | Post-harvest stage low FLW reduction scenario | 10% FLW reduction at post-harvest stage (P2) |
| S4.b2 | Post-harvest stage high FLW reduction scenario | 50% FLW reduction at post-harvest stage (P2) |
| S4.c1 | Manufacturing stage low FLW reduction scenario | 10% FLW reduction at Manufacturing stage (P3) |
| S4.c2 | Manufacturing stage high FLW reduction scenario | 50% FLW reduction at Manufacturing stage (P3) |
| S4.d1 | Distribution stage low FLW reduction scenario | 10% FLW reduction at distribution stage (P4) |
| S4.d2 | Distribution stage high FLW reduction scenario | 50% FLW reduction at distribution stage (P4) |
| S4.e1 | Consumption stage low FLW reduction scenario | 10% FLW reduction at consumption stage (P5) |
| S4.e2 | Consumption stage high FLW reduction scenario | 50% FLW reduction at consumption stage (P5) |
| S4.f1 | Whole FSC low FLW reduction scenario | 10% FLW reduction across all stages of the food supply chain (P1-P5) |
| S4.f2 | Whole FSC high FLW reduction scenario | 50% FLW reduction across all stages of the food supply chain (P1-P5) |
| S5.a | Self-sufficiency transition scenario | Technical coefficient adjustments reflecting changes in self-sufficiency |
| S5.b | Import dependency adjustment scenario | Technical coefficient adjustments reflecting changes in import dependency |
| S5.c | Trade dependency adjustment scenario | Technical coefficient adjustments reflecting changes in trade dependency |
| S5.d | Integrated technical coefficient adjustment scenarios | Technical coefficient adjustments reflecting changes in self-sufficiency, import dependency, and trade dependency based on 2030 projections |
| S6 | Consumption transition scenario | Stepwise consumption structure transition by income group |
| S7 | Investment transition scenario | Stepwise investment structure transition by income group |
| S8.a1 | Weak synergy scenario | Combined changes in diet, technology, consumption, and investment, with low FLW reduction (10%). |
| S8.a2 | Strong synergy scenario | Combined changes in diet, technology, consumption, and investment, with high FLW reduction (50%). |

Notes: All scenarios adopt the projected 2030 demand scale. FLW reduction is applied at specific supply-chain stages or across the whole food supply chain. Technical coefficient adjustment scenarios modify the intermediate input matrix of the input output table, and synergy scenarios integrate multiple structural transitions with FLW reduction.

# Data

## Food Loss and Waste Data

We use the Food Balance Sheets (FBS) from the FAOSTAT database and classify countries and regions according to the United Nations geographical classification system. All countries and regions are identified using standard country or area codes based on the M49 classification (Data S1). The 184 countries reported in the FBS are mapped to the 49 countries and regions represented in the EXIOBASE database (Table S6).

The Food Balance Sheets are statistical tools compiled by the Food and Agriculture Organization of the United Nations to comprehensively quantify food production, trade, transformation, and consumption within a country or region over a given period. The FBS records the availability of food and agricultural products, their sources such as domestic production and imports, their uses including food consumption, feed, and industrial applications, as well as final consumption levels. Previous studies have applied the FBS to analyze global agricultural trade and its associated environmental impacts31-32.

EXIOBASE is a global multi-regional input output database developed under several European Union projects, including EXIOPOL, CREEA, and DESIRE22-24. It covers 44 individual countries and a rest-of-the-world region, forming a unified global MRIO framework. The database is designed to support the analysis of environmental pressures and footprints associated with 200 products and 163 industries24-25. EXIOBASE attributes direct domestic energy use and environmental impacts to the originating products and industries and provides an extensive set of satellite accounts comprising more than 309 indicators that cover energy use, emissions, and resource extraction26. Previous studies have widely used EXIOBASE to investigate environmental pressures associated with global consumption and international trade27-30.

Table S6 Countries in the FAOSTAT mapped to the EXIOBASE

| Country/region abbreviation | Country/region in EXIOBASE | Country in FBS | M49 Code |
| --- | --- | --- | --- |
| AT | Austria | Austria | 40 |
| BE | Belgium | Belgium | 56 |
| BG | Bulgaria | Bulgaria | 100 |
| CY | Cyprus | Cyprus | 196 |
| CZ | Czech Republic | Czechia | 203 |
| DE | Germany | Germany | 276 |
| DK | Denmark | Denmark | 208 |
| EE | Estonia | Estonia | 233 |
| ES | Spain | Spain | 724 |
| FI | Finland | Finland | 246 |
| FR | France | France | 250 |
| GR | Greece | Greece | 300 |
| HR | Croatia | Croatia | 191 |
| HU | Hungary | Hungary | 348 |
| IE | Ireland | Ireland | 372 |
| IT | Italy | Italy | 380 |
| LT | Lithuania | Lithuania | 440 |
| LU | Luxembourg | Luxembourg | 442 |
| LV | Latvia | Latvia | 428 |
| MT | Malta | Malta | 470 |
| NL | Netherlands | Netherlands (Kingdom of the) | 528 |
| PL | Poland | Poland | 616 |
| PT | Portugal | Portugal | 620 |
| RO | Romania | Romania | 642 |
| SE | Sweden | Sweden | 752 |
| SI | Slovenia | Slovenia | 705 |
| SK | Slovakia | Slovakia | 703 |
| GB | United Kingdom | United Kingdom of Great Britain and Northern Ireland | 826 |
| US | United States | United States of America | 840 |
| JP | Japan | Japan | 392 |
| CN | China | China | 156 |
| CA | Canada | Canada | 124 |
| KR | South Korea | Republic of Korea | 410 |
| BR | Brazil | Brazil | 76 |
| IN | India | India | 356 |
| MX | Mexico | Mexico | 484 |
| RU | Russia | Russian Federation | 643 |
| AU | Australia | Australia | 36 |
| CH | Switzerland | Switzerland | 756 |
| TR | Turkey | Türkiye | 792 |
| TW | Taiwan | China, Taiwan Province of | 156 |
| NO | Norway | Norway | 578 |
| ID | Indonesia | Indonesia | 360 |
| ZA | South Africa | South Africa | 710 |
| WA | RoW Asia and Pacific | Afghanistan | 4 |
|  |  | Bangladesh | 50 |
|  |  | Bhutan | 64 |
|  |  | Solomon Islands | 90 |
|  |  | Myanmar | 104 |
|  |  | Cambodia | 116 |
|  |  | Sri Lanka | 144 |
|  |  | Fiji | 242 |
|  |  | French Polynesia | 258 |
|  |  | Kiribati | 296 |
|  |  | Kazakhstan | 398 |
|  |  | Kyrgyzstan | 417 |
|  |  | Lao People's Democratic Republic | 418 |
|  |  | Malaysia | 458 |
|  |  | Maldives | 462 |
|  |  | Mongolia | 496 |
|  |  | Nauru | 520 |
|  |  | Nepal | 524 |
|  |  | New Caledonia | 540 |
|  |  | Vanuatu | 548 |
|  |  | New Zealand | 554 |
|  |  | Micronesia (Federated States of) | 583 |
|  |  | Marshall Islands | 584 |
|  |  | Pakistan | 586 |
|  |  | Papua New Guinea | 598 |
|  |  | Philippines | 608 |
|  |  | Timor-Leste | 626 |
|  |  | Viet Nam | 704 |
|  |  | Tajikistan | 762 |
|  |  | Thailand | 764 |
|  |  | Tonga | 776 |
|  |  | Turkmenistan | 795 |
|  |  | Tuvalu | 798 |
|  |  | Uzbekistan | 860 |
|  |  | Samoa | 882 |
| WL | RoW America | Antigua and Barbuda | 28 |
|  |  | Argentina | 32 |
|  |  | Bahamas | 44 |
|  |  | Barbados | 52 |
|  |  | Bolivia (Plurinational State of) | 68 |
|  |  | Belize | 84 |
|  |  | Chile | 152 |
|  |  | Colombia | 170 |
|  |  | Costa Rica | 188 |
|  |  | Cuba | 192 |
|  |  | Dominica | 212 |
|  |  | Dominican Republic | 214 |
|  |  | Ecuador | 218 |
|  |  | El Salvador | 222 |
|  |  | Grenada | 308 |
|  |  | Guatemala | 320 |
|  |  | Guyana | 328 |
|  |  | Haiti | 332 |
|  |  | Honduras | 340 |
|  |  | Jamaica | 388 |
|  |  | Nicaragua | 558 |
|  |  | Panama | 591 |
|  |  | Paraguay | 600 |
|  |  | Peru | 604 |
|  |  | Saint Kitts and Nevis | 659 |
|  |  | Saint Lucia | 662 |
|  |  | Saint Vincent and the Grenadines | 670 |
|  |  | Suriname | 740 |
|  |  | Trinidad and Tobago | 780 |
|  |  | Uruguay | 858 |
|  |  | Venezuela (Bolivarian Republic of) | 862 |
| WE | RoW Europe | Albania | 8 |
|  |  | Bosnia and Herzegovina | 70 |
|  |  | Belarus | 112 |
|  |  | Iceland | 352 |
|  |  | Republic of Moldova | 498 |
|  |  | Montenegro | 499 |
|  |  | Serbia | 688 |
|  |  | Ukraine | 804 |
|  |  | North Macedonia | 807 |
| WF | RoW Africa | Algeria | 12 |
|  |  | Angola | 24 |
|  |  | Botswana | 72 |
|  |  | Burundi | 108 |
|  |  | Cameroon | 120 |
|  |  | Cabo Verde | 132 |
|  |  | Central African Republic | 140 |
|  |  | Chad | 148 |
|  |  | Comoros | 174 |
|  |  | Congo | 178 |
|  |  | Democratic Republic of the Congo | 180 |
|  |  | Benin | 204 |
|  |  | Ethiopia | 231 |
|  |  | Djibouti | 262 |
|  |  | Gabon | 266 |
|  |  | Gambia | 270 |
|  |  | Ghana | 288 |
|  |  | Guinea | 324 |
|  |  | Côte d’Ivoire | 384 |
|  |  | Kenya | 404 |
|  |  | Lesotho | 426 |
|  |  | Liberia | 430 |
|  |  | Libya | 434 |
|  |  | Madagascar | 450 |
|  |  | Malawi | 454 |
|  |  | Mali | 466 |
|  |  | Mauritania | 478 |
|  |  | Mauritius | 480 |
|  |  | Morocco | 504 |
|  |  | Mozambique | 508 |
|  |  | Namibia | 516 |
|  |  | Niger | 562 |
|  |  | Nigeria | 566 |
|  |  | Guinea-Bissau | 624 |
|  |  | Rwanda | 646 |
|  |  | Sao Tome and Principe | 678 |
|  |  | Senegal | 686 |
|  |  | Seychelles | 690 |
|  |  | Sierra Leone | 694 |
|  |  | Somalia | 706 |
|  |  | Zimbabwe | 716 |
|  |  | South Sudan | 728 |
|  |  | Sudan | 729 |
|  |  | Eswatini | 748 |
|  |  | Togo | 768 |
|  |  | Tunisia | 788 |
|  |  | Uganda | 800 |
|  |  | United Republic of Tanzania | 834 |
|  |  | Burkina Faso | 854 |
|  |  | Zambia | 894 |
| WM | RoW Middle East | Azerbaijan | 31 |
|  |  | Bahrain | 48 |
|  |  | Armenia | 51 |
|  |  | Georgia | 268 |
|  |  | Iraq | 368 |
|  |  | Israel | 376 |
|  |  | Jordan | 400 |
|  |  | Kuwait | 414 |
|  |  | Lebanon | 422 |
|  |  | Oman | 512 |
|  |  | Qatar | 634 |
|  |  | Saudi Arabia | 682 |
|  |  | Syrian Arab Republic | 760 |
|  |  | Yemen | 887 |

## Grouping of different economies

To further characterize differences in the roles of countries in the global allocation of FLW responsibility, we classify countries as net food exporting countries or net food importing countries based on trade data reported in the Food Balance Sheets compiled by the Food and Agriculture Organization of the United Nations. Specifically, a country is defined as a net food exporting country if its net exports of food and agricultural products are greater than zero, meaning that exports exceed imports. Conversely, a country is defined as a net food importing country if its net exports are less than zero, meaning that imports exceed exports. On the one hand, net food exporting countries tend to bear higher risks of food loss at the production stage and are also responsible for the environmental and resource consumption embodied in exported products. On the other hand, the consumption demand of net food importing countries directly drives large volumes of cross-border production and transportation, and consumption behavior plays a decisive role in consumption stage FLW. By distinguishing between major producing and net food importing countries, we can more clearly reveal differences in responsibility allocation under the production-based accounting (PBA) and consumption-based accounting (CBA) perspectives, thereby providing a solid analytical basis for evaluating the equity of FLW responsibility under international trade.

Because trade induced FLW and its associated resource burdens are unevenly distributed across economic strata, we further classify countries into different income groups within the framework of major producing and net food importing countries for additional analysis (Data S5). We use gross national income per capita calculated according to the World Bank Atlas method to assign countries to income groups. For the current 2025 fiscal year, low income economies are defined as those with a 2023 gross national income per capita of 1145 United States dollars or less. Lower middle income economies are defined as those with gross national income per capita between 1146 and 4515 United States dollars. Upper middle income economies are defined as those with gross national income per capita between 4516 and 14005 United States dollars. high-income economies are defined as those with gross national income per capita above 14005 United States dollars. The detailed country classifications are presented in Table S7.

Table S7 Economy category

| Economy | Code | Region | Country type | Income group |
| --- | --- | --- | --- | --- |
| Austria | AUT | Europe & Central Asia | Net food importing country | high-income |
| Belgium | BEL | Europe & Central Asia | Net food importing country | high-income |
| Bulgaria | BGR | Europe & Central Asia | Net food exporting country | high-income |
| Cyprus | CYP | Europe & Central Asia | Net food importing country | high-income |
| Czech Republic | CZE | Europe & Central Asia | Net food exporting country | high-income |
| Germany | DEU | Europe & Central Asia | Net food importing country | high-income |
| Denmark | DNK | Europe & Central Asia | Net food exporting country | high-income |
| Estonia | EST | Europe & Central Asia | Net food exporting country | high-income |
| Spain | ESP | Europe & Central Asia | Net food importing country | high-income |
| Finland | FIN | Europe & Central Asia | Net food importing country | high-income |
| France | FRA | Europe & Central Asia | Net food exporting country | high-income |
| Greece | GRC | Europe & Central Asia | Net food importing country | high-income |
| Croatia | HRV | Europe & Central Asia | Net food importing country | high-income |
| Hungary | HUN | Europe & Central Asia | Net food exporting country | high-income |
| Ireland | IRL | Europe & Central Asia | Net food importing country | high-income |
| Italy | ITA | Europe & Central Asia | Net food importing country | high-income |
| Lithuania | LTU | Europe & Central Asia | Net food exporting country | high-income |
| Luxembourg | LUX | Europe & Central Asia | Net food importing country | high-income |
| Latvia | LVA | Europe & Central Asia | Net food exporting country | high-income |
| Malta | MLT | Middle East & North Africa | Net food importing country | high-income |
| Netherlands | NLD | Europe & Central Asia | Net food importing country | high-income |
| Poland | POL | Europe & Central Asia | Net food exporting country | high-income |
| Portugal | PRT | Europe & Central Asia | Net food importing country | high-income |
| Romania | ROU | Europe & Central Asia | Net food exporting country | high-income |
| Sweden | SWE | Europe & Central Asia | Net food importing country | high-income |
| Slovenia | SVN | Europe & Central Asia | Net food importing country | high-income |
| Slovak Republic | SVK | Europe & Central Asia | Net food importing country | high-income |
| United Kingdom | GBR | Europe & Central Asia | Net food importing country | high-income |
| United States | USA | North America | Net food exporting country | high-income |
| Japan | JPN | East Asia & Pacific | Net food importing country | high-income |
| China | CHN | East Asia & Pacific | Net food importing country | Upper middle income |
| Canada | CAN | North America | Net food exporting country | high-income |
| Korea, Rep. | KOR | East Asia & Pacific | Net food importing country | high-income |
| Brazil | BRA | Latin America & Caribbean | Net food exporting country | Upper middle income |
| India | IND | South Asia | Net food exporting country | Lower middle income |
| Mexico | MEX | Latin America & Caribbean | Net food importing country | Upper middle income |
| Russian Federation | RUS | Europe & Central Asia | Net food exporting country | high-income |
| Australia | AUS | East Asia & Pacific | Net food exporting country | high-income |
| Switzerland | CHE | Europe & Central Asia | Net food importing country | high-income |
| Turkey | TUR | Europe & Central Asia | Net food importing country | Upper middle income |
| Taiwan, China | TWN | East Asia & Pacific | Net food importing country | high-income |
| Norway | NOR | Europe & Central Asia | Net food importing country | high-income |
| Indonesia | IDN | East Asia & Pacific | Net food exporting country | Upper middle income |
| South Africa | ZAF | Sub-Saharan Africa | Net food exporting country | Upper middle income |
| RoW Asia and Pacific |  |  | Net food importing country | Lower middle income |
| RoW America |  |  | Net food exporting country | Lower middle income |
| RoW Europe |  |  | Net food exporting country | Upper middle income |
| RoW Africa |  |  | Net food importing country | Low income |
| RoW Middle East |  |  | Net food importing country | Upper middle income |

## Social cost of carbon emissions embedded in FLW

To assess the economic losses associated with carbon emissions induced by FLW, we adopt national-level estimates of the social cost of carbon from Ricke et al. (2018)33. That study develops a high-resolution country-level social cost of carbon (CSCC) database, which quantifies the marginal economic damages caused by one metric ton of carbon dioxide emissions for individual countries under different climate models, economic scenarios, and discounting assumptions. The database incorporates five climate and economic damage function models, including the short-term and long-term versions of the BHM model and the DJO model. It explicitly accounts for uncertainties in climate projections and damage functions, and conducts simulations across multiple Representative Concentration Pathways (RCPs) and Shared Socioeconomic Pathways (SSPs). The results are reported in United States dollars per ton of CO2 and provide estimates at the 16.7%, 50%, and 83.3% quantiles. These estimates are widely applicable to carbon pricing, climate responsibility allocation, and the evaluation of economic losses from carbon emissions induced by activities such as FLW.

In this study, we select the parameter combination bhm_lr, representing the long-term climate and economic damage model, bootstrap to incorporate uncertainty in damage functions, climate set to uncertain to account for uncertainty in climate projections, SSP2 as a medium socioeconomic development pathway, and RCP6.0 as a medium emissions trajectory. This configuration reflects long-term climate impacts under realistic socioeconomic conditions while explicitly incorporating uncertainties from both model structure and climate projections. In addition, to evaluate the long-term environmental and economic impacts induced by FLW, we apply an endogenous discounting mechanism by setting the discount rate parameter dr to NA. This approach is based on the Ramsey discounting framework and captures the evolution of social time preference and diminishing marginal utility over time, which is more consistent with considerations of intergenerational equity and long-term impacts. Compared with fixed discount rate approaches, endogenous discounting provides stronger theoretical foundations for assessing long-term carbon externalities and has been widely adopted in the Stern Review and a range of climate and economic models. It is therefore well suited to the intertemporal evaluation of FLW-related emission losses in this study. Country and regional estimates of the social cost of carbon are reported in Table S8.

Table S8 Country-level social cost of carbon

| Economy | Code | Country-level social cost of carbon(Unit: US dollars/ton of CO2) |
| --- | --- | --- |
| Austria | AUT | 2.123516505 |
| Belgium | BEL | 2.289808901 |
| Bulgaria | BGR | 0.462820972 |
| Cyprus | CYP | 0.209840935 |
| Czech Republic | CZE | 1.554515307 |
| Germany | DEU | 15.28842543 |
| Denmark | DNK | 1.229302695 |
| Estonia | EST | 0.153501854 |
| Spain | ESP | 10.23705544 |
| Finland | FIN | 1.6147566 |
| France | FRA | 15.40486539 |
| Greece | GRC | 1.644233803 |
| Croatia | HRV | 0.46389694 |
| Hungary | HUN | 0.825465161 |
| Ireland | IRL | 0.802613864 |
| Italy | ITA | 10.88738625 |
| Lithuania | LTU | 0.298925269 |
| Luxembourg | LUX | 0.452858512 |
| Latvia | LVA | 0.167847793 |
| Malta | MLT | 0.172196856 |
| Netherlands | NLD | 3.421826246 |
| Poland | POL | 3.723525092 |
| Portugal | PRT | 1.188419459 |
| Romania | ROU | 1.018063208 |
| Sweden | SWE | 3.315899842 |
| Slovenia | SVN | 0.351295903 |
| Slovak Republic | SVK | 0.674796022 |
| United Kingdom | GBR | 12.30610929 |
| United States | USA | 213.699809 |
| Japan | JPN | 22.11634118 |
| China | CHN | 80.08146534 |
| Canada | CAN | 15.78719215 |
| Korea, Rep. | KOR | 7.857101671 |
| Brazil | BRA | 19.55207741 |
| India | IND | 47.31380102 |
| Mexico | MEX | 14.29780084 |
| Russian Federation | RUS | 15.07169338 |
| Australia | AUS | 11.25856543 |
| Switzerland | CHE | 2.183915376 |
| Turkey | TUR | 9.092469517 |
| Taiwan, China | TWN | 80.08146534 |
| Norway | NOR | 2.564155039 |
| Indonesia | IDN | 6.905629865 |
| South Africa | ZAF | 4.953348222 |
| RoW Asia and Pacific |  | 0.052400759 |
| RoW America |  | 2.492776035 |
| RoW Europe |  | 0.03282318 |
| RoW Africa |  | 1.865290084 |
| RoW Middle East |  | 0.08988447 |

Given the lack of valuation in the CSCC database for Malta, we select Cyprus, a Mediterranean island nation with similar geographical location, climate conditions, and economic development level, as an alternative representative. Both countries are members of the European Union and belong to high-income small economies, with strong comparability. The carbon social cost of the Row region is replaced by the average cost of the countries included in the region.

## SDG12.3 Allocation Schem

The SDG12.3 target values for each country under the equal target allocation scheme, as well as the contribution, capability, historical responsibility, and sharing responsibility allocation schemes, are shown in Table S9:

Table S9 Country-level social cost of carbon

| Economy | Average (SDG12.3) | Contribution | Capacity | Historical | Sharing | | |
| --- | --- | --- | --- | --- | --- | --- | --- |
| FLW | FL | FW |
| Austria | 50.00% | 54.58% | 54.82% | 52.57% | 54.71% | 55.92% | 54.21% |
| Belgium | 50.00% | 46.23% | 54.65% | 48.59% | 47.98% | 51.56% | 45.55% |
| Bulgaria | 50.00% | 24.99% | 38.86% | 22.10% | 24.75% | 24.18% | 26.02% |
| Cyprus | 50.00% | 66.52% | 66.52% | 66.19% | 66.52% | 63.37% | 68.97% |
| Czech Republic | 50.00% | 35.43% | 48.84% | 36.47% | 36.89% | 34.10% | 40.48% |
| Germany | 50.00% | 46.50% | 51.32% | 50.53% | 48.56% | 48.60% | 48.54% |
| Denmark | 50.00% | 43.88% | 56.55% | 44.20% | 45.70% | 42.98% | 47.60% |
| Estonia | 50.00% | 23.96% | 49.03% | 26.84% | 32.64% | 33.81% | 30.83% |
| Spain | 50.00% | 47.38% | 52.45% | 51.92% | 49.79% | 49.74% | 49.82% |
| Finland | 50.00% | 40.78% | 52.01% | 43.96% | 44.80% | 45.28% | 44.61% |
| France | 50.00% | 36.41% | 50.83% | 39.95% | 38.24% | 37.65% | 38.70% |
| Greece | 50.00% | 36.27% | 38.70% | 38.70% | 38.70% | 43.23% | 35.73% |
| Croatia | 50.00% | 31.23% | 37.17% | 37.17% | 37.17% | 43.39% | 30.87% |
| Hungary | 50.00% | 33.86% | 45.83% | 33.14% | 34.19% | 32.55% | 36.60% |
| Ireland | 50.00% | 58.14% | 64.90% | 52.96% | 57.00% | 63.75% | 55.06% |
| Italy | 50.00% | 45.06% | 45.19% | 45.19% | 45.19% | 49.09% | 43.38% |
| Lithuania | 50.00% | 16.80% | 42.66% | 19.67% | 20.46% | 20.58% | 20.20% |
| Luxembourg | 50.00% | 55.40% | 70.19% | 52.08% | 70.19% | 61.80% | 77.85% |
| Latvia | 50.00% | 11.38% | 38.75% | 14.45% | 17.57% | 18.55% | 14.61% |
| Malta | 50.00% | 69.84% | 69.84% | 69.84% | 69.84% | 72.31% | 68.60% |
| Netherlands | 50.00% | 52.81% | 59.69% | 52.73% | 53.14% | 54.47% | 51.82% |
| Poland | 50.00% | 39.51% | 47.88% | 37.88% | 39.07% | 37.12% | 44.34% |
| Portugal | 50.00% | 49.61% | 49.61% | 49.61% | 49.61% | 54.63% | 45.48% |
| Romania | 50.00% | 38.55% | 42.07% | 36.28% | 38.22% | 37.64% | 40.40% |
| Sweden | 50.00% | 46.36% | 59.62% | 50.20% | 49.65% | 48.59% | 50.07% |
| Slovenia | 50.00% | 44.89% | 51.69% | 49.55% | 51.69% | 72.18% | 39.43% |
| Slovak Republic | 50.00% | 41.53% | 49.59% | 43.11% | 44.37% | 42.04% | 47.30% |
| United Kingdom | 50.00% | 46.14% | 58.66% | 48.41% | 47.37% | 43.45% | 48.67% |
| United States | 50.00% | 49.16% | 37.25% | 48.25% | 48.64% | 49.17% | 48.05% |
| Japan | 50.00% | 43.68% | 43.68% | 43.68% | 43.68% | 45.39% | 42.25% |
| China | 50.00% | 45.58% | 39.25% | 50.30% | 47.84% | 46.97% | 48.32% |
| Canada | 50.00% | 41.12% | 64.29% | 42.11% | 41.69% | 41.30% | 42.21% |
| Korea, Rep. | 50.00% | 50.34% | 50.34% | 50.34% | 50.34% | 51.20% | 49.17% |
| Brazil | 50.00% | 32.04% | 55.04% | 32.34% | 32.16% | 32.28% | 31.38% |
| India | 50.00% | 51.48% | 63.26% | 51.73% | 51.55% | 52.62% | 51.30% |
| Mexico | 50.00% | 59.00% | 62.24% | 56.70% | 57.88% | 57.98% | 57.50% |
| Russian Federation | 50.00% | 39.52% | 48.44% | 39.69% | 39.56% | 40.23% | 36.87% |
| Australia | 50.00% | 43.00% | 65.51% | 44.79% | 43.96% | 44.99% | 41.62% |
| Switzerland | 50.00% | 50.65% | 59.29% | 51.15% | 52.77% | 47.82% | 58.45% |
| Turkey | 50.00% | 55.11% | 62.14% | 54.72% | 54.94% | 54.54% | 57.06% |
| Taiwan, China | 50.00% | 46.01% | 46.01% | 46.01% | 46.01% | 44.52% | 48.52% |
| Norway | 50.00% | 58.86% | 59.43% | 59.43% | 59.43% | 55.69% | 62.69% |
| Indonesia | 50.00% | 60.72% | 62.43% | 54.64% | 57.64% | 57.62% | 57.71% |
| South Africa | 50.00% | 53.28% | 68.02% | 54.24% | 53.89% | 56.37% | 51.71% |
| RoW Asia and Pacific | 50.00% | 53.22% | 42.77% | 53.41% | 53.25% | 52.20% | 56.28% |
| RoW America | 50.00% | 40.15% | 58.35% | 41.95% | 41.00% | 40.66% | 41.84% |
| RoW Europe | 50.00% | 20.63% | 35.88% | 27.18% | 23.94% | 24.24% | 23.37% |
| RoW Africa | 50.00% | 68.19% | 52.40% | 65.49% | 66.79% | 67.33% | 66.04% |
| RoW Middle East | 50.00% | 68.62% | 75.49% | 66.95% | 67.81% | 71.67% | 62.45% |

# Additional Tables and Figures

## Supplementary Tables

**Table S10 Nutritional and resource-environment-economic losses embedded in FLW by region in 2022 (CBA).**

| Total  land use (Mha) | Land use embedded in FLW  (Mha) | Total green  water use  (km3) | Green water use embedded in FLW (billion m3) | Total blue  water use  (km3) | Blue  water use embedded in FLW (billion m3) | Total  GHG emissions (MtCO2 eq) | GHG emissions embedded in FLW (MtCO2 eq) |
| --- | --- | --- | --- | --- | --- | --- | --- |
| 4641.4034 | 617.81  (13.31%) | 7142.735 | 2226.42  (31.17%) | 1131.035 | 263.50  (23.39%) | 42438.0034 | 2370.19  (5.59%) |

**Table S11 Comprehensive score of different allocation schemes.**

| Scheme | Avg. Corr. | Std. Corr. |
| --- | --- | --- |
| Contribution | 0.8225 | 0.1660 |
| Capacity | 0.8332 | 0.1645 |
| Historical | 0.8750 | 0.1095 |
| Sharing | 0.8771 | 0.1023 |

**Table S12 The average** SDG 12.3 target gap index (TGI) **for 23 scenarios under different schemes.**

| Scheme | Mean (%) | Median (%) | Min (%) | Max (%) | IQR (%) | Skewness | Kurtosis |
| --- | --- | --- | --- | --- | --- | --- | --- |
| Average | 105.98 | 114.56 | -68.87 | 276.07 | 51.01 | -0.97 | 4.19 |
| Contribution | 100.47 | 112.20 | -423.92 | 354.03 | 45.75 | -1.83 | 10.87 |
| Capacity | 101.11 | 114.91 | -423.92 | 354.03 | 52.90 | -1.64 | 8.99 |
| Historical | 99.95 | 112.74 | -423.92 | 351.48 | 46.27 | -1.89 | 10.90 |
| Sharing | 100.40 | 112.79 | -423.92 | 354.03 | 47.81 | -1.83 | 10.52 |

Table S13 SDG 12.3 target gap index (TGI) **for 23 scenarios under sharing responsibility scheme.**

| Scenario | Achieved | <25% | <50% | <75% | <100% |
| --- | --- | --- | --- | --- | --- |
| S1 | 1 | 2 | 2 | 2 | 8 |
| S2 | 34 | 44 | 48 | 49 | 49 |
| S3 | 1 | 2 | 3 | 6 | 13 |
| S4.a1 | 1 | 2 | 2 | 3 | 8 |
| S4.a2 | 2 | 2 | 4 | 6 | 19 |
| S4.b1 | 1 | 2 | 2 | 3 | 9 |
| S4.b2 | 2 | 2 | 3 | 4 | 18 |
| S4.c1 | 1 | 2 | 2 | 2 | 9 |
| S4.c2 | 2 | 2 | 2 | 6 | 19 |
| S4.d1 | 1 | 2 | 2 | 2 | 10 |
| S4.d2 | 2 | 2 | 2 | 5 | 16 |
| S4.e1 | 1 | 2 | 2 | 2 | 12 |
| S4.e2 | 2 | 2 | 4 | 13 | 32 |
| S4.f1 | 2 | 2 | 2 | 5 | 15 |
| S4.f2 | 14 | 26 | 39 | 48 | 49 |
| S5.a | 1 | 2 | 2 | 2 | 8 |
| S5.b | 1 | 2 | 2 | 2 | 8 |
| S5.c | 1 | 2 | 2 | 2 | 8 |
| S5.d | 1 | 2 | 2 | 2 | 8 |
| S6 | 1 | 1 | 1 | 3 | 7 |
| S7 | 1 | 1 | 2 | 2 | 8 |
| S8.a1 | 1 | 1 | 3 | 5 | 11 |
| S8.a2 | 13 | 27 | 38 | 48 | 49 |

# References

1. Fabi, C., Cachia, F., Conforti, P., English, A., & Moncayo, J. R. (2021). Improving data on food losses and waste: From theory to practice. Food Policy, 98, 101934.
2. Withanage, S. V., Dias, G. M., & Habib, K. (2021). Review of household food waste quantification methods: Focus on composition analysis. Journal of Cleaner Production, 279, 123722.
3. Raak, N., Symmank, C., Zahn, S., Aschemann-Witzel, J., & Rohm, H. (2017). Manufacturing-and product-related causes for food waste and implications for the food supply chain. Waste Management, 61, 461-472.
4. Dora, M., Biswas, S., Choudhary, S., Nayak, R., & Irani, Z. (2021). A system-wide interdisciplinary conceptual framework for food loss and waste mitigation strategies in the supply chain. Industrial Marketing Management, 93, 492-508.
5. Beretta, C., Stoessel, F., Baier, U., & Hellweg, S. (2013). Quantifying food losses and the potential for reduction in Switzerland. Waste Management, 33(3), 764-773.
6. Waste & Resources Action Programme (WRAP). (2009). Household food and drink waste in the UK.Bellὑ, L. G. (2017). Food losses and waste issues and policy options. FAO, September 2017.
7. Xue, L., Liu, G., Parfitt, J., et al. "Missing food, missing data? A critical review of global food losses and food waste data." Environmental Science & Technology, 2017, 51(12): 6618–6633.
8. Cabernard, Livia, and Stephan Pfister. "A highly resolved MRIO database for analyzing environmental footprints and Green Economy Progress." Science of the Total Environment 755 (2021): 142587.
9. Stadler, K., Wood, R., Bulavskaya, T., Södersten, C.-J., Simas, M., Schmidt, S., Usubiaga, A., Acosta-Fernández, J., Kuenen, J., Bruckner, M., Giljum, S., Lutter, S., Merciai, S., Schmidt, J. H., Theurl, M. C., Plutzar, C., Kastner, T., Eisenmenger, N., Erb, K.-H., … Tukker, A. (2021). EXIOBASE 3 (3.8.2) [Data set]. Zenodo.
10. Lenzen, M., Moran, D., Kanemoto, K. & Geschke, A. Building Eora: a global multi-region input–output database at high country and sector resolution. Econ. Syst. Res. 25, 20–49 (2013).
11. Aguiar, A., Chepeliev, M., Corong, E., McDougall, R., and van der Mensbrugghe, D. (2019). The GTAP Data Base: Version 10. Journal of Global Economic Analysis. v. 4, n. 1, p. 1-27, June 2019. ISSN 2377-2999.
12. Osei-Owusu A K, Read Q D, Thomsen M. Potential energy and environmental footprint savings from reducing food loss and waste in Europe: A scenario-based multiregional input–output analysis[J]. Environmental Science & Technology, 2023, 57(43): 16296-16308.
13. Xue, L., Liu, X., Lu, S. et al. China’s food loss and waste embodies increasing environmental impacts. Nat Food 2, 519–528 (2021).
14. Gatto, A., Chepeliev, M. Global food loss and waste estimates show increasing nutritional and environmental pressures. Nat Food 5, 136–147 (2024).
15. Guo, Y., Tan, H., Zhang, L. et al. Global food loss and waste embodies unrecognized harms to air quality and biodiversity hotspots. Nat Food 4, 686–698 (2023).
16. Read Q D, Brown S, Cuéllar A D, et al. Assessing the environmental impacts of halving food loss and waste along the food supply chain[J]. Science of the Total Environment, 2020, 712: 136255.
17. Zhu J, Luo Z, Sun T, et al. Cradle-to-grave emissions from food loss and waste represent half of total greenhouse gas emissions from food systems[J]. Nature Food, 2023, 4(3): 247-256.
18. Miao,G; Fortanier, F. Nowcast TiVA Estimates: Methodology. 2018
19. Valk, Serge, de, Mattos, Daiane, D, Ferreira, P. Nowcasting: An R Package for PredictingEconomic Variables Using Dynamic Factor Models. R / 2019, 11 (1), 230.
20. Wiebe, K. S.. Lenzen, M. To RAS or Not to RAS? What Is the Difference in Outcomes inMulti-Regional Input Output Models? Economic Systems Researth 2016, 28 (3), 383 402.
21. Chepeliev, M. (2022). Incorporating Nutritional Accounts to the GTAP Data Base. Journal of Global Economic Analysis.
22. Wood, R.; Stadler, K.; Simas, M.; Bulavskaya, T.; Giljum, S.; Lutter, S.; Tukker, A. Growth in Environmental Footprints and Environmental Impacts Embodied in Trade: Resource Efficiency Indicators from EXIOBASE3. J. Ind. Ecol 2018, 22 (3), 553– 564.
23. Tukker, A.; Wood, R.; Giljum, S. Relevance of Global Multi Regional Input Output Databases for Global Environmental Policy: Experiences with EXIOBASE 3. J. Industrial Ecology 2018, 22, 482– 484.
24. Stadler, K.; Wood, R.; Bulavskaya, T.; Södersten, C.-J. J.; Simas, M.; Schmidt, S.; Usubiaga, A.; Acosta-Fernández, J.; Kuenen, J.; Bruckner, M.; Giljum, S.; Lutter, S.; Merciai, S.; Schmidt, J. H.; Theurl, M. C.; Plutzar, C.; Kastner, T.; Eisenmenger, N.; Erb, K.-H. H.; de Koning, A.; Tukker, A. EXIOBASE 3: Developing a Time Series of Detailed Environmentally Extended Multi-Regional Input-Output Tables. J. Ind. Ecol 2018, 22 (3), 502– 515.
25. Wood, R.; Stadler, K.; Bulavskaya, T.; Lutter, S.; Giljum, S.; de Koning, A.; Kuenen, J.; Schütz, H.; Acosta-Fernández, J.; Usubiaga, A.; Simas, M.; Ivanova, O.; Weinzettel, J.; Schmidt, J. H.; Merciai, S.; Tukker, A. Global Sustainability Accounting-Developing EXIOBASE for Multi-Regional Footprint Analysis. Sustainability (Switzerland) 2015, 7 (1), 138– 163.
26. Merciai, S.; Schmidt, J. Methodology for the Construction of Global Multi-Regional Hybrid Supply and Use Tables for the EXIOBASE v3 Database. J. Ind. Ecol 2018, 22 (3), 516– 531.
27. Hamilton, H. A.; Ivanova, D.; Stadler, K.; Merciai, S.; Schmidt, J.; van Zelm, R.; Moran, D.; Wood, R. Trade and the Role of Non-Food Commodities for Global Eutrophication. Nat. Sustain 2018, 1 (6), 314– 321.
28. Boakes, Elizabeth H., et al. "Impacts of the global food system on terrestrial biodiversity from land use and climate change." Nature Communications 15.1 (2024): 5750.
29. Yang, Lan, et al. "Environmental-social-economic footprints of consumption and trade in the Asia-Pacific region." Nature communications 11.1 (2020): 4490.
30. Bruckner, Benedikt, et al. "Ecologically unequal exchanges driven by EU consumption." Nature sustainability 6.5 (2023): 587-598.
31. Gu, Weiyi, et al. "The asymmetric impacts of international agricultural trade on water use scarcity, inequality and inequity." Nature Water 2.4 (2024): 324-336.
32. Zhang, Haoran, et al. "Global environmental impacts of food system from regional shock: Russia-Ukraine war as an example." Humanities and Social Sciences Communications 11.1 (2024): 1-13.
33. Ricke, K., Drouet, L., Caldeira, K. et al. Country-level social cost of carbon. Nature Clim Change 8, 895–900 (2018).
34. Gatto, Alessandro, and Maksym Chepeliev. "Global food loss and waste estimates show increasing nutritional and environmental pressures." Nature Food 5.2 (2024): 136-147.
35. Wu, Bingfang, et al. "Quantifying global agricultural water appropriation with data derived from earth observations." Journal of Cleaner Production 358 (2022): 131891.
36. Zheng, L., Adalibieke, W., Zhou, F. et al. Health burden from food systems is highly unequal across income groups. Nat Food 5, 251–261 (2024).
37. Bellὑ, L. G. (2017). Food losses and waste issues and policy options, September 2017. FAO.
38. Ishangulyyev, R., Kim, S., & Lee, S. H. (2019). Understanding food loss and waste—Why are we losing and wasting food? Foods, 8(8), 297.
39. Alexander, P., Brown, C., Arneth, A., Finnigan, J., Moran, D., & Rounsevell, M.D. A. (2017). Losses, inefficiencies and waste in the global food system. Agricultural Systems, 153, 190–200.
40. Bellemare, M. F., Çakir, M., Peterson, H. H., Novak, L., & Rudi, J. (2017).On the measurement of food waste. American Journal of Agricultural Economics, 99(5), 1148–1158.
41. Kakadellis, S., Mao, S., Harwood, A. et al. State-level policies alone are insufficient to meet the federal food waste reduction goal in the United States. Nat Food 6, 196–204 (2025).
42. Woon K S, Phuang Z X, Lin Z, et al. A novel food waste management framework combining optical sorting system and anaerobic digestion: A case study in Malaysia[J]. Energy, 2021, 232: 121094.
43. Read Q D, Muth M K. Cost-effectiveness of four food waste interventions: Is food waste reduction a “win–win?”[J]. Resources, Conservation and Recycling, 2021, 168: 105448.
44. Spang E S, Moreno L C, Pace S A, et al. Food loss and waste: measurement, drivers, and solutions[J]. Annual Review of Environment and Resources, 2019, 44(1): 117-156.
45. Xue, L., Liu, X., Lu, S. et al. China’s food loss and waste embodies increasing environmental impacts. Nat Food 2, 519–528 (2021).
46. Crippa, M. et al. Food systems are responsible for a third of global anthropogenic GHG emissions. Nat. Food 2, 198–209 (2021).
47. Li, Y., Zhong, H., Shan, Y. et al. Changes in global food consumption increase GHG emissions despite efficiency gains along global supply chains. Nat Food 4, 483–495 (2023).
48. Wang, Y., Ying, H., Stefanovski, D. et al. Food waste used as a resource can reduce climate and resource burdens in agrifood systems. Nat Food 6, 478–490 (2025).
49. What a Waste 2.0: A Global Snapshot of Solid Waste Management to 2050 (World Bank, 2018);
50. Cattaneo, Andrea, et al. "Reducing food loss and waste: Five challenges for policy and research." Food Policy 98 (2021): 101974.
51. Totobesola, Mireille, et al. "A holistic approach to food loss reduction in Africa: food loss analysis, integrated capacity development and policy implications." Food Security 14.6 (2022): 1401-1415.
52. Food and Agriculture Organization of the United Nations. (2013). Food wastage footprint: Impacts on natural resources.
53. Tubiello, F. N. et al. Pre-and post-production processes increasingly dominate greenhouse gas emissions from agri-food systems. Earth Syst. Sci. Data 14, 1795–1809 (2022).
54. Greenhouse Gas Emissions From Agrifood Systems—Global, Regional and Country Trends, 2000–2020. FAOSTAT Analytical Brief Series No. 50 (FAO, 2022); https://www.fao.org/food-agriculture-statistics/data-release/data-release-detail/en/c/1616127/
55. Li, Y., Zhong, H., Shan, Y. et al. Changes in global food consumption increase GHG emissions despite efficiency gains along global supply chains. Nat Food 4, 483–495 (2023).
56. Zhu, J., Luo, Z., Sun, T. et al. Cradle-to-grave emissions from food loss and waste represent half of total greenhouse gas emissions from food systems. Nat Food 4, 247–256 (2023).
57. Searchinger, T., Waite, R., Hanson, C., & Ranganathan, J. (2019). Creating a Sustainable Food Future: A Menu of Solutions to Feed Nearly 10 Billion People by 2050. World Resources Institute.
58. Food and Agriculture Organization of the United Nations. (2021). The State of Food and Agriculture 2021: Making agrifood systems more resilient to shocks and stresses.
59. Read Q D, Brown S, Cuéllar A D, et al. Assessing the environmental impacts of halving food loss and waste along the food supply chain[J]. Science of the Total Environment, 2020, 712: 136255.
60. Fanzo, J. et al. Shining a Light to Spur Action on Nutrition (Global Nutrition Report, 2018); https://globalnutritionreport.org/reports/global-nutrition-report-2018/
61. FAO, IFAD, UNICEF, WFP and WHO. The State of Food Security and Nutrition in the World 2021. Transforming Food Systems for Food Security, Improved Nutrition and Affordable Healthy Diets for All (FAO, 2021).
62. Wang, X., Dou, Z., Feng, S. et al. Global food nutrients analysis reveals alarming gaps and daunting challenges. Nat Food 4, 1007–1017 (2023).
63. von Grebmer, K. et al. Global Hunger Index: The Challenge of Hidden Hunger (Welthungerhilfe, International Food Policy Research Institute and Concern Worldwide, 2014).
64. Black, R. E. et al. Maternal and child undernutrition: global and regional exposures and health consequences. Lancet 371, 243–260 (2008).
65. Stevens, G. A. et al. Trends and mortality effects of vitamin A deficiency in children in 138 low income and middle-income countries between 1991 and 2013: a pooled analysis of population-based surveys. Lancet Glob Health 35, 528–536 (2015).
66. Beal, T. et al. Global trends in dietary micronutrient supplies and estimated prevalence of inadequate intakes. PLoS One 12, e0175554 (2017).
67. Bell, W. et al. Global dietary convergence from 1970 to 2010 altered inequality in agriculture, nutrition and health. Nat. Food 2, 156–165 (2021).
68. Schmidhuber, J. et al. The Global Nutrient Database: availability of macronutrients and micronutrients in 195 countries from 1980 to 2013. Lancet Planet. Health 2, 353–368 (2018).
69. Eastham J, Creedon A. Food losses, food waste, and beyond in food supply chains: Retaining optimum nutrient density[J]. Food Frontiers, 2023, 4(3): 971-979.
70. United Nations Environment Programme (UNEP). (2024). Food Waste Index Report 2024. Nairobi: UNEP.
71. United Nations. (n.d.). Goal 17: Partnerships for the goals. United Nations.
72. Willett, Walter, et al. "Food in the Anthropocene: the EAT–Lancet Commission on healthy diets from sustainable food systems." The lancet 393.10170 (2019): 447-492.
73. European Commission (2024), The 2024 Ageing Report: Economic and Budgetary Projections for the EU Member States (2022–2070), Institutional Paper 253, Directorate-General for Economic and Financial Affairs, Brussels.
74. Asian Productivity Organization (2024), APO Productivity Databook 2024, APO, Tokyo.
75. International Monetary Fund. (2025). World Economic Outlook Databases. Washington, DC: IMF.
76. Food and Agriculture Organization of the United Nations. (2023). FAOSTAT: Food Balance Sheets (FBS). Rome: FAO.
77. Stadler, K., Wood, R., Bulavskaya, T., Södersten, C. J., Simas, M., Schmidt, S., ... & Tukker, A. (2018). EXIOBASE 3: Developing a time series of detailed environmentally extended multi-regional input-output tables. Journal of Industrial Ecology, 22(3), 502–515.
78. World Bank. (2025). World Development Indicators. Washington, DC: World Bank.
79. Crippa, Monica, et al. "Food systems are responsible for a third of global anthropogenic GHG emissions." Nature food 2.3 (2021): 198-209.
