# Supplementary material for: Synergistic pathways for reducing food loss and waste along the food supply chain reconcile SDG 12.3 with distributive justice
Source: Research Square preprint supplement (doi:10.21203/rs.3.rs-8465985/v1), 2026-01-28
Supplement: Supplementary file 2 [file f3d81b2e3f363ebb2cbc4566.xlsx]

## Sheet: Table of contents
Sheet	Description
Table S1 FLW EXIO countries	Shows how we mapped the EXIOBASE country to the FLW data region
Table S2 FBS EXIO industries	Shows how we mapped the EXIOBASE industries to the FBS food
Table S3 FSC EXIO industries	Shows how we mapped the EXIOBASE industries to different food supply chain stages
Table S4 FBS FAO food & countries	Shows how we mapped the countries and food of FAOSTAT bilateral trade matrix data to FBS data
Table S5 FLW EXIO industries	Shows how we intuitively mapped FLW of different foods under five food supply chain stages to different industries in the EXIOBASE database
Table S6 Economy category	Shows how we group different economies

## Sheet: Table S1 FLW EXIO countries
Countries in EXIOBASE		FBS country	M49 Code
AT	Austria	Austria	40
BE	Belgium	Belgium	56
BG	Bulgaria	Bulgaria	100
CY	Cyprus	Cyprus	196
CZ	Czech Republic	Czechia	203
DE	Germany	Germany	276
DK	Denmark	Denmark	208
EE	Estonia	Estonia	233
ES	Spain	Spain	724
FI	Finland	Finland	246
FR	France	France	250
GR	Greece	Greece	300
HR	Croatia	Croatia	191
HU	Hungary	Hungary	348
IE	Ireland	Ireland	372
IT	Italy	Italy	380
LT	Lithuania	Lithuania	440
LU	Luxembourg	Luxembourg	442
LV	Latvia	Latvia	428
MT	Malta	Malta	470
NL	Netherlands	Netherlands (Kingdom of the)	528
PL	Poland	Poland	616
PT	Portugal	Portugal	620
RO	Romania	Romania	642
SE	Sweden	Sweden	752
SI	Slovenia	Slovenia	705
SK	Slovakia	Slovakia	703
GB	United Kingdom	United Kingdom of Great Britain and Northern Ireland	826
US	United States	United States of America	840
JP	Japan	Japan	392
CN	China	China	156
CA	Canada	Canada	124
KR	South Korea	Republic of Korea	410
BR	Brazil	Brazil	76
IN	India	India	356
MX	Mexico	Mexico	484
RU	Russia	Russian Federation	643
AU	Australia	Australia	36
CH	Switzerland	Switzerland	756
TR	Turkey	Türkiye	792
TW	Taiwan	China, Taiwan Province of	156
NO	Norway	Norway	578
ID	Indonesia	Indonesia	360
ZA	South Africa	South Africa	710
WA	RoW Asia and Pacific	Afghanistan	4
		Bangladesh	50
		Bhutan	64
		Solomon Islands	90
		Myanmar	104
		Cambodia	116
		Sri Lanka	144
		Fiji	242
		French Polynesia	258
		Kiribati	296
		Kazakhstan	398
		Kyrgyzstan	417
		Lao People's Democratic Republic	418
		Malaysia	458
		Maldives	462
		Mongolia	496
		Nauru	520
		Nepal	524
		New Caledonia	540
		Vanuatu	548
		New Zealand	554
		Micronesia (Federated States of)	583
		Marshall Islands	584
		Pakistan	586
		Papua New Guinea	598
		Philippines	608
		Timor-Leste	626
		Viet Nam	704
		Tajikistan	762
		Thailand	764
		Tonga	776
		Turkmenistan	795
		Tuvalu	798
		Uzbekistan	860
		Samoa	882
WL	RoW America	Antigua and Barbuda	28
		Argentina	32
		Bahamas	44
		Barbados	52
		Bolivia (Plurinational State of)	68
		Belize	84
		Chile	152
		Colombia	170
		Costa Rica	188
		Cuba	192
		Dominica	212
		Dominican Republic	214
		Ecuador	218
		El Salvador	222
		Grenada	308
		Guatemala	320
		Guyana	328
		Haiti	332
		Honduras	340
		Jamaica	388
		Nicaragua	558
		Panama	591
		Paraguay	600
		Peru	604
		Saint Kitts and Nevis	659
		Saint Lucia	662
		Saint Vincent and the Grenadines	670
		Suriname	740
		Trinidad and Tobago	780
		Uruguay	858
		Venezuela (Bolivarian Republic of)	862
WE	RoW Europe	Albania	8
		Bosnia and Herzegovina	70
		Belarus	112
		Iceland	352
		Republic of Moldova	498
		Montenegro	499
		Serbia	688
		Ukraine	804
		North Macedonia	807
WF	RoW Africa	Algeria	12
		Angola	24
		Botswana	72
		Burundi	108
		Cameroon	120
		Cabo Verde	132
		Central African Republic	140
		Chad	148
		Comoros	174
		Congo	178
		Democratic Republic of the Congo	180
		Benin	204
		Ethiopia	231
		Djibouti	262
		Gabon	266
		Gambia	270
		Ghana	288
		Guinea	324
		Côte d’Ivoire	384
		Kenya	404
		Lesotho	426
		Liberia	430
		Libya	434
		Madagascar	450
		Malawi	454
		Mali	466
		Mauritania	478
		Mauritius	480
		Morocco	504
		Mozambique	508
		Namibia	516
		Niger	562
		Nigeria	566
		Guinea-Bissau	624
		Rwanda	646
		Sao Tome and Principe	678
		Senegal	686
		Seychelles	690
		Sierra Leone	694
		Somalia	706
		Zimbabwe	716
		South Sudan	728
		Sudan	729
		Eswatini	748
		Togo	768
		Tunisia	788
		Uganda	800
		United Republic of Tanzania	834
		Burkina Faso	854
		Zambia	894
WM	RoW Middle East	Azerbaijan	31
		Bahrain	48
		Armenia	51
		Georgia	268
		Iraq	368
		Israel	376
		Jordan	400
		Kuwait	414
		Lebanon	422
		Oman	512
		Qatar	634
		Saudi Arabia	682
		Syrian Arab Republic	760
		Yemen	887
Note: Based on the geographical region classification Standard of the United Nations, global countries and regions are classified through the M49 Standard Country or Area Codes for Statistical Use

## Sheet: Table S2 FBS EXIO industries
Activity number	Industries/products in EXIOBASE	FBS commodity	Commodity number		Food Group	Commodity number	FBS commodity		Food Groups	Industries/products in EXIOBASE
1	Cultivation of paddy rice	Rice and products	1		Cereals	1	Rice and products		Cereals	Cultivation of paddy rice, Cultivation of wheat, Cultivation of cereal grains n.e.c, Processed rice
2	Cultivation of wheat	Wheat and products	2			2	Wheat and products		Fruit & Vegetables	Cultivation of vegetables, fruit, nuts
3	Cultivation of cereal grains n.e.c	Barley and products	3			3	Barley and products		Oilseeds	Cultivation of oil seeds
3		Maize and products	4			4	Maize and products		Sugar cane/beet	Cultivation of sugar cane, sugar beet, Sugar refining
3		Rye and products	5			5	Rye and products		Other crops	Cultivation of crops n.e.c
3		Oats	6			6	Oats		Meat & meat products	Cattle farming, Pigs farming, Poultry farming, Meat animals n.e.c
3		Millet and products	7			7	Millet and products		Other animal products	Processing of meat cattle, Processing of meat pigs, Processing of meat poultry, Meat animals n.e.c
3		Sorghum and products	8			8	Sorghum and products		Fish	Fishing, operating fish hatcheries and fish farms, Manufacture of fish products
3		Cereals,Other	9			9	Cereals,Other		Vegetable Oils	Processing vegetable oils and fats
4	Cultivation of vegetables, fruit, nuts	Cassava and products	10		Fruit & Vegetables	10	Cassava and products		Food products	Processing of Food products n.e.c
4		Potatoes and products	11			11	Potatoes and products		Beverages	Manufacture of beverages
4		Sweet potatoes	12			12	Sweet potatoes
4		Yams	13			13	Yams
4		Roots,Other	14			14	Roots,Other
4		Beans	15			15	Beans
4		Peas	16			16	Peas
4		Pulses,Other and products	17			17	Pulses,Other and products
4		Nuts and products	18			18	Nuts and products
4		Soyabeans	19			19	Soyabeans
4		Groundnuts (Shelled Eq)	20			20	Groundnuts (Shelled Eq)
4		Coconuts -Incl Copra	21			21	Coconuts -Incl Copra
4		Tomatoes and products	22			22	Tomatoes and products
4		Onions	23			23	Onions
4		Vegetables,Other	24			24	Vegetables,Other
4		Oranges,Mandarines	25			25	Oranges,Mandarines
4		Lemons,Limes and products	26			26	Lemons,Limes and products
4		Grapefruit and products	27			27	Grapefruit and products
4		Citrus,Other	28			28	Citrus,Other
4		Bananas	29			29	Bananas
4		Plantains	30			30	Plantains
4		Apples and products	31			31	Apples and products
4		Pineapples and products	32			32	Pineapples and products
4		Dates	33			33	Dates
4		Grapes and products (excl wine)	34			34	Grapes and products (excl wine)
4		Fruits,Other	35			35	Fruits,Other
5	Cultivation of oil seeds	Sunflower seed	36		Oilseeds	36	Sunflower seed
5		Rape and Mustardseed	37			37	Rape and Mustardseed
5		Sesameseed	38			38	Sesameseed
5		Olives (including preserved)	39			39	Olives (including preserved)
5		Oilcrops,Other	40			40	Oilcrops,Other
5		Palm kernels	41			41	Palm kernels
5		Cottonseed	42			42	Cottonseed
6	Cultivation of sugar cane, sugar beet	Sugar cane	43		Sugar cane/beet	43	Sugar cane
6		Sugar beet	44			44	Sugar beet
6		Sugar non-centrifugal	45			45	Sugar non-centrifugal
6		Sugar (Raw Equivalent)	46			46	Sugar (Raw Equivalent)
6		Sweeteners,Other	47			47	Sweeteners,Other
8	Cultivation of crops n.e.c	Coffee and products	48		Other crops	48	Coffee and products
8		Cocoa Beans and products	49			49	Cocoa Beans and products
8		Tea (including mate)	50			50	Tea (including mate)
8		Pepper	51			51	Pepper
8		Pimento	52			52	Pimento
8		Cloves	53			53	Cloves
8		Spices,Other	54			54	Spices,Other
9	Cattle farming	Bovine Meat	55		Meat & meat products	55	Bovine Meat
10	Pigs farming	Pigmeat	56			56	Pigmeat
11	Poultry farming	Poultry Meat	57			57	Poultry Meat
12	Meat animals n.e.c	Mutton &Goat Meat	58			58	Mutton &Goat Meat
12		Meat,Other	59			59	Meat,Other
13	Animal products n.e.c	Honey	60		Other animal products	60	Honey
13		Offals, Edible	61			61	Offals, Edible
13		Fats,Animals,Raw	62			62	Fats,Animals,Raw
13		Eggs	63			63	Eggs
14	Raw milk	Milk - Excluding Butter	64		Fish	65	Freshwater Fish
19	Fishing, operating of fish hatcheries and fishfarms; service activities incidental to fishing	Freshwater Fish	65			66	Demersal Fish
19		Demersal Fish	66			67	Pelagic Fish
19		Pelagic Fish	67			68	Marine Fish,Other
19		Marine Fish,Other	68			69	Crustaceans
19		Crustaceans	69			70	Cephalopods
19		Cephalopods	70			71	Molluscs,Other
19		Molluscs,Other	71			72	Aquatic Animals,Others
19		Aquatic Animals,Others	72			73	Aquatic Plants
19		Aquatic Plants	73			74	Meat,Aquatic Mammals
19		Meat,Aquatic Mammals	74		Vegetable Oils	75	Soyabean Oil
39	Processing vegetable oils and fats	Soyabean Oil	75			76	Groundnut Oil
39		Groundnut Oil	76			77	Sunflowerseed Oi
39		Sunflowerseed Oi	77			78	Rape and Mustard Oil
39		Rape and Mustard Oil	78			79	Cottonseed Oil
39		Cottonseed Oil	79			80	Palmkernel Oi
39		Palmkernel Oi	80			81	Palm Oil
39		Palm Oil	81			82	Coconut Oil
39		Coconut Oil	82			83	Sesameseed Oil
39		Sesameseed Oil	83			84	Olive Oil
39		Olive Oil	84			85	Ricebran Oi
39		Ricebran Oi	85			86	Maize Germ Oil
39		Maize Germ Oil	86			87	Oilcrops Oil,Other
39		Oilcrops Oil,Other	87		Dairy	64	Milk - Excluding Butter
40	Processing of dairy products	Butter,Ghee	88			88	Butter,Ghee
40		Cream	89			89	Cream
43	Processing of Food products n.e.c	Infant food	90		Food products	90	Infant food
44	Manufacture of beverages	Wine	91			95	Fish, Liver Oil
44		Beer	92		Beverages	91	Wine
44		Beverages, Fermented	93			92	Beer
44		Beverages, Alcoholic	94			93	Beverages, Fermented
45	Manufacture of fish products	Fish, Liver Oil	95			94	Beverages, Alcoholic
基于FAO的标准化食物分类体系对96种食物进行分组（CPC VER.2.1 EXPANDED FOR AGRICULTURE）

## Sheet: Table S3 FSC EXIO industries
Activity number	Activity name	food_system	stage	fbs
1	Cultivation of paddy rice	yes	agriculture	seed
2	Cultivation of wheat	yes	agriculture	seed
3	Cultivation of cereal grains nec	yes	agriculture	seed
4	Cultivation of vegetables, fruit, nuts	yes	agriculture	seed
5	Cultivation of oil seeds	yes	agriculture	seed
6	Cultivation of sugar cane, sugar beet	yes	agriculture	seed
7	Cultivation of plant-based fibers	yes	agriculture	seed
8	Cultivation of crops nec	yes	agriculture	seed
9	Cattle farming	yes	agriculture	feed
10	Pigs farming	yes	agriculture	feed
11	Poultry farming	yes	agriculture	feed
12	Meat animals nec	yes	agriculture	feed
13	Animal products nec	yes	agriculture	feed
14	Raw milk	yes	agriculture	feed
15	Wool, silk-worm cocoons	no		Other uses (non-food)
16	Manure treatment (conventional), storage and land application	no		Other uses (non-food)
17	Manure treatment (biogas), storage and land application	no		Other uses (non-food)
18	Forestry, logging and related service activities	no		Other uses (non-food)
19	Fishing, operating of fish hatcheries and fish farms; service activities incidental to fishing (05)	yes	agriculture	feed
20	Mining of coal and lignite; extraction of peat	no		Other uses (non-food)
21	Extraction of crude petroleum and services related to crude oil extraction, excluding surveying	no		Other uses (non-food)
22	Extraction of natural gas and services related to natural gas extraction, excluding surveying	no		Other uses (non-food)
23	Extraction, liquefaction, and regasification of other petroleum and gaseous materials	no		Other uses (non-food)
24	Mining of uranium and thorium ores	no		Other uses (non-food)
25	Mining of iron ores	no		Other uses (non-food)
26	Mining of copper ores and concentrates	no		Other uses (non-food)
27	Mining of nickel ores and concentrates	no		Other uses (non-food)
28	Mining of aluminium ores and concentrates	no		Other uses (non-food)
29	Mining of precious metal ores and concentrates	no		Other uses (non-food)
30	Mining of lead, zinc and tin ores and concentrates	no		Other uses (non-food)
31	Mining of other non-ferrous metal ores and concentrates	no		Other uses (non-food)
32	Quarrying of stone	no		Other uses (non-food)
33	Quarrying of sand and clay	no		Other uses (non-food)
34	Mining of chemical and fertilizer minerals, production of salt, other mining and quarrying n.e.c.	no		Other uses (non-food)
35	Processing of meat cattle	yes	processing	processing
36	Processing of meat pigs	yes	processing	processing
37	Processing of meat poultry	yes	processing	processing
38	Production of meat products nec	yes	processing	processing
39	Processing vegetable oils and fats	yes	processing	processing
40	Processing of dairy products	yes	processing	processing
41	Processed rice	yes	processing	processing
42	Sugar refining	yes	processing	processing
43	Processing of Food products nec	yes	processing	processing
44	Manufacture of beverages	yes	processing	processing
45	Manufacture of fish products	yes	processing	processing
46	Manufacture of tobacco products	no		Other uses (non-food)
47	Manufacture of textiles	no		Other uses (non-food)
48	Manufacture of wearing apparel; dressing and dyeing of fur	no		Other uses (non-food)
49	Tanning and dressing of leather; manufacture of luggage, handbags, saddlery, harness and footwear (19)	no		Other uses (non-food)
50	Manufacture of wood and of products of wood and cork, except furniture; manufacture of articles of straw and plaiting materials (20)	no		Other uses (non-food)
51	Re-processing of secondary wood material into new wood material	no		Other uses (non-food)
52	Pulp	no		Other uses (non-food)
53	Re-processing of secondary paper into new pulp	no		Other uses (non-food)
54	Paper	no		Other uses (non-food)
55	Publishing, printing and reproduction of recorded media	no		Other uses (non-food)
56	Manufacture of coke oven products	no		Other uses (non-food)
57	Petroleum Refinery	no		Other uses (non-food)
58	Processing of nuclear fuel	no		Other uses (non-food)
59	Plastics, basic	no		Other uses (non-food)
60	Re-processing of secondary plastic into new plastic	no		Other uses (non-food)
61	N-fertiliser	no		Other uses (non-food)
62	P- and other fertiliser	no		Other uses (non-food)
63	Chemicals nec	no		Other uses (non-food)
64	Manufacture of rubber and plastic products	no		Other uses (non-food)
65	Manufacture of glass and glass products	no		Other uses (non-food)
66	Re-processing of secondary glass into new glass	no		Other uses (non-food)
67	Manufacture of ceramic goods	no		Other uses (non-food)
68	Manufacture of bricks, tiles and construction products, in baked clay	no		Other uses (non-food)
69	Manufacture of cement, lime and plaster	no		Other uses (non-food)
70	Re-processing of ash into clinker	no		Other uses (non-food)
71	Manufacture of other non-metallic mineral products n.e.c.	no		Other uses (non-food)
72	Manufacture of basic iron and steel and of ferro-alloys and first products thereof	no		Other uses (non-food)
73	Re-processing of secondary steel into new steel	no		Other uses (non-food)
74	Precious metals production	no		Other uses (non-food)
75	Re-processing of secondary preciuos metals into new preciuos metals	no		Other uses (non-food)
76	Aluminium production	no		Other uses (non-food)
77	Re-processing of secondary aluminium into new aluminium	no		Other uses (non-food)
78	Lead, zinc and tin production	no		Other uses (non-food)
79	Re-processing of secondary lead into new lead, zinc and tin	no		Other uses (non-food)
80	Copper production	no		Other uses (non-food)
81	Re-processing of secondary copper into new copper	no		Other uses (non-food)
82	Other non-ferrous metal production	no		Other uses (non-food)
83	Re-processing of secondary other non-ferrous metals into new other non-ferrous metals	no		Other uses (non-food)
84	Casting of metals	no		Other uses (non-food)
85	Manufacture of fabricated metal products, except machinery and equipment	no		Other uses (non-food)
86	Manufacture of machinery and equipment n.e.c.	no		Other uses (non-food)
87	Manufacture of office machinery and computers	no		Other uses (non-food)
88	Manufacture of electrical machinery and apparatus n.e.c.	no		Other uses (non-food)
89	Manufacture of radio, television and communication equipment and apparatus	no		Other uses (non-food)
90	Manufacture of medical, precision and optical instruments, watches and clocks	no		Other uses (non-food)
91	Manufacture of motor vehicles, trailers and semi-trailers	no		Other uses (non-food)
92	Manufacture of other transport equipment	no		Other uses (non-food)
93	Manufacture of furniture; manufacturing n.e.c.	no		Other uses (non-food)
94	Recycling of waste and scrap	no		Other uses (non-food)
95	Recycling of bottles by direct reuse	no		Other uses (non-food)
96	Production of electricity by coal	no		Other uses (non-food)
97	Production of electricity by gas	no		Other uses (non-food)
98	Production of electricity by nuclear	no		Other uses (non-food)
99	Production of electricity by hydro	no		Other uses (non-food)
100	Production of electricity by wind	no		Other uses (non-food)
101	Production of electricity by petroleum and other oil derivatives	no		Other uses (non-food)
102	Production of electricity by biomass and waste	no		Other uses (non-food)
103	Production of electricity by solar photovoltaic	no		Other uses (non-food)
104	Production of electricity by solar thermal	no		Other uses (non-food)
105	Production of electricity by tide, wave, ocean	no		Other uses (non-food)
106	Production of electricity by Geothermal	no		Other uses (non-food)
107	Production of electricity nec	no		Other uses (non-food)
108	Transmission of electricity	no		Other uses (non-food)
109	Distribution and trade of electricity	no		Other uses (non-food)
110	Manufacture of gas; distribution of gaseous fuels through mains	no		Other uses (non-food)
111	Steam and hot water supply	no		Other uses (non-food)
112	Collection, purification and distribution of water (41)	no		Other uses (non-food)
113	Construction (45)	no		Other uses (non-food)
114	Re-processing of secondary construction material into aggregates	no		Other uses (non-food)
115	Sale, maintenance, repair of motor vehicles, motor vehicles parts, motorcycles, motor cycles parts and accessoiries	no		Other uses (non-food)
116	Retail sale of automotive fuel	no		Other uses (non-food)
117	Wholesale trade and commission trade, except of motor vehicles and motorcycles (51)	no
118	Retail trade, except of motor vehicles and motorcycles; repair of personal and household goods (52)	yes
119	Hotels and restaurants	yes	foodservice	food
120	Transport via railways	yes	foodservice	food
121	Other land transport	yes	foodservice	food
122	Transport via pipelines	yes	foodservice	food
123	Sea and coastal water transport	yes	foodservice	food
124	Inland water transport	yes	foodservice	food
125	Air transport (62)	yes	foodservice	food
126	Supporting and auxiliary transport activities; activities of travel agencies	yes	foodservice	food
127	Post and telecommunications	yes
128	Financial intermediation, except insurance and pension funding	no
129	Insurance and pension funding, except compulsory social security	no
130	Activities auxiliary to financial intermediation	no
131	Real estate activities	no
132	Renting of machinery and equipment without operator and of personal and household goods (71)	no
133	Computer and related activities	no
134	Research and development	no
135	Other business activities	yes	institutional	food
136	Public administration and defence; compulsory social security	yes	institutional	food
137	Education	yes	institutional	food
138	Health and social work	yes	institutional	food
139	Incineration of waste: Food	no
140	Incineration of waste: Paper	no
141	Incineration of waste: Plastic	no
142	Incineration of waste: Metals and Inert materials	no
143	Incineration of waste: Textiles	no
144	Incineration of waste: Wood	no
145	Incineration of waste: Oil/Hazardous waste	no
146	Biogasification of food waste, incl. land application	no
147	Biogasification of paper, incl. land application	no
148	Biogasification of sewage slugde, incl. land application	no
149	Composting of food waste, incl. land application	no
150	Composting of paper and wood, incl. land application	no
151	Waste water treatment, food	no
152	Waste water treatment, other	no
153	Landfill of waste: Food	no
154	Landfill of waste: Paper	no
155	Landfill of waste: Plastic	no
156	Landfill of waste: Inert/metal/hazardous	no
157	Landfill of waste: Textiles	no
158	Landfill of waste: Wood	no
159	Activities of membership organisation n.e.c.	no
160	Recreational, cultural and sporting activities	yes	institutional	food
161	Other service activities	yes	foodservice	food
162	Private households with employed persons	yes	foodservice	food
163	Extra-territorial organizations and bodies	yes	institutional	food

## Sheet: Table S4 FBS FAO food countries
Countries in EXIOBASE		FBS country	Region Name	Sub-region Name	M49 Code	FAO country (Reporter Countries/Partner Countries)	M49 Code				FBS Item	FBS commodity	Description	FAO Item	FAO commodity
AT	Austria	Austria	Europe	Western Europe	40	Austria	40				2807	Rice and products	Default composition: 27 Rice, paddy, 28 Rice, husked, 29 Rice, milled/husked, 31 Rice, milled, 32 Rice, broken, 33 Gluten, rice, 34 Starch, rice, 35 Bran, rice, 38 Flour, rice	27	Rice
BE	Belgium	Belgium	Europe	Western Europe	56	Belgium	56							28	Husked rice
BG	Bulgaria	Bulgaria	Europe	Eastern Europe	100	Bulgaria	100							29	Rice, milled (husked)
CY	Cyprus	Cyprus	Asia	Western Asia	196	Cyprus	196							31	Rice, milled
CZ	Czech Republic	Czechia	Europe	Eastern Europe	203	Czechia	203							32	Rice, broken
DE	Germany	Germany	Europe	Western Europe	276	Germany	276							35	Bran of rice
DK	Denmark	Denmark	Europe	Northern Europe	208	Denmark	208							38	Flour of rice
EE	Estonia	Estonia	Europe	Northern Europe	233	Estonia	233				2511	Wheat and products	Default composition: 15 Wheat, 16 Flour, wheat, 17 Bran, wheat, 18 Macaroni, 19 Germ, wheat, 20 Bread, 21 Bulgur, 22 Pastry, 23 Starch, wheat, 24 Gluten, wheat, 41 Cereals, breakfast, 110 Wafers, 114 Mixes and doughs, 115 Food preparations, flour, malt extract	15	Wheat
ES	Spain	Spain	Europe	Southern Europe	724	Spain	724							16	Wheat and meslin flour
FI	Finland	Finland	Europe	Northern Europe	246	Finland	246							17	Bran of wheat
FR	France	France	Europe	Western Europe	250	France	250							18	Uncooked pasta, not stuffed or otherwise prepared
GR	Greece	Greece	Europe	Southern Europe	300	Greece	300							19	Germ of wheat
HR	Croatia	Croatia	Europe	Southern Europe	191	Croatia	191							20	Bread
HU	Hungary	Hungary	Europe	Eastern Europe	348	Hungary	348							21	Bulgur
IE	Ireland	Ireland	Europe	Northern Europe	372	Ireland	372							22	Pastry
IT	Italy	Italy	Europe	Southern Europe	380	Italy	380							41	Breakfast cereals
LT	Lithuania	Lithuania	Europe	Northern Europe	440	Lithuania	440							110	Communion wafers, empty cachets of a kind suitable for pharmaceutical use, sealing wafers, rice paper and similar products.
LU	Luxembourg	Luxembourg	Europe	Western Europe	442	Luxembourg	442							114	Mixes and doughs for the preparation of bakers' wares
LV	Latvia	Latvia	Europe	Northern Europe	428	Latvia	428							115	Food preparations of flour, meal or malt extract
MT	Malta	Malta	Europe	Southern Europe	470	Malta	470				2513	Barley and products	Default composition: 44 Barley, 45 Barley, pot, 46 Barley, pearled, 47 Bran, barley, 48 Flour, barley and grits, 49 Malt, 50 Malt extract	44	Barley
NL	Netherlands	Netherlands (Kingdom of the)	Europe	Western Europe	528	Netherlands (Kingdom of the)	528							45	Pot barley
PL	Poland	Poland	Europe	Eastern Europe	616	Poland	616							46	Barley, pearled
PT	Portugal	Portugal	Europe	Southern Europe	620	Portugal	620							47	Bran of barley
RO	Romania	Romania	Europe	Eastern Europe	642	Romania	642							48	Barley flour and grits
SE	Sweden	Sweden	Europe	Northern Europe	752	Sweden	752							49	Malt, whether or not roasted
SI	Slovenia	Slovenia	Europe	Southern Europe	705	Slovenia	705							50	Malt extract
SK	Slovakia	Slovakia	Europe	Eastern Europe	703	Slovakia	703				2514	Maize and products	Default composition: 56 Maize, 57 Germ, maize, 58 Flour, maize, 59 Bran, maize, 63 Gluten, maize, 64 Starch, maize, 846 Feed and meal, gluten	56	Maize (corn)
GB	United Kingdom	United Kingdom of Great Britain and Northern Ireland	Europe	Northern Europe	826	United Kingdom of Great Britain and Northern Ireland	826							57	Germ of maize
US	United States	United States of America	Americas	Northern America	840	United States of America	840							58	Flour of maize
JP	Japan	Japan	Asia	Eastern Asia	392	Japan	392							59	Bran of maize
CN	China	China	Asia	Eastern Asia	156	China, mainland	156							846	Gluten feed and meal
CA	Canada	Canada	Americas	Northern America	124	Canada	124				2515	Rye and products	Default composition: 71 Rye, 72 Flour, rye, 73 Bran, rye	71	Rye
KR	South Korea	Republic of Korea	Asia	Eastern Asia	410	Republic of Korea	410							72	Flour of rye
BR	Brazil	Brazil	Americas	Latin America and the Caribbean	76	Brazil	76							73	Bran of rye
IN	India	India	Asia	Southern Asia	356	India	356				2516	Oats	Default composition: 75 Oats, 76 Oats rolled, 77 Bran, oats	75	Oats
MX	Mexico	Mexico	Americas	Latin America and the Caribbean	484	Mexico	484							76	Oats, rolled
RU	Russia	Russian Federation	Europe	Eastern Europe	643	Russian Federation	643							77	Bran of oats
AU	Australia	Australia	Oceania	Australia and New Zealand	36	Australia	36				2517	Millet and products	Default composition: 79 Millet, 80 Flour, millet, 81 Bran, millet	79	Millet
CH	Switzerland	Switzerland	Europe	Western Europe	756	Switzerland	756							80	Flour of millet
TR	Turkey	Türkiye	Asia	Western Asia	792	Türkiye	792							81	Bran of millet
TW	Taiwan	China, Taiwan Province of	Asia	Eastern Asia	156	China, mainland	156				2518	Sorghum and products	Default composition: 83 Sorghum, 84 Flour, sorghum, 85 Bran, sorghum	83	Sorghum
NO	Norway	Norway	Europe	Northern Europe	578	Norway	578							84	Flour of sorghum
ID	Indonesia	Indonesia	Asia	South-eastern Asia	360	Indonesia	360							85	Bran of sorghum
ZA	South Africa	South Africa	Africa	Sub-Saharan Africa	710	South Africa	710				2520	Cereals, other	Default composition: 68 Popcorn, 89 Buckwheat, 90 Flour, buckwheat, 91 Bran, buckwheat, 92 Quinoa, 94 Fonio, 95 Flour, fonio, 96 Bran, fonio, 97 Triticale, 98 Flour, triticale, 99 Bran, triticale, 101 Canary seed, 103 Grain, mixed, 104 Flour, mixed grain, 105 Bran, mixed grains, 108 Cereals, nes, 111 Flour, cereals, 112 Bran, cereals nes, 113 Cereal preparations, nes	89	Buckwheat
WA	RoW Asia and Pacific	Afghanistan	Asia	Southern Asia	4	Afghanistan	4							90	Flour of buckwheat
		Bangladesh	Asia	Southern Asia	50	Bangladesh	50							91	Bran of buckwheat
		Bhutan	Asia	Southern Asia	64	Bhutan	64							92	Quinoa
		Solomon Islands	Oceania	Melanesia	90	Solomon Islands	90							94	Fonio
		Myanmar	Asia	South-eastern Asia	104	Myanmar	104							95	Flour of fonio
		Cambodia	Asia	South-eastern Asia	116	Cambodia	116							96	Bran of fonio
		Sri Lanka	Asia	Southern Asia	144	Sri Lanka	144							97	Triticale
		Fiji	Oceania	Melanesia	242	Fiji	242							101	Canary seed
		French Polynesia	Oceania	Polynesia	258	French Polynesia	258							103	Mixed grain
		Kiribati	Oceania	Micronesia	296	Kiribati	296							104	Flour of mixed grain
		Kazakhstan	Asia	Central Asia	398	Kazakhstan	398							105	Bran of mixed grain
		Kyrgyzstan	Asia	Central Asia	417	Kyrgyzstan	417							108	Cereals n.e.c.
		Lao People's Democratic Republic	Asia	South-eastern Asia	418	Lao People's Democratic Republic	418							111	Flour of cereals n.e.c.
		Malaysia	Asia	South-eastern Asia	458	Malaysia	458							112	Bran of cereals n.e.c.
		Maldives	Asia	Southern Asia	462	Maldives	462							113	Cereal preparations
		Mongolia	Asia	Eastern Asia	496	Mongolia	496				2532	Cassava and products	Default composition: 125 Cassava, 126 Flour, cassava, 127 Tapioca, cassava, 128 Cassava dried, 129 Starch, cassava	125	Cassava, fresh
		Nauru	Oceania	Micronesia	520	Nauru	520							126	Flour of cassava
		Nepal	Asia	Southern Asia	524	Nepal	524							127	Tapioca of cassava
		New Caledonia	Oceania	Melanesia	540	New Caledonia	540							128	Cassava, dry
		Vanuatu	Oceania	Melanesia	548	Vanuatu	548							129	Starch of cassava
		New Zealand	Oceania	Australia and New Zealand	554	New Zealand	554				2531	Potatoes and products	Default composition: 116 Potatoes, 117 Flour, potatoes, 118 Potatoes, frozen, 119 Starch, potatoes, 121 Tapioca, potatoes	116	Potatoes
		Micronesia (Federated States of)	Oceania	Micronesia	583	Micronesia (Federated States of)	583							117	Flour, meal, powder, flakes, granules and pellets of potatoes
		Marshall Islands	Oceania	Micronesia	584	Marshall Islands	584							118	Potatoes, frozen
		Pakistan	Asia	Southern Asia	586	Pakistan	586							120	Potato offals
		Papua New Guinea	Oceania	Melanesia	598	Papua New Guinea	598							121	Tapioca of potatoes
		Philippines	Asia	South-eastern Asia	608	Philippines	608				2533	Sweet potatoes	Default composition: 122 Sweet potatoes	122	Sweet potatoes
		Timor-Leste	Asia	South-eastern Asia	626	Timor-Leste	626				2535	Yams	Default composition: 137 Yams	137	Yams
		Viet Nam	Asia	South-eastern Asia	704	Viet Nam	704				2534	Roots, Other	Default composition: 135 Yautia (cocoyam), 136 Taro (cocoyam), 149 Roots and tubers, nes, 150 Flour, roots and tubers nes, 151 Roots and tubers dried	135	Yautia
		Tajikistan	Asia	Central Asia	762	Tajikistan	762							136	Taro
		Thailand	Asia	South-eastern Asia	764	Thailand	764							149	Edible roots and tubers with high starch or inulin content, n.e.c., fresh
		Tonga	Oceania	Polynesia	776	Tonga	776							150	Flour of roots and tubers n.e.c.
		Turkmenistan	Asia	Central Asia	795	Turkmenistan	795							151	Edible roots and tubers with high starch or inulin content, n.e.c., dry
		Tuvalu	Oceania	Polynesia	798	Tuvalu	798				2546	Beans	Default composition: 176 Beans, dry	176	Beans, dry
		Uzbekistan	Asia	Central Asia	860	Uzbekistan	860				2547	Peas	Default composition: 187 Peas, dry	187	Peas, dry
		Samoa	Oceania	Polynesia	882	Samoa	882				2549	Pulses, Other and products	Default composition: 181 Broad beans, horse beans, dry, 191 Chick peas, 195 Cow peas, dry, 197 Pigeon peas, 201 Lentils, 203 Bambara beans, 205 Vetches, 210 Lupins, 211 Pulses, nes, 212 Flour, pulses, 213 Bran, pulses	181	Broad beans and horse beans, dry
WL	RoW America	Antigua and Barbuda	Americas	Latin America and the Caribbean	28	Antigua and Barbuda	28							191	Chick peas, dry
		Argentina	Americas	Latin America and the Caribbean	32	Argentina	32							195	Cow peas, dry
		Bahamas	Americas	Latin America and the Caribbean	44	Bahamas	44							197	Pigeon peas, dry
		Barbados	Americas	Latin America and the Caribbean	52	Barbados	52							201	Lentils, dry
		Bolivia (Plurinational State of)	Americas	Latin America and the Caribbean	68	Bolivia (Plurinational State of)	68							203	Bambara beans, dry
		Belize	Americas	Latin America and the Caribbean	84	Belize	84							205	Vetches
		Chile	Americas	Latin America and the Caribbean	152	Chile	152							210	Lupins
		Colombia	Americas	Latin America and the Caribbean	170	Colombia	170							211	Other pulses n.e.c.
		Costa Rica	Americas	Latin America and the Caribbean	188	Costa Rica	188							212	Flour of pulses
		Cuba	Americas	Latin America and the Caribbean	192	Cuba	192							213	Bran of pulses
		Dominica	Americas	Latin America and the Caribbean	212	Dominica	212				2551	Nuts and products	Default composition: 216 Brazil nuts, with shell, 217 Cashew nuts, with shell, 220 Chestnut, 221 Almonds, with shell, 222 Walnuts, with shell, 223 Pistachios, 224 Kola nuts, 225 Hazelnuts, with shell, 226 Areca nuts, 229 Brazil nuts, shelled, 230 Cashew nuts, shelled, 231 Almonds shelled, 232 Walnuts, shelled, 233 Hazelnuts, shelled, 234 Nuts, nes, 235 Nuts, prepared (exc. groundnuts)	216	Brazil nuts, in shell
		Dominican Republic	Americas	Latin America and the Caribbean	214	Dominican Republic	214							217	Cashew nuts, in shell
		Ecuador	Americas	Latin America and the Caribbean	218	Ecuador	218							220	Chestnuts, in shell
		El Salvador	Americas	Latin America and the Caribbean	222	El Salvador	222							221	Almonds, in shell
		Grenada	Americas	Latin America and the Caribbean	308	Grenada	308							222	Walnuts, in shell
		Guatemala	Americas	Latin America and the Caribbean	320	Guatemala	320							223	Pistachios, in shell
		Guyana	Americas	Latin America and the Caribbean	328	Guyana	328							224	Kola nuts
		Haiti	Americas	Latin America and the Caribbean	332	Haiti	332							225	Hazelnuts, in shell
		Honduras	Americas	Latin America and the Caribbean	340	Honduras	340							226	Areca nuts
		Jamaica	Americas	Latin America and the Caribbean	388	Jamaica	388							229	Brazil nuts, shelled
		Nicaragua	Americas	Latin America and the Caribbean	558	Nicaragua	558							230	Cashew nuts, shelled
		Panama	Americas	Latin America and the Caribbean	591	Panama	591							231	Almonds, shelled
		Paraguay	Americas	Latin America and the Caribbean	600	Paraguay	600							232	Walnuts, shelled
		Peru	Americas	Latin America and the Caribbean	604	Peru	604							233	Hazelnuts, shelled
		Saint Kitts and Nevis	Americas	Latin America and the Caribbean	659	Saint Kitts and Nevis	659							234	Other nuts (excluding wild edible nuts and groundnuts), in shell, n.e.c.
		Saint Lucia	Americas	Latin America and the Caribbean	662	Saint Lucia	662							235	Prepared nuts
		Saint Vincent and the Grenadines	Americas	Latin America and the Caribbean	670	Saint Vincent and the Grenadines	670				2555	Soyabeans	Default composition: 236 Soybeans, 239 Soya sauce, 240 Soya paste, 241 Soya curd	236	Soya beans
		Suriname	Americas	Latin America and the Caribbean	740	Suriname	740							239	Soya sauce
		Trinidad and Tobago	Americas	Latin America and the Caribbean	780	Trinidad and Tobago	780							240	Soya paste
		Uruguay	Americas	Latin America and the Caribbean	858	Uruguay	858							241	Soya curd
		Venezuela (Bolivarian Republic of)	Americas	Latin America and the Caribbean	862	Venezuela (Bolivarian Republic of)	862				2552	Groundnuts	Default composition: 242 Groundnuts, with shell, 243 Groundnuts, shelled, 246 Groundnuts, prepared, 247 Peanut butter	242	Groundnuts, excluding shelled
WE	RoW Europe	Albania	Europe	Southern Europe	8	Albania	8							243	Groundnuts, shelled
		Bosnia and Herzegovina	Europe	Southern Europe	70	Bosnia and Herzegovina	70							246	Prepared groundnuts
		Belarus	Europe	Eastern Europe	112	Belarus	112							247	Peanut butter
		Iceland	Europe	Northern Europe	352	Iceland	352				2560	Coconuts - Incl Copra	Default composition: 249 Coconuts, 250 Coconuts, desiccated, 251 Copra	249	Coconuts, in shell
		Republic of Moldova	Europe	Eastern Europe	498	Republic of Moldova	498							250	Coconuts, desiccated
		Montenegro	Europe	Southern Europe	499	Montenegro	499							251	Copra
		Serbia	Europe	Southern Europe	688	Serbia	688				2601	Tomatoes and products	Default composition: 388 Tomatoes, 389 Juice, tomato, concentrated, 390 Juice, tomato, 391 Tomatoes, paste, 392 Tomatoes, peeled	388	Tomatoes
		Ukraine	Europe	Eastern Europe	804	Ukraine	804							390	Tomato juice
		North Macedonia	Europe	Southern Europe	807	North Macedonia	807							391	Paste of tomatoes
WF	RoW Africa	Algeria	Africa	Northern Africa	12	Algeria	12							392	Tomatoes, peeled (o/t vinegar)
		Angola	Africa	Sub-Saharan Africa	24	Angola	24				2602	Onions	Default composition: 403 Onions, dry	403	Onions and shallots, dry (excluding dehydrated)
		Botswana	Africa	Sub-Saharan Africa	72	Botswana	72				2605	Vegetables, other	Default composition: 358 Cabbages and other brassicas, 366 Artichokes, 367 Asparagus, 372 Lettuce and chicory, 373 Spinach, 378 Cassava leaves, 393 Cauliflowers and broccoli, 394 Pumpkins, squash and gourds, 397 Cucumbers and gherkins, 399 Eggplants (aubergines), 401 Chillies and peppers, green, 402 Onions, shallots, green, 406 Garlic, 407 Leeks, other alliaceous vegetables, 414 Beans, green, 417…	358	Cabbages
		Burundi	Africa	Sub-Saharan Africa	108	Burundi	108							366	Artichokes
		Cameroon	Africa	Sub-Saharan Africa	120	Cameroon	120							367	Asparagus
		Cabo Verde	Africa	Sub-Saharan Africa	132	Cabo Verde	132							372	Lettuce and chicory
		Central African Republic	Africa	Sub-Saharan Africa	140	Central African Republic	140							373	Spinach
		Chad	Africa	Sub-Saharan Africa	148	Chad	148							393	Cauliflowers and broccoli
		Comoros	Africa	Sub-Saharan Africa	174	Comoros	174							394	Pumpkins, squash and gourds
		Congo	Africa	Sub-Saharan Africa	178	Congo	178							397	Cucumbers and gherkins
		Democratic Republic of the Congo	Africa	Sub-Saharan Africa	180	Democratic Republic of the Congo	180							399	Eggplants (aubergines)
		Benin	Africa	Sub-Saharan Africa	204	Benin	204							401	Chillies and peppers, green (Capsicum spp. and Pimenta spp.)
		Ethiopia	Africa	Sub-Saharan Africa	231	Ethiopia	231							402	Onions and shallots, green
		Djibouti	Africa	Sub-Saharan Africa	262	Djibouti	262							406	Green garlic
		Gabon	Africa	Sub-Saharan Africa	266	Gabon	266							407	Leeks and other alliaceous vegetables
		Gambia	Africa	Sub-Saharan Africa	270	Gambia	270							414	Other beans, green
		Ghana	Africa	Sub-Saharan Africa	288	Ghana	288							417	Peas, green
		Guinea	Africa	Sub-Saharan Africa	324	Guinea	324							420	Broad beans and horse beans, green
		Côte d’Ivoire	Africa	Sub-Saharan Africa	384	Côte d'Ivoire	384							423	String beans
		Kenya	Africa	Sub-Saharan Africa	404	Kenya	404							426	Carrots and turnips
		Lesotho	Africa	Sub-Saharan Africa	426	Lesotho	426							430	Okra
		Liberia	Africa	Sub-Saharan Africa	430	Liberia	430							446	Green corn (maize)
		Libya	Africa	Northern Africa	434	Libya	434							447	Sweet corn, frozen
		Madagascar	Africa	Sub-Saharan Africa	450	Madagascar	450							448	Sweet corn, prepared or preserved
		Malawi	Africa	Sub-Saharan Africa	454	Malawi	454							449	Mushrooms and truffles
		Mali	Africa	Sub-Saharan Africa	466	Mali	466							450	Dried mushrooms
		Mauritania	Africa	Sub-Saharan Africa	478	Mauritania	478							451	Canned mushrooms
		Mauritius	Africa	Sub-Saharan Africa	480	Mauritius	480							459	Chicory roots
		Morocco	Africa	Northern Africa	504	Morocco	504							461	Locust beans (carobs)
		Mozambique	Africa	Sub-Saharan Africa	508	Mozambique	508							463	Other vegetables, fresh n.e.c.
		Namibia	Africa	Sub-Saharan Africa	516	Namibia	516							465	Other vegetables and pulses, preserved other than by vinegar, acetic acid or sugar, n.e.c.
		Niger	Africa	Sub-Saharan Africa	562	Niger	562							466	Other vegetable juices
		Nigeria	Africa	Sub-Saharan Africa	566	Nigeria	566							469	Vegetables, dehydrated
		Guinea-Bissau	Africa	Sub-Saharan Africa	624	Guinea-Bissau	624							471	Vegetables, pulses and potatoes, preserved by vinegar or acetic acid
		Rwanda	Africa	Sub-Saharan Africa	646	Rwanda	646							472	Vegetables preserved nes (o/t vinegar)
		Sao Tome and Principe	Africa	Sub-Saharan Africa	678	Sao Tome and Principe	678							473	Vegetables frozen
		Senegal	Africa	Sub-Saharan Africa	686	Senegal	686							474	Other vegetables provisionally preserved
		Seychelles	Africa	Sub-Saharan Africa	690	Seychelles	690							475	Vegetables preserved (frozen)
		Sierra Leone	Africa	Sub-Saharan Africa	694	Sierra Leone	694							476	Homogenized vegetable preparations
		Somalia	Africa	Sub-Saharan Africa	706	Somalia	706							567	Watermelons
		Zimbabwe	Africa	Sub-Saharan Africa	716	Zimbabwe	716							568	Cantaloupes and other melons
		South Sudan	Africa	Sub-Saharan Africa	728	South Sudan	728							658	Coffee substitutes
		Sudan	Africa	Northern Africa	729	Sudan	729				2611	Oranges, Mandarines	Default composition: 490 Oranges, 491 Juice, orange, single strength, 492 Juice, orange, concentrated, 495 Tangerines, mandarins, clementines, satsumas, 496 Juice, tangerine	490	Oranges
		Eswatini	Africa	Sub-Saharan Africa	748	Eswatini	748							491	Orange juice
		Togo	Africa	Sub-Saharan Africa	768	Togo	768							492	Orange juice, concentrated
		Tunisia	Africa	Northern Africa	788	Tunisia	788							495	Tangerines, mandarins, clementines
		Uganda	Africa	Sub-Saharan Africa	800	Uganda	800							496	Juice of tangerine
		United Republic of Tanzania	Africa	Sub-Saharan Africa	834	United Republic of Tanzania	834				2612	Lemons, Limes and products	Default composition: 497 Lemons and limes, 498 Juice, lemon, single strength, 499 Juice, lemon, concentrated	497	Lemons and limes
		Burkina Faso	Africa	Sub-Saharan Africa	854	Burkina Faso	854							498	Juice of lemon
		Zambia	Africa	Sub-Saharan Africa	894	Zambia	894							499	Lemon juice, concentrated
WM	RoW Middle East	Azerbaijan	Asia	Western Asia	31	Azerbaijan	31				2613	Grapefruit and products	Default composition: 507 Grapefruit (inc. pomelos), 509 Juice, grapefruit, 510 Juice, grapefruit, concentrated	507	Pomelos and grapefruits
		Bahrain	Asia	Western Asia	48	Bahrain	48							509	Grapefruit juice
		Armenia	Asia	Western Asia	51	Armenia	51							510	Grapefruit juice, concentrated
		Georgia	Asia	Western Asia	268	Georgia	268				2614	Citrus, Other	Default composition: 512 Fruit, citrus nes, 513 Juice, citrus, single strength, 514 Juice, citrus, concentrated	512	Other citrus fruit, n.e.c.
		Iraq	Asia	Western Asia	368	Iraq	368							513	Juice of citrus fruit n.e.c.
		Israel	Asia	Western Asia	376	Israel	376							514	Citrus juice, concentrated n.e.c.
		Jordan	Asia	Western Asia	400	Jordan	400				2615	Bananas	Default composition: 486 Bananas	486	Bananas
		Kuwait	Asia	Western Asia	414	Kuwait	414				2616	Plantains	Default composition: 489 Plantains	489	Plantains and cooking bananas
		Lebanon	Asia	Western Asia	422	Lebanon	422				2617	Apples and products	Default composition: 515 Apples, 518 Juice, apple, single strength, 519 Juice, apple, concentrated	515	Apples
		Oman	Asia	Western Asia	512	Oman	512							518	Apple juice
		Qatar	Asia	Western Asia	634	Qatar	634							519	Apple juice, concentrated
		Saudi Arabia	Asia	Western Asia	682	Saudi Arabia	682				2618	Pineapples and products	Default composition: 574 Pineapples, 575 Pineapples canned, 576 Juice, pineapple, 580 Juice, pineapple, concentrated	574	Pineapples
		Syrian Arab Republic	Asia	Western Asia	760	Syrian Arab Republic	760							575	Pineapples, otherwise prepared or preserved
		Yemen	Asia	Western Asia	887	Yemen	887							576	Pineapple juice
														580	Juice of pineapples, concentrated
Note: Based on the geographical region classification Standard of the United Nations, global countries and regions are classified through the M49 Standard Country or Area Codes for Statistical Use											2619	Dates	Default composition: 577 Dates	577	Dates
											2620	Grapes and products (excl wine)	Default composition: 560 Grapes, 561 Raisins, 562 Juice, grape, 563 Grapes, must	560	Grapes
														561	Raisins
														562	Grape juice
														563	Must of grape
											2625	Fruits, other	Default composition: 521 Pears, 523 Quinces, 526 Apricots, 527 Apricots, dry, 530 Cherries, sour, 531 Cherries, 534 Peaches and nectarines, 536 Plums and sloes, 537 Plums dried (prunes), 538 Juice, plum, single strength, 539 Juice, plum, concentrated, 541 Fruit, stone nes, 542 Fruit, pome nes, 544 Strawberries, 547 Raspberries, 549 Gooseberries, 550 Currants, 552 Blueberries, 554 Cranberries, 558…	521	Pears
														523	Quinces
														526	Apricots
														527	Apricots, dried
														530	Sour cherries
														531	Cherries
														534	Peaches and nectarines
														536	Plums and sloes
														537	Plums, dried
														538	Juice of plum
														539	Juice of plum, concentrated
														541	Other stone fruits
														544	Strawberries
														547	Raspberries
														549	Gooseberries
														550	Currants
														552	Blueberries
														554	Cranberries
														558	Other berries and fruits of the genus vaccinium n.e.c.
														569	Figs
														570	Figs, dried
														571	Mangoes, guavas and mangosteens
														572	Avocados
														583	Juice of mango
														587	Persimmons
														591	Cashewapple
														592	Kiwi fruit
														600	Papayas
														603	Other tropical fruits, n.e.c.
														604	Other tropical fruit, dried
														619	Other fruits, n.e.c.
														620	Other fruit n.e.c., dried
														622	Juice of fruits n.e.c.
														623	Fruit prepared n.e.c.
														624	Flour of fruits
														625	Fruit, nuts, peel, sugar preserved
														626	Homogenized cooked fruit, prepared
											2573	Sunflowerseed Oil	Default composition: 268 Oil, sunflower	268	Sunflower-seed oil, crude
											2574	Rape and Mustard Oil	Default composition: 271 Oil, rapeseed, 293 Oil, mustard	271	Rapeseed or canola oil, crude
											2579	Sesameseed Oil	Default composition: 290 Oil, sesame	290	Oil of sesame seed
											2563	Olives (including preserved)	Default composition: 260 Olives, 262 Olives preserved	260	Olives
														262	Olives preserved
											2570	Oilcrops, Other	Default composition: 263 Karite nuts (sheanuts), 265 Castor oil seed, 275 Tung nuts, 277 Jojoba seed, 280 Safflower seed, 296 Poppy seed, 299 Melonseed, 305 Tallowtree seed, 310 Kapok fruit, 311 Kapokseed in shell, 312 Kapokseed shelled, 333 Linseed, 336 Hempseed, 339 Oilseeds nes, 343 Flour, oilseeds	263	Karite nuts (sheanuts)
														265	Castor oil seeds
														275	Tung nuts
														280	Safflower seed
														296	Poppy seed
														299	Melonseed
														311	Kapokseed in shell
														312	Kapokseed, shelled
														333	Linseed
														336	Hempseed
														339	Other oil seeds, n.e.c.
														343	Flours and meals of oil seeds or oleaginous fruits, except those of mustard
											2562	Palm kernels	Default composition: 254 Oil, palm fruit, 256 Palm kernels	256	Palm kernels
											2559	Cottonseed	Default composition: 329 Cottonseed	329	Cotton seed
											2536	Sugar cane	Default composition: 156 Sugar cane	156	Sugar cane
											2537	Sugar beet	Default composition: 157 Sugar beet	157	Sugar beet
											2541	Sugar non-centrifugal	Default composition: 163 Sugar non-centrifugal	163	Cane sugar, non-centrifugal
											2542	Sugar (Raw Equivalent)	Default composition: 158 Sugar, cane, raw, centrifugal, 159 Sugar, beet, raw, centrifugal, 162 Sugar Raw Centrifugal, 164 Sugar refined, 168 Sugar confectionery, 171 Sugar flavoured	162	Raw cane or beet sugar (centrifugal only)
														164	Refined sugar
														168	Sugar confectionery
											2543	Sweeteners, Other	Default composition: 154 Fructose chemically pure, 155 Maltose chemically pure, 160 Maple sugar and syrups, 161 Sugar crops, nes, 165 Molasses, 166 Fructose and syrup, other, 167 Sugar, nes, 172 Glucose and dextrose, 173 Lactose, 175 Isoglucose, 633 Beverages, non alcoholic	160	Refined cane or beet sugar, in solid form, containing added flavouring or colouring matter; maple sugar and maple syrup
														161	Other sugar crops n.e.c.
														165	Molasses
														166	Other fructose and syrup
														167	Sugar and syrups n.e.c.
														173	Lactose
														175	Isoglucose
														633	Other non-alcoholic caloric beverages
											2630	Coffee and products	Default composition: 656 Coffee, green, 657 Coffee, roasted, 659 Coffee, extracts	656	Coffee, green
														657	Coffee, decaffeinated or roasted
														659	Coffee extracts
											2633	Cocoa Beans and products	Default composition: 661 Cocoa, beans, 662 Cocoa, paste, 665 Cocoa, powder & cake, 666 Chocolate products nes	661	Cocoa beans
														662	Cocoa paste not defatted
														665	Cocoa powder and cake
														666	Chocolate products nes
											2635	Tea (including mate)	Default composition: 667 Tea, 671 Maté, 672 Tea, mate extracts	667	Tea leaves
														671	Maté leaves
														672	Extracts, essences and concentrates of tea or mate, and preparations with a basis thereof or with a basis of tea or maté
											2640	Pepper	Default composition: 687 Pepper (piper spp.)	687	Pepper (Piper spp.), raw
											2641	Pimento	Default composition: 689 Chillies and peppers, dry	689	Chillies and peppers, dry (Capsicum spp., Pimenta spp.), raw
											2642	Cloves	Default composition: 698 Cloves	698	Cloves (whole stems), raw
											2645	Spices, Other	Default composition: 692 Vanilla, 693 Cinnamon (canella), 702 Nutmeg, mace and cardamoms, 711 Anise, badian, fennel, coriander, 720 Ginger, 723 Spices, nes	692	Vanilla, raw
														693	Cinnamon and cinnamon-tree flowers, raw
														702	Nutmeg, mace, cardamoms, raw
														711	Anise, badian, coriander, cumin, caraway, fennel and juniper berries, raw
														720	Ginger, raw
														723	Other stimulant, spice and aromatic crops, n.e.c.
											2731	Bovine Meat	Default composition: 867 Meat, cattle, 870 Meat, cattle, boneless (beef & veal), 872 Meat, beef, dried, salted, smoked, 873 Meat, extracts, 874 Meat, beef and veal sausages, 875 Meat, beef, preparations, 876 Meat, beef, canned, 877 Meat, homogenized preparations, 947 Meat, buffalo	867	Meat of cattle with the bone, fresh or chilled
														870	Meat of cattle boneless, fresh or chilled
														873	Extracts and juices of meat, fish, crustaceans, molluscs or other aquatic invertebrates
														874	Sausages and similar products of meat, offal or blood of beef and veal
														875	beef and veal preparations nes
														877	Homogenized meat preparations
														947	Meat of buffalo, fresh or chilled
											2733	Pigmeat	Default composition: 1035 Meat, pig, 1038 Meat, pork, 1039 Bacon and ham, 1041 Meat, pig sausages, 1042 Meat, pig, preparations	1035	Meat of pig with the bone, fresh or chilled
														1038	Meat of pig boneless, fresh or chilled
														1039	Pig meat, cuts, salted, dried or smoked (bacon and ham)
														1041	Sausages and similar products of meat, offal or blood of pig
														1042	Pig meat preparations
											2734	Poultry Meat	Default composition: 1058 Meat, chicken, 1060 Fat, liver prepared (foie gras), 1061 Meat, chicken, canned, 1069 Meat, duck, 1073 Meat, goose and guinea fowl, 1080 Meat, turkey	1058	Meat of chickens, fresh or chilled
														1060	Fatty liver preparations
														1061	Poultry meat preparations
														1069	Meat of ducks, fresh or chilled
														1073	Meat of geese, fresh or chilled
														1080	Meat of turkeys, fresh or chilled
											2732	Mutton & Goat Meat	Default composition: 977 Meat, sheep, 1017 Meat, goat	977	Meat of sheep, fresh or chilled
														1017	Meat of goat, fresh or chilled
											2735	Meat, Other	Default composition: 1089 Meat, bird nes, 1097 Meat, horse, 1108 Meat, ass, 1111 Meat, mule, 1127 Meat, camel, 1141 Meat, rabbit, 1151 Meat, other rodents, 1158 Meat, other camelids, 1163 Meat, game, 1164 Meat, dried nes, 1166 Meat, nes, 1172 Meat, nes, preparations, 1176 Snails, not sea	1089	Meat of pigeons and other birds n.e.c., fresh, chilled or frozen
														1097	Horse meat, fresh or chilled
														1108	Meat of asses, fresh or chilled
														1127	Meat of camels, fresh or chilled
														1141	Meat of rabbits and hares, fresh or chilled
														1163	Game meat, fresh, chilled or frozen
														1164	Other meat and edible meat offal, salted, in brine, dried or smoked; edible flours and meals of meat or meat offal
														1166	Other meat of mammals, fresh or chilled
														1172	Meat prepared n.e.c.
											2745	Honey	Default composition: 1182 Honey, natural	1182	Natural honey
											2736	Offals, Edible	Default composition: 868 Offals, edible, cattle, 878 Liver prep., 948 Offals, edible, buffaloes, 978 Offals, sheep,edible, 1018 Offals, edible, goats, 1036 Offals, pigs, edible, 1059 Offals, liver chicken, 1074 Offals, liver geese, 1075 Offals, liver duck, 1081 Offals, liver turkeys, 1098 Offals, horses, 1128 Offals, edible, camels, 1159 Offals, other camelids, 1167 Offals, nes	868	Edible offal of cattle, fresh, chilled or frozen
														878	Liver preparations
														948	Edible offal of buffalo, fresh, chilled or frozen
														978	Edible offal of sheep, fresh, chilled or frozen
														1018	Edible offal of goat, fresh, chilled or frozen
														1036	Edible offal of pigs, fresh, chilled or frozen
														1059	Edible offals and liver of chickens and guinea fowl, fresh, chilled or frozen
														1074	Edible offals and liver of geese, fresh, chilled or frozen
														1075	Edible offals and liver of ducks, fresh, chilled or frozen
														1081	Edible offals and liver of turkey, fresh, chilled or frozen
														1098	Edible offals of horses and other equines, fresh, chilled or frozen
														1167	Offals n.e.c. (excluding mammals), fresh, chilled or frozen
											2737	Fats, Animals, Raw	Default composition: 869 Fat, cattle, 871 Fat, cattle butcher, 949 Fat, buffaloes, 979 Fat, sheep, 994 Grease incl. lanolin wool, 1019 Fat, goats, 1037 Fat, pigs, 1040 Fat, pig butcher, 1043 Lard, 1065 Fat, poultry, 1066 Fat, poultry, rendered, 1129 Fat, camels, 1160 Fat, other camelids, 1168 Oils, fats of animal nes, 1221 Lard stearine oil, 1222 Degras, 1225 Tallow, 1243 Fat, nes, prepared	869	Cattle fat, unrendered
														871	Cattle, butcher fat
														979	Sheep fat, unrendered
														994	Wool grease and lanolin
														1037	Fat of pigs
														1040	Pig, butcher fat
														1043	Pig fat, rendered
														1065	Fat of poultry
														1066	Poultry fat, rendered
														1129	Fat of camels
														1168	Animal oils and fats n.e.c.
														1221	Lard stearine and lard oil
														1222	Degras
														1225	Tallow
														1243	Fat preparations n.e.c.
											2744	Eggs	Default composition: 916 Egg albumine, 1062 Eggs, hen, in shell, 1063 Eggs, liquid, 1064 Eggs, dried, 1091 Eggs, other bird, in shell	1062	Hen eggs in shell, fresh
														1063	Eggs, liquid
														1064	Eggs, dried
														1091	Eggs from other birds in shell, fresh, n.e.c.
											2848	Milk - Excluding Butter	Default composition: 882 Milk, whole fresh cow, 888 Milk, skimmed cow, 889 Milk, whole condensed, 890 Whey, condensed, 891 Yoghurt, 892 Yoghurt, concentrated or not, 893 Buttermilk, curdled, acidified milk, 894 Milk, whole evaporated, 895 Milk, skimmed evaporated, 896 Milk, skimmed condensed, 897 Milk, whole dried, 898 Milk, skimmed dried, 899 Milk, dry buttermilk, 900 Whey, dry, 901 Cheese, whol…	882	Raw milk of cattle
														888	Skim milk of cows
														889	Whole milk, condensed
														890	Whey, condensed
														891	Yoghurt
														892	Yoghurt, with additives
														893	Buttermilk, curdled and acidified milk
														894	Whole milk, evaporated
														895	Skim milk, evaporated
														896	Skim milk, condensed
														897	Whole milk powder
														898	Skim milk and whey powder
														899	Buttermilk, dry
														900	Whey, dry
														901	Cheese from whole cow milk
														903	Whey, fresh
														904	Cheese from skimmed cow milk
														905	Whey cheese
														907	Processed cheese
														908	Reconstituted milk
														909	Dairy products n.e.c.
														910	Ice cream and other edible ice
														982	Raw milk of sheep
														984	Cheese from milk of sheep, fresh or processed
														1021	Cheese from milk of goats, fresh or processed
														1030	Hair, goat, fine
											2761	Freshwater Fish	Default composition: 1501 Frwtr Diad F, 1502 Frwtr Fz Whl, 1503 Frwtr Fillet, 1504 Frwtr Fz Flt, 1505 Frwtr Cured, 1506 Frwtr Canned, 1507 Frwtr Pr nes, 1508 Frwtr Meals
											2762	Demersal Fish	Default composition: 1514 Dmrsl Fresh, 1515 Dmrsl Fz Whl, 1516 Dmrsl Fillet, 1517 Dmrsl Fz Flt, 1518 Dmrsl Cured, 1519 Dmrsl Canned, 1520 Dmrsl Pr nes, 1521 Dmrsl Meals
											2763	Pelagic Fish	Default composition: 1527 Pelagic Frsh, 1528 Pelgc Fz Whl, 1529 Pelgc Fillet, 1530 Pelgc Fz Flt, 1531 Pelgc Cured, 1532 Pelgc Canned, 1533 Pelgc Pr nes, 1534 Pelgc Meals
											2764	Marine Fish, Other	Default composition: 1540 Marine nes F, 1541 Marin Fz Whl, 1542 Marin Fillet, 1543 Marin Fz Flt, 1544 Marin Cured, 1545 Marin Canned, 1546 Marin Pr nes, 1547 Marin Meals
											2765	Crustaceans	Default composition: 1553 Crstaceans F, 1554 Crstc Frozen, 1555 Crstc Cured, 1556 Crstc Canned, 1557 Crstc Pr nes, 1558 Crstc Meals
											2766	Cephalopods	Default composition: 1570 Cephlp Fresh, 1571 Cphlp Frozen, 1572 Cphlp Cured, 1573 Cphlp Canned, 1574 Cphlp Pr nes, 1575 Cphlp Meals
											2767	Molluscs, Other	Default composition: 1562 Mlluscs Frsh, 1563 Molsc Frozen, 1564 Molsc Cured, 1565 Molsc Canned, 1566 Molsc Meals
											2769	Aquatic Animals, Others	Default composition: 1587 Aqutc Anim F, 1588 Aq A Cured, 1589 Aquatic Animals Meals, 1590 Aq A Prep Ns
											2775	Aquatic Plants	Default composition: 1594 Aquatic plants, fresh, 1595 Aquatic plants, dried, 1596 Aquatic plants, other preparations
											2768	Meat, Aquatic Mammals	Default composition: 1580 Aq M Meat, 1583 Aq M Prep Ns
											2571	Soyabean Oil	Default composition: 237 Oil, soybean	237	Soya bean oil
											2572	Groundnut Oil	Default composition: 244 Oil, groundnut	244	Groundnut oil
											2573	Sunflowerseed Oil	Default composition: 268 Oil, sunflower	268	Sunflower-seed oil, crude
											2574	Rape and Mustard Oil	Default composition: 271 Oil, rapeseed, 293 Oil, mustard	271	Rapeseed or canola oil, crude
											2575	Cottonseed Oil	Default composition: 331 Oil, cottonseed	331	Cottonseed oil
											2576	Palmkernel Oil	Default composition: 258 Oil, palm kernel	258	Oil of palm kernel
											2577	Palm Oil	Default composition: 257 Oil, palm, 1276 Fatty acids, 1277 Fatty substance residues	257	Palm oil
											2578	Coconut Oil	Default composition: 252 Oil, coconut (copra)	252	Coconut oil
											2579	Sesameseed Oil	Default composition: 290 Oil, sesame	290	Oil of sesame seed
											2580	Olive Oil	Default composition: 261 Oil, olive, virgin, 274 Oil, olive residues	261	Olive oil
											2581	Ricebran Oil	Default composition: 36 Oil, rice bran	36	Oil of rice bran
											2582	Maize Germ Oil	Default composition: 60 Oil, maize	60	Oil of maize
											2586	Oilcrops Oil, Other	Default composition: 264 Butter of karite nuts, 266 Oil, castor beans, 276 Oil, tung nuts, 278 Oil, jojoba, 281 Oil, safflower, 297 Oil, poppy, 306 Vegetable tallow, 307 Oil, stillingia, 313 Oil, kapok, 334 Oil, linseed, 337 Oil, hempseed, 340 Oil, vegetable origin nes, 664 Cocoa, butter, 1241 Margarine, liquid, 1242 Margarine, short, 1273 Castor oil, hydrogenated (opal wax), 1274 Oil, boiled etc…	264	Butter of karite nuts
														266	Oil of castor beans
														276	Oil of tung nuts
														278	Jojoba oil
														281	Safflower-seed oil, crude
														297	Oil of poppy seed
														306	Vegetable tallow
														313	Oil of kapok
														334	Oil of linseed
														340	Other oil of vegetable origin, crude n.e.c.
														664	Cocoa butter, fat and oil
														1241	Liquid margarine
														1242	Margarine and shortening
														1274	Animal or vegetable fats and oils and their fractions, chemically modified, except those hydrogenated, inter-esterified, re-esterified or elaidinized; inedible mixtures or preparations of animal or vegetable fats or oils
														1275	hydrogenated oils and fats
											2740	Butter, Ghee	Default composition: 886 Butter, cow milk, 887 Ghee, butteroil of cow milk, 952 Butter, buffalo milk, 953 Ghee, of buffalo milk, 983 Butter and ghee, sheep milk, 1022 Butter of goat mlk	886	Butter of cow milk
														887	Ghee from cow milk
														953	Ghee from buffalo milk
														983	Butter and ghee of sheep milk
														1022	Butter of goat milk
											2743	Cream	Default composition: 885 Cream fresh	885	Cream, fresh
											2680	Infant food	Default composition: 109 Infant food	109	Infant food
											2655	Wine	Default composition: 564 Wine, 565 Vermouths & similar	564	Wine
														565	Vermouth and other wine of fresh grapes flavoured with plats or aromatic substances
											2656	Beer	Default composition: 51 Beer of barley	51	Beer of barley, malted
											2657	Beverages, Fermented	Default composition: 26 Beverages, fermented wheat, 39 Beverages, fermented rice, 66 Beer of maize, 82 Beer of millet, 86 Beer of sorghum, 517 Cider etc	39	Rice-fermented beverages
														86	Beer of sorghum, malted
														517	Cider and other fermented beverages
											2658	Beverages, Alcoholic	Default composition: 634 Beverages, distilled alcoholic	634	Undenatured ethyl alcohol of an alcoholic strength by volume of less than 80% vol; spirits, liqueurs and other spirituous beverages
											2781	Fish, Body Oil	Default composition: 1509 Frwt Bdy Oil, 1522 Dmrs Bdy Oil, 1535 Pelg Bdy Oil, 1548 Marn Bdy Oil, 1582 Aq M Oils
											2782	Fish, Liver Oil	Default composition: 1510 Frwt Lvr Oil, 1523 Demersal Liver Oils, 1536 Pelg Lvr Oil, 1549 Marine nes Liver Oils
											Note: Based on the FAOSTAT Item Codes and coverage, the food in the FBS and FAO trade matrix is matched

## Sheet: Table S5 FLW EXIO industries
	production	production	production	production	production	production	production	production	production	production	production	production	production	production					production																processing	processing	processing	processing	processing	processing	processing	processing	processing	processing	processing
	Cultivation of paddy rice	Cultivation of wheat	Cultivation of cereal grains nec	Cultivation of vegetables, fruit, nuts	Cultivation of oil seeds	Cultivation of sugar cane, sugar beet	Cultivation of plant-based fibers	Cultivation of crops nec	Cattle farming	Pigs farming	Poultry farming	Meat animals nec	Animal products nec	Raw milk	Wool, silk-worm cocoons	Manure treatment (conventional), storage and land application	Manure treatment (biogas), storage and land application	Forestry, logging and related service activities	Fishing, operating of fish hatcheries and fish farms; service activities incidental to fishing (05)	Mining of coal and lignite; extraction of peat	Extraction of crude petroleum and services related to crude oil extraction, excluding surveying	Extraction of natural gas and services related to natural gas extraction, excluding surveying	Extraction, liquefaction, and regasification of other petroleum and gaseous materials	Mining of uranium and thorium ores	Mining of iron ores	Mining of copper ores and concentrates	Mining of nickel ores and concentrates	Mining of aluminium ores and concentrates	Mining of precious metal ores and concentrates	Mining of lead, zinc and tin ores and concentrates	Mining of other non-ferrous metal ores and concentrates	Quarrying of stone	Quarrying of sand and clay	Mining of chemical and fertilizer minerals, production of salt, other mining and quarrying n.e.c.	Processing of meat cattle	Processing of meat pigs	Processing of meat poultry	Production of meat products nec	Processing vegetable oils and fats	Processing of dairy products	Processed rice	Sugar refining	Processing of Food products nec	Manufacture of beverages	Manufacture of fish products	Manufacture of tobacco products	Manufacture of textiles	Manufacture of wearing apparel; dressing and dyeing of fur	Tanning and dressing of leather; manufacture of luggage, handbags, saddlery, harness and footwear (19)
Rice and products	1	0	0	0	0	0	0	0	0	0	0	0	0	0	0	0	0	0	0	0	0	0	0	0	0	0	0	0	0	0	0	0	0	0	0	0	0	0	0	0	1	0	0	0	0	0	0	0	0
Wheat and products	0	1	0	0	0	0	0	0	0	0	0	0	0	0	0	0	0	0	0	0	0	0	0	0	0	0	0	0	0	0	0	0	0	0	0	0	0	0	0	0	0	0	1	0	0	0	0	0	0
Barley and products	0	0	1	0	0	0	0	0	0	0	0	0	0	0	0	0	0	0	0	0	0	0	0	0	0	0	0	0	0	0	0	0	0	0	0	0	0	0	0	0	0	0	1	0	0	0	0	0	0
Maize and products	0	0	1	0	0	0	0	0	0	0	0	0	0	0	0	0	0	0	0	0	0	0	0	0	0	0	0	0	0	0	0	0	0	0	0	0	0	0	0	0	0	0	1	0	0	0	0	0	0
Rye and products	0	0	1	0	0	0	0	0	0	0	0	0	0	0	0	0	0	0	0	0	0	0	0	0	0	0	0	0	0	0	0	0	0	0	0	0	0	0	0	0	0	0	1	0	0	0	0	0	0
Oats	0	0	1	0	0	0	0	0	0	0	0	0	0	0	0	0	0	0	0	0	0	0	0	0	0	0	0	0	0	0	0	0	0	0	0	0	0	0	0	0	0	0	1	0	0	0	0	0	0
Millet and products	0	0	1	0	0	0	0	0	0	0	0	0	0	0	0	0	0	0	0	0	0	0	0	0	0	0	0	0	0	0	0	0	0	0	0	0	0	0	0	0	0	0	1	0	0	0	0	0	0
Sorghum and products	0	0	1	0	0	0	0	0	0	0	0	0	0	0	0	0	0	0	0	0	0	0	0	0	0	0	0	0	0	0	0	0	0	0	0	0	0	0	0	0	0	0	1	0	0	0	0	0	0
Cereals,Other	0	0	1	0	0	0	0	0	0	0	0	0	0	0	0	0	0	0	0	0	0	0	0	0	0	0	0	0	0	0	0	0	0	0	0	0	0	0	0	0	0	0	1	0	0	0	0	0	0
Cassava and products	0	0	0	1	0	0	0	0	0	0	0	0	0	0	0	0	0	0	0	0	0	0	0	0	0	0	0	0	0	0	0	0	0	0	0	0	0	0	0	0	0	0	1	0	0	0	0	0	0
Potatoes and products	0	0	0	1	0	0	0	0	0	0	0	0	0	0	0	0	0	0	0	0	0	0	0	0	0	0	0	0	0	0	0	0	0	0	0	0	0	0	0	0	0	0	1	0	0	0	0	0	0
Sweet potatoes	0	0	0	1	0	0	0	0	0	0	0	0	0	0	0	0	0	0	0	0	0	0	0	0	0	0	0	0	0	0	0	0	0	0	0	0	0	0	0	0	0	0	1	0	0	0	0	0	0
Yams	0	0	0	1	0	0	0	0	0	0	0	0	0	0	0	0	0	0	0	0	0	0	0	0	0	0	0	0	0	0	0	0	0	0	0	0	0	0	0	0	0	0	1	0	0	0	0	0	0
Roots,Other	0	0	0	1	0	0	0	0	0	0	0	0	0	0	0	0	0	0	0	0	0	0	0	0	0	0	0	0	0	0	0	0	0	0	0	0	0	0	0	0	0	0	1	0	0	0	0	0	0
Beans	0	0	0	1	0	0	0	0	0	0	0	0	0	0	0	0	0	0	0	0	0	0	0	0	0	0	0	0	0	0	0	0	0	0	0	0	0	0	0	0	0	0	1	0	0	0	0	0	0
Peas	0	0	0	1	0	0	0	0	0	0	0	0	0	0	0	0	0	0	0	0	0	0	0	0	0	0	0	0	0	0	0	0	0	0	0	0	0	0	0	0	0	0	1	0	0	0	0	0	0
Pulses,Other and products	0	0	0	1	0	0	0	0	0	0	0	0	0	0	0	0	0	0	0	0	0	0	0	0	0	0	0	0	0	0	0	0	0	0	0	0	0	0	0	0	0	0	1	0	0	0	0	0	0
Nuts and products	0	0	0	1	0	0	0	0	0	0	0	0	0	0	0	0	0	0	0	0	0	0	0	0	0	0	0	0	0	0	0	0	0	0	0	0	0	0	0	0	0	0	1	0	0	0	0	0	0
Soyabeans	0	0	0	1	0	0	0	0	0	0	0	0	0	0	0	0	0	0	0	0	0	0	0	0	0	0	0	0	0	0	0	0	0	0	0	0	0	0	0	0	0	0	1	0	0	0	0	0	0
Groundnuts (Shelled Eq)	0	0	0	1	0	0	0	0	0	0	0	0	0	0	0	0	0	0	0	0	0	0	0	0	0	0	0	0	0	0	0	0	0	0	0	0	0	0	0	0	0	0	1	0	0	0	0	0	0
Coconuts -Incl Copra	0	0	0	1	0	0	0	0	0	0	0	0	0	0	0	0	0	0	0	0	0	0	0	0	0	0	0	0	0	0	0	0	0	0	0	0	0	0	0	0	0	0	1	0	0	0	0	0	0
Tomatoes and products	0	0	0	1	0	0	0	0	0	0	0	0	0	0	0	0	0	0	0	0	0	0	0	0	0	0	0	0	0	0	0	0	0	0	0	0	0	0	0	0	0	0	1	0	0	0	0	0	0
Onions	0	0	0	1	0	0	0	0	0	0	0	0	0	0	0	0	0	0	0	0	0	0	0	0	0	0	0	0	0	0	0	0	0	0	0	0	0	0	0	0	0	0	1	0	0	0	0	0	0
Vegetables,Other	0	0	0	1	0	0	0	0	0	0	0	0	0	0	0	0	0	0	0	0	0	0	0	0	0	0	0	0	0	0	0	0	0	0	0	0	0	0	0	0	0	0	1	0	0	0	0	0	0
Oranges,Mandarines	0	0	0	1	0	0	0	0	0	0	0	0	0	0	0	0	0	0	0	0	0	0	0	0	0	0	0	0	0	0	0	0	0	0	0	0	0	0	0	0	0	0	1	0	0	0	0	0	0
Lemons,Limes and products	0	0	0	1	0	0	0	0	0	0	0	0	0	0	0	0	0	0	0	0	0	0	0	0	0	0	0	0	0	0	0	0	0	0	0	0	0	0	0	0	0	0	1	0	0	0	0	0	0
Grapefruit and products	0	0	0	1	0	0	0	0	0	0	0	0	0	0	0	0	0	0	0	0	0	0	0	0	0	0	0	0	0	0	0	0	0	0	0	0	0	0	0	0	0	0	1	0	0	0	0	0	0
Citrus,Other	0	0	0	1	0	0	0	0	0	0	0	0	0	0	0	0	0	0	0	0	0	0	0	0	0	0	0	0	0	0	0	0	0	0	0	0	0	0	0	0	0	0	1	0	0	0	0	0	0
Bananas	0	0	0	1	0	0	0	0	0	0	0	0	0	0	0	0	0	0	0	0	0	0	0	0	0	0	0	0	0	0	0	0	0	0	0	0	0	0	0	0	0	0	1	0	0	0	0	0	0
Plantains	0	0	0	1	0	0	0	0	0	0	0	0	0	0	0	0	0	0	0	0	0	0	0	0	0	0	0	0	0	0	0	0	0	0	0	0	0	0	0	0	0	0	1	0	0	0	0	0	0
Apples and products	0	0	0	1	0	0	0	0	0	0	0	0	0	0	0	0	0	0	0	0	0	0	0	0	0	0	0	0	0	0	0	0	0	0	0	0	0	0	0	0	0	0	1	0	0	0	0	0	0
Pineapples and products	0	0	0	1	0	0	0	0	0	0	0	0	0	0	0	0	0	0	0	0	0	0	0	0	0	0	0	0	0	0	0	0	0	0	0	0	0	0	0	0	0	0	1	0	0	0	0	0	0
Dates	0	0	0	1	0	0	0	0	0	0	0	0	0	0	0	0	0	0	0	0	0	0	0	0	0	0	0	0	0	0	0	0	0	0	0	0	0	0	0	0	0	0	1	0	0	0	0	0	0
Grapes and products (excl wine)	0	0	0	1	0	0	0	0	0	0	0	0	0	0	0	0	0	0	0	0	0	0	0	0	0	0	0	0	0	0	0	0	0	0	0	0	0	0	0	0	0	0	1	0	0	0	0	0	0
Fruits,Other	0	0	0	1	0	0	0	0	0	0	0	0	0	0	0	0	0	0	0	0	0	0	0	0	0	0	0	0	0	0	0	0	0	0	0	0	0	0	0	0	0	0	1	0	0	0	0	0	0
Sunflower seed	0	0	0	0	1	0	0	0	0	0	0	0	0	0	0	0	0	0	0	0	0	0	0	0	0	0	0	0	0	0	0	0	0	0	0	0	0	0	0	0	0	0	1	0	0	0	0	0	0
Rape and Mustardseed	0	0	0	0	1	0	0	0	0	0	0	0	0	0	0	0	0	0	0	0	0	0	0	0	0	0	0	0	0	0	0	0	0	0	0	0	0	0	0	0	0	0	1	0	0	0	0	0	0
Sesameseed	0	0	0	0	1	0	0	0	0	0	0	0	0	0	0	0	0	0	0	0	0	0	0	0	0	0	0	0	0	0	0	0	0	0	0	0	0	0	0	0	0	0	1	0	0	0	0	0	0
Olives (including preserved)	0	0	0	0	1	0	0	0	0	0	0	0	0	0	0	0	0	0	0	0	0	0	0	0	0	0	0	0	0	0	0	0	0	0	0	0	0	0	0	0	0	0	1	0	0	0	0	0	0
Oilcrops,Other	0	0	0	0	1	0	0	0	0	0	0	0	0	0	0	0	0	0	0	0	0	0	0	0	0	0	0	0	0	0	0	0	0	0	0	0	0	0	0	0	0	0	1	0	0	0	0	0	0
Palm kernels	0	0	0	0	1	0	0	0	0	0	0	0	0	0	0	0	0	0	0	0	0	0	0	0	0	0	0	0	0	0	0	0	0	0	0	0	0	0	0	0	0	0	1	0	0	0	0	0	0
Cottonseed	0	0	0	0	1	0	0	0	0	0	0	0	0	0	0	0	0	0	0	0	0	0	0	0	0	0	0	0	0	0	0	0	0	0	0	0	0	0	0	0	0	0	1	0	0	0	0	0	0
Sugar cane	0	0	0	0	0	1	0	0	0	0	0	0	0	0	0	0	0	0	0	0	0	0	0	0	0	0	0	0	0	0	0	0	0	0	0	0	0	0	0	0	0	0	1	0	0	0	0	0	0
Sugar beet	0	0	0	0	0	1	0	0	0	0	0	0	0	0	0	0	0	0	0	0	0	0	0	0	0	0	0	0	0	0	0	0	0	0	0	0	0	0	0	0	0	0	1	0	0	0	0	0	0
Sugar non-centrifugal	0	0	0	0	0	1	0	0	0	0	0	0	0	0	0	0	0	0	0	0	0	0	0	0	0	0	0	0	0	0	0	0	0	0	0	0	0	0	0	0	0	0	1	0	0	0	0	0	0
Sugar (Raw Equivalent)	0	0	0	0	0	1	0	0	0	0	0	0	0	0	0	0	0	0	0	0	0	0	0	0	0	0	0	0	0	0	0	0	0	0	0	0	0	0	0	0	0	0	1	0	0	0	0	0	0
Sweeteners,Other	0	0	0	0	0	1	0	0	0	0	0	0	0	0	0	0	0	0	0	0	0	0	0	0	0	0	0	0	0	0	0	0	0	0	0	0	0	0	0	0	0	0	1	0	0	0	0	0	0
Coffee and products	0	0	0	0	0	0	0	1	0	0	0	0	0	0	0	0	0	0	0	0	0	0	0	0	0	0	0	0	0	0	0	0	0	0	0	0	0	0	0	0	0	0	1	0	0	0	0	0	0
Cocoa Beans and products	0	0	0	0	0	0	0	1	0	0	0	0	0	0	0	0	0	0	0	0	0	0	0	0	0	0	0	0	0	0	0	0	0	0	0	0	0	0	0	0	0	0	1	0	0	0	0	0	0
Tea (including mate)	0	0	0	0	0	0	0	1	0	0	0	0	0	0	0	0	0	0	0	0	0	0	0	0	0	0	0	0	0	0	0	0	0	0	0	0	0	0	0	0	0	0	1	0	0	0	0	0	0
Pepper	0	0	0	0	0	0	0	1	0	0	0	0	0	0	0	0	0	0	0	0	0	0	0	0	0	0	0	0	0	0	0	0	0	0	0	0	0	0	0	0	0	0	1	0	0	0	0	0	0
Pimento	0	0	0	0	0	0	0	1	0	0	0	0	0	0	0	0	0	0	0	0	0	0	0	0	0	0	0	0	0	0	0	0	0	0	0	0	0	0	0	0	0	0	1	0	0	0	0	0	0
Cloves	0	0	0	0	0	0	0	1	0	0	0	0	0	0	0	0	0	0	0	0	0	0	0	0	0	0	0	0	0	0	0	0	0	0	0	0	0	0	0	0	0	0	1	0	0	0	0	0	0
Spices,Other	0	0	0	0	0	0	0	1	0	0	0	0	0	0	0	0	0	0	0	0	0	0	0	0	0	0	0	0	0	0	0	0	0	0	0	0	0	0	0	0	0	0	1	0	0	0	0	0	0
Cattle farming	0	0	0	0	0	0	0	0	1	0	0	0	0	0	0	0	0	0	0	0	0	0	0	0	0	0	0	0	0	0	0	0	0	0	1	0	0	0	0	0	0	0	0	0	0	0	0	0	0
Pigs farming	0	0	0	0	0	0	0	0	0	1	0	0	0	0	0	0	0	0	0	0	0	0	0	0	0	0	0	0	0	0	0	0	0	0	0	1	0	0	0	0	0	0	0	0	0	0	0	0	0
Poultry farming	0	0	0	0	0	0	0	0	0	0	1	0	0	0	0	0	0	0	0	0	0	0	0	0	0	0	0	0	0	0	0	0	0	0	0	0	1	0	0	0	0	0	0	0	0	0	0	0	0
Mutton &Goat farming	0	0	0	0	0	0	0	0	0	0	0	1	0	0	0	0	0	0	0	0	0	0	0	0	0	0	0	0	0	0	0	0	0	0	0	0	0	1	0	0	0	0	0	0	0	0	0	0	0
Meat animals farming	0	0	0	0	0	0	0	0	0	0	0	1	0	0	0	0	0	0	0	0	0	0	0	0	0	0	0	0	0	0	0	0	0	0	0	0	0	1	0	0	0	0	0	0	0	0	0	0	0
Honey	0	0	0	0	0	0	0	0	0	0	0	0	1	0	0	0	0	0	0	0	0	0	0	0	0	0	0	0	0	0	0	0	0	0	0	0	0	0	0	0	0	0	1	0	0	0	0	0	0
Offals, Edible	0	0	0	0	0	0	0	0	0	0	0	0	1	0	0	0	0	0	0	0	0	0	0	0	0	0	0	0	0	0	0	0	0	0	0	0	0	0	0	0	0	0	1	0	0	0	0	0	0
Fats,Animals,Raw	0	0	0	0	0	0	0	0	0	0	0	0	1	0	0	0	0	0	0	0	0	0	0	0	0	0	0	0	0	0	0	0	0	0	0	0	0	0	0	0	0	0	1	0	0	0	0	0	0
Eggs	0	0	0	0	0	0	0	0	0	0	0	0	1	0	0	0	0	0	0	0	0	0	0	0	0	0	0	0	0	0	0	0	0	0	0	0	0	0	0	0	0	0	1	0	0	0	0	0	0
Milk - Excluding Butter	0	0	0	0	0	0	0	0	0	0	0	0	0	1	0	0	0	0	0	0	0	0	0	0	0	0	0	0	0	0	0	0	0	0	0	0	0	0	0	0	0	0	1	0	0	0	0	0	0
Freshwater Fish	0	0	0	0	0	0	0	0	0	0	0	0	0	0	0	0	0	0	1	0	0	0	0	0	0	0	0	0	0	0	0	0	0	0	0	0	0	0	0	0	0	0	0	0	1	0	0	0	0
Demersal Fish	0	0	0	0	0	0	0	0	0	0	0	0	0	0	0	0	0	0	1	0	0	0	0	0	0	0	0	0	0	0	0	0	0	0	0	0	0	0	0	0	0	0	0	0	1	0	0	0	0
Pelagic Fish	0	0	0	0	0	0	0	0	0	0	0	0	0	0	0	0	0	0	1	0	0	0	0	0	0	0	0	0	0	0	0	0	0	0	0	0	0	0	0	0	0	0	0	0	1	0	0	0	0
Marine Fish,Other	0	0	0	0	0	0	0	0	0	0	0	0	0	0	0	0	0	0	1	0	0	0	0	0	0	0	0	0	0	0	0	0	0	0	0	0	0	0	0	0	0	0	0	0	1	0	0	0	0
Crustaceans	0	0	0	0	0	0	0	0	0	0	0	0	0	0	0	0	0	0	1	0	0	0	0	0	0	0	0	0	0	0	0	0	0	0	0	0	0	0	0	0	0	0	0	0	1	0	0	0	0
Cephalopods	0	0	0	0	0	0	0	0	0	0	0	0	0	0	0	0	0	0	1	0	0	0	0	0	0	0	0	0	0	0	0	0	0	0	0	0	0	0	0	0	0	0	0	0	1	0	0	0	0
Molluscs,Other	0	0	0	0	0	0	0	0	0	0	0	0	0	0	0	0	0	0	1	0	0	0	0	0	0	0	0	0	0	0	0	0	0	0	0	0	0	0	0	0	0	0	0	0	1	0	0	0	0
Aquatic Animals,Others	0	0	0	0	0	0	0	0	0	0	0	0	0	0	0	0	0	0	1	0	0	0	0	0	0	0	0	0	0	0	0	0	0	0	0	0	0	0	0	0	0	0	0	0	1	0	0	0	0
Aquatic Plants	0	0	0	0	0	0	0	0	0	0	0	0	0	0	0	0	0	0	1	0	0	0	0	0	0	0	0	0	0	0	0	0	0	0	0	0	0	0	0	0	0	0	0	0	1	0	0	0	0
Meat,Aquatic Mammals	0	0	0	0	0	0	0	0	0	0	0	0	0	0	0	0	0	0	1	0	0	0	0	0	0	0	0	0	0	0	0	0	0	0	0	0	0	0	0	0	0	0	0	0	1	0	0	0	0
Soyabean Oil	0	0	0	0	0	0	0	0	0	0	0	0	0	0	0	0	0	0	0	0	0	0	0	0	0	0	0	0	0	0	0	0	0	0	0	0	0	0	1	0	0	0	0	0	0	0	0	0	0
Groundnut Oil	0	0	0	0	0	0	0	0	0	0	0	0	0	0	0	0	0	0	0	0	0	0	0	0	0	0	0	0	0	0	0	0	0	0	0	0	0	0	1	0	0	0	0	0	0	0	0	0	0
Sunflowerseed Oi	0	0	0	0	0	0	0	0	0	0	0	0	0	0	0	0	0	0	0	0	0	0	0	0	0	0	0	0	0	0	0	0	0	0	0	0	0	0	1	0	0	0	0	0	0	0	0	0	0
Rape and Mustard Oil	0	0	0	0	0	0	0	0	0	0	0	0	0	0	0	0	0	0	0	0	0	0	0	0	0	0	0	0	0	0	0	0	0	0	0	0	0	0	1	0	0	0	0	0	0	0	0	0	0
Cottonseed Oil	0	0	0	0	0	0	0	0	0	0	0	0	0	0	0	0	0	0	0	0	0	0	0	0	0	0	0	0	0	0	0	0	0	0	0	0	0	0	1	0	0	0	0	0	0	0	0	0	0
Palmkernel Oi	0	0	0	0	0	0	0	0	0	0	0	0	0	0	0	0	0	0	0	0	0	0	0	0	0	0	0	0	0	0	0	0	0	0	0	0	0	0	1	0	0	0	0	0	0	0	0	0	0
Palm Oil	0	0	0	0	0	0	0	0	0	0	0	0	0	0	0	0	0	0	0	0	0	0	0	0	0	0	0	0	0	0	0	0	0	0	0	0	0	0	1	0	0	0	0	0	0	0	0	0	0
Coconut Oil	0	0	0	0	0	0	0	0	0	0	0	0	0	0	0	0	0	0	0	0	0	0	0	0	0	0	0	0	0	0	0	0	0	0	0	0	0	0	1	0	0	0	0	0	0	0	0	0	0
Sesameseed Oil	0	0	0	0	0	0	0	0	0	0	0	0	0	0	0	0	0	0	0	0	0	0	0	0	0	0	0	0	0	0	0	0	0	0	0	0	0	0	1	0	0	0	0	0	0	0	0	0	0
Olive Oil	0	0	0	0	0	0	0	0	0	0	0	0	0	0	0	0	0	0	0	0	0	0	0	0	0	0	0	0	0	0	0	0	0	0	0	0	0	0	1	0	0	0	0	0	0	0	0	0	0
Ricebran Oi	0	0	0	0	0	0	0	0	0	0	0	0	0	0	0	0	0	0	0	0	0	0	0	0	0	0	0	0	0	0	0	0	0	0	0	0	0	0	1	0	0	0	0	0	0	0	0	0	0
Maize Germ Oil	0	0	0	0	0	0	0	0	0	0	0	0	0	0	0	0	0	0	0	0	0	0	0	0	0	0	0	0	0	0	0	0	0	0	0	0	0	0	1	0	0	0	0	0	0	0	0	0	0
Oilcrops Oil,Other	0	0	0	0	0	0	0	0	0	0	0	0	0	0	0	0	0	0	0	0	0	0	0	0	0	0	0	0	0	0	0	0	0	0	0	0	0	0	1	0	0	0	0	0	0	0	0	0	0
Butter,Ghee	0	0	0	0	0	0	0	0	0	0	0	0	0	0	0	0	0	0	0	0	0	0	0	0	0	0	0	0	0	0	0	0	0	0	0	0	0	0	0	1	0	0	0	0	0	0	0	0	0
Cream	0	0	0	0	0	0	0	0	0	0	0	0	0	0	0	0	0	0	0	0	0	0	0	0	0	0	0	0	0	0	0	0	0	0	0	0	0	0	0	1	0	0	0	0	0	0	0	0	0
Infant food	0	0	0	0	0	0	0	0	0	0	0	0	0	0	0	0	0	0	0	0	0	0	0	0	0	0	0	0	0	0	0	0	0	0	0	0	0	0	0	0	0	0	1	0	0	0	0	0	0
Wine	0	0	0	0	0	0	0	0	0	0	0	0	0	0	0	0	0	0	0	0	0	0	0	0	0	0	0	0	0	0	0	0	0	0	0	0	0	0	0	0	0	0	0	1	0	0	0	0	0
Beer	0	0	0	0	0	0	0	0	0	0	0	0	0	0	0	0	0	0	0	0	0	0	0	0	0	0	0	0	0	0	0	0	0	0	0	0	0	0	0	0	0	0	0	1	0	0	0	0	0
Beverages, Fermented	0	0	0	0	0	0	0	0	0	0	0	0	0	0	0	0	0	0	0	0	0	0	0	0	0	0	0	0	0	0	0	0	0	0	0	0	0	0	0	0	0	0	0	1	0	0	0	0	0
Beverages, Alcoholic	0	0	0	0	0	0	0	0	0	0	0	0	0	0	0	0	0	0	0	0	0	0	0	0	0	0	0	0	0	0	0	0	0	0	0	0	0	0	0	0	0	0	0	1	0	0	0	0	0
Fish, Liver Oil	0	0	0	0	0	0	0	0	0	0	0	0	0	0	0	0	0	0	0	0	0	0	0	0	0	0	0	0	0	0	0	0	0	0	0	0	0	0	0	0	0	0	0	0	1	0	0	0	0
[truncated: 114 more columns]

## Sheet: Table S6 Economy category
Economy number	Economy	Code	Region	Income group
1	Austria	AUT	Europe & Central Asia	High income
2	Belgium	BEL	Europe & Central Asia	High income
3	Bulgaria	BGR	Europe & Central Asia	High income
4	Cyprus	CYP	Europe & Central Asia	High income
5	Czech Republic	CZE	Europe & Central Asia	High income
6	Germany	DEU	Europe & Central Asia	High income
7	Denmark	DNK	Europe & Central Asia	High income
8	Estonia	EST	Europe & Central Asia	High income
9	Spain	ESP	Europe & Central Asia	High income
10	Finland	FIN	Europe & Central Asia	High income
11	France	FRA	Europe & Central Asia	High income
12	Greece	GRC	Europe & Central Asia	High income
13	Croatia	HRV	Europe & Central Asia	High income
14	Hungary	HUN	Europe & Central Asia	High income
15	Ireland	IRL	Europe & Central Asia	High income
16	Italy	ITA	Europe & Central Asia	High income
17	Lithuania	LTU	Europe & Central Asia	High income
18	Luxembourg	LUX	Europe & Central Asia	High income
19	Latvia	LVA	Europe & Central Asia	High income
20	Malta	MLT	Middle East & North Africa	High income
21	Netherlands	NLD	Europe & Central Asia	High income
22	Poland	POL	Europe & Central Asia	High income
23	Portugal	PRT	Europe & Central Asia	High income
24	Romania	ROU	Europe & Central Asia	High income
25	Sweden	SWE	Europe & Central Asia	High income
26	Slovenia	SVN	Europe & Central Asia	High income
27	Slovak Republic	SVK	Europe & Central Asia	High income
28	United Kingdom	GBR	Europe & Central Asia	High income
29	United States	USA	North America	High income
30	Japan	JPN	East Asia & Pacific	High income
31	China	CHN	East Asia & Pacific	Upper middle income
32	Canada	CAN	North America	High income
33	Korea, Rep.	KOR	East Asia & Pacific	High income
34	Brazil	BRA	Latin America & Caribbean	Upper middle income
35	India	IND	South Asia	Lower middle income
36	Mexico	MEX	Latin America & Caribbean	Upper middle income
37	Russian Federation	RUS	Europe & Central Asia	High income
38	Australia	AUS	East Asia & Pacific	High income
39	Switzerland	CHE	Europe & Central Asia	High income
40	Turkey	TUR	Europe & Central Asia	Upper middle income
41	Taiwan, China	TWN	East Asia & Pacific	High income
42	Norway	NOR	Europe & Central Asia	High income
43	Indonesia	IDN	East Asia & Pacific	Upper middle income
44	South Africa	ZAF	Sub-Saharan Africa	Upper middle income
45	RoW Asia and Pacific			Lower middle income
46	RoW America			Lower middle income
47	RoW Europe			Upper middle income
48	RoW Africa			Low income
49	RoW Middle East			Upper middle income
